# Mutual repression between JNK/AP-1 and JAK/STAT stratifies cell behaviors during tissue regeneration

Janhvi Jaiswal <sup>1,2</sup>, Raphael Engesser <sup>3</sup>, Andrea Armengol Peyroton <sup>1</sup>, Vanessa Weichselberger <sup>1,2</sup>, Carlo Crucianelli <sup>1</sup>, Isabelle Grass <sup>1,4</sup>, Jens Timmer <sup>3,4,5</sup> and Anne-Kathrin Classen\* <sup>1,4,5</sup>

\* corresponding author

*1 Hilde-Mangold-Haus, University of Freiburg, Germany*

*2 Spemann Graduate School of Biology and Medicine (SGBM), University of Freiburg, Germany*

*3 Institute of Physics and Freiburg Centre for Data Analysis and Modeling, University of Freiburg, Germany*

*4 CIBSS Centre for Integrative Biological Signalling Studies, University of Freiburg, Germany*

*5 BIOSS Centre for Biological Signalling Studies, University of Freiburg, Germany*

## Abstract

Epithelial repair relies on the activation of stress signaling pathways to coordinate cellular repair behaviors. Their deregulation is implicated in chronic wound and cancer pathologies. Despite such translational importance, an understanding of how spatial patterns of signaling pathways and repair behaviors arise in damaged tissues remains elusive. Using TNF- $\alpha$ /Eiger-mediated inflammatory damage to *Drosophila* imaginal discs, we uncover that JNK/AP-1 signaling cells act as paracrine organizers and initiate a mutual repression network that spatially segregates JNK/AP-1 and JAK/STAT signaling cells into distinct populations. While JNK/AP-1 signaling cells produce JAK/STAT-activating Upd ligands, these signal-sending cells suppress activation of JAK/STAT via Ptp61F. Conversely, responding cells with activated JAK/STAT suppress JNK activation via Zfh2. The resulting bistable segregation of signaling domains is associated with distinct cellular tasks and regenerative potential. While JNK/AP-1 signaling cells at the wound center act as paracrine organizers, their cell cycle is senescently arrested. Thus, compensatory proliferation occurs exclusively in JAK/STAT signaling cells at the wound periphery. This spatial stratification is essential for proper tissue repair, as co-activation of JNK/AP-1 and JAK/STAT in the same cells creates conflicting inputs on cell cycle progression, leading to excess apoptosis of senescently arrested organizer cells. Finally, we demonstrate that bistable spatial segregation of JNK/AP-1 and JAK/STAT drives senescent and proliferative behaviors in transient as well as chronic tissue damage models, and importantly, in *Ras*<sup>V12</sup>, *scrib* tumors under the influence of JNK/AP-1 activity. Revealing this previously uncharacterized regulatory network between JNK/AP-1, JAK/STAT and associated cell behaviors have important implications for our conceptual understanding of tissue repair, chronic wound pathologies and tumor microenvironments, where both pathways are strongly implicated.

## Introduction

Wound repair programs rely on the coordination of distinct responses to damage [1, 2]. Upon damage, wound-derived factors initiate inflammation and stress-signaling pathways which drive cellular responses like apoptosis, proliferation, survival and tissue remodeling [3-6]. While these responses are essential, it is critical that they remain spatio-temporally restricted to avoid the establishment of chronic wounds [7-9]. Chronic wounds are characterized by sustained inflammation, and deregulated proliferation and apoptosis [10]. The finding that these are also hallmarks of tumor microenvironments supported the idea that tumors resemble chronic, non-healing wounds [11-13]. Yet, the tissue-level coordination of signaling pathways and repair behaviors upon wounding, and the conditions under which they turn pathological remain elusive.

A myriad of wound models identified specific signaling pathways required for regeneration, of which several have also been shown to drive tumor growth. In particular, the JNK/AP-1 and the JAK/STAT pathways are consistently implicated in regeneration [14-17] as well as in tumors [18-23]. In the context of wound-healing, JNK/AP-1 activation is indispensable for regeneration [24-26]. JNK/AP-1 is one of the earliest signaling responses to damage, proposedly activated by wound-derived ROS signals [27, 28]. In this role, JNK/AP-1 regulates a variety of conflicting cell behaviors including apoptosis [29, 30], survival [31] and compensatory proliferation [32, 33]. These paradoxical behaviors have been extensively characterized individually [34-36], yet how they are organized on a tissue scale to ensure regeneration is not known.

We recently reported that high JNK/AP-1 signaling facilitates survival in wounds and tumors by mediating a cell cycle stall in G2 which is characterized by anti-apoptotic and senescent features [31]. Forced exit of these cells from G2 into mitosis and G1 caused a substantial increase in apoptosis, suggestive of the JNK-mediated G2 stall being a protective state during regeneration (Fig. S1A) [31]. This model is supported by recent evidence that the universal integrator of molecular damage, p53, is activated by the G2/M kinase Cdk1 to induce apoptosis competence upon exit from G2 [37]. The G2 protective state is critical as high JNK/AP-1 signaling cells are shown to produce mitogens necessary to induce compensatory proliferation and regeneration [28, 38-40]. Paradoxically, this reveals a cell population at the center of wounds which produces pro-proliferative signals but itself is prohibited from proliferation. These findings highlight the necessity of a mechanism, which ensures that high JNK/AP-1 signaling cells maintain a G2 stall in the presence of mitogenic signals, thereby outsourcing proliferation to other cells. Alternatively, it requires the existence of a mechanism that promotes cycling as well as survival of JNK-signaling cells. This illustrates that the underlying

mechanisms and molecular effectors that resolve these conflicting cell behaviors downstream of JNK/AP-1 signaling in the same tissues remains elusive.

Prominent cytokines produced by JNK/AP-1 signaling cells belong to the Unpaired (Upd) family [41-45] and activate the JAK/STAT pathway which, in turn, plays a significant role in mediating proliferation [18, 20, 28, 39, 46-50] and cell survival during tissue stress [51, 52]. Interestingly, we have previously also shown that JAK/STAT is required in the disc to restrict the expansion of JNK/AP-1 signaling [51]. This is essential as JNK/AP-1 signaling within the tissue can self-propagate by promoting an increase in the expression of its own paracrine activators - the TNF- $\alpha$ /Eiger (Egr) cytokine [53, 54], as well as ROS [28, 55, 56].

These observations indicate an interdependence between the JNK/AP-1 and JAK/STAT signaling pathways, whose coexistence has been consistently reported in wounds [14-17] and tumor tissues [18-23]. Yet the regulatory network of the two pathways, beyond the regulation of *upd*'s by JNK, remains so far unexplored. As JNK/AP-1 and JAK/STAT drive contradicting yet critical cell behaviors - namely G2 stalling and proliferation, linked by their regulation of survival - characterizing their regulatory interactions is essential to understand how these pathways cooperatively organize tissue stress responses.

## Results

### Figure 1 JNK/AP-1 and JAK/STAT segregate into distinct spatial domains upon tissue damage

To characterize the JNK/AP-1 and JAK/STAT signaling pathways at wound sites in detail, we analyzed signaling dynamics and repair behaviors induced by targeted expression of the TNF- $\alpha$  homologue *eiger* (*egr*) in the wing disc pouch (Fig. S1.1B,C). Ectopic *egr*-expression has been extensively used as a model to genetically induce wounds and study regeneration [57]. *egr*-expression activates the stress-signaling pathway JNK/AP-1, assessed by the sensitive JNK/AP-1 reporter - *TRE>RFP* (Fig. 1A,B) [58], which leads to loss of polarity, epithelial barrier dysfunction (Fig. S1.1D-E') and inflammation [24, 25, 59]. Specifically, expression of *egr* also induces *upd1-3* cytokine expression [51], MMP-1 production [60-62], ROS production [8, 63] and protective responses including UPR [64] and, ultimately, NF- $\kappa$ B signaling upregulation [65] (Fig.S1.1F-O, see also Fig.1E,F) in high JNK/AP-1 signaling cells – which are all known hallmarks of inflammatory, and by extension, chronic wounds [6, 10]. In addition, high JNK/AP-1 activity at the center of the *egr*-expressing domain (Fig. 1A,B) induces a senescent-like G2 cell cycle stall (Fig. 1C,D) which is essential for cell survival (Fig. S1.1A), as assessed using the Fly-FUCCI toolkit [31, 66]. Indeed, we found that proliferation was excluded from the

inflammatory JNK-signaling domain at the center of the disc and was restricted to the wound periphery (Fig. 1C,D,N). These observations highlight a pronounced spatial segregation of regenerative cell behaviors linked to JNK-induced tissue damage responses.

Upon tissue damage, *upd*'s - the pro-mitogenic cytokines for the JAK/STAT pathway - are generally upregulated at wound sites where JNK/AP-1 activity is high (Fig. 1E,F,M, see also S1.1F,G) [20, 28, 49, 51]. Consistent with their paracrine function [67, 68], JAK/STAT signaling was broadly induced in the pouch periphery and hinge of *egr*-expressing discs (Fig. 1G,H), coinciding with regions of proliferation (Fig. 1K,L,N). Yet, high JNK-signaling cells in *egr*-expressing discs that upregulated the transcriptional reporters for *upd1* and *upd3* (Fig. S1.1F,G; Fig. 1E,F,M) [69] did not undergo proliferation and, importantly, did not exhibit JAK/STAT activity, as assessed by the *10xStat92E>dGFP reporter* (Fig. 1I,J) [70]. This was in stark contrast to wing disc development where ligand expression and pathway activation patterns largely coincide [70-73]. Our unexpected finding that JAK/STAT signaling is low in *upd*-producing cells, strongly suggests that a distinct regulatory network controls JAK/STAT activation during JNK-driven responses to tissue damage.

To further support this conclusion, we first wanted to rule out that the observed JAK/STAT activation pattern in the periphery of *egr*-expressing discs perpetuated from early hinge patterns of developing discs due to a *Dilp8*-induced developmental delay (Fig. S1.2 A) [74]. Hence, we monitored temporal changes in JAK/STAT activity via a time course of 0h, 7h and 14h of *egr*-expression. We consistently observed ectopic induction of the JAK/STAT reporter in the hinge, above developmental levels and with an altered pattern (Fig. S1.2 B-M). This data confirmed that *upd1-3*-driven JAK/STAT activity is induced *de novo* in the hinge and pouch periphery upon tissue damage.

In summary, we find that JNK/AP-1 activation in the *egr*-expressing pouch coincides with the expression of *upd* cytokines. We show that *upd* cytokines activate JAK/STAT only non-autonomously in a cell population spatially segregated from high JNK-signaling and *upd*-producing cells. In addition to the well-described non-autonomous activation of JAK/STAT by JNK/AP-1 activation, this strongly indicates that cell-autonomous repression of JAK/STAT signaling may be an important consequence of JNK/AP-1 activation (Fig. 1O). This is consistent with recent observations of JNK/AP-1 and JAK/STAT activity segregation during tissue stress in other tissue types, such as epidermal wounds [14]. We therefore demonstrate a recurring theme of spatial segregation of JNK/AP-1 and JAK/STAT signaling upon tissue damage. Importantly, we also show that such spatial patterns of segregating JNK/AP-1 and

JAK/STAT signals strongly correlate with spatial segregation of regenerative cell behaviors, specifically G2 stalling and proliferation, into spatially distinct signaling domains.

## Figure 2 JNK/AP-1 signaling represses JAK/STAT activity

We wanted to first understand whether JNK/AP-1 directly represses JAK/STAT activity and thereby restricts it to the wound periphery. We therefore tested if clonal expression of JNK/AP-1 directly represses JAK/STAT activity, by co-expressing a constitutively activated form of the JNKK Hep along with p35 to prevent cell death [75, 76]. Indeed, *hep<sup>act</sup>* clones cell-autonomously repressed JAK/STAT activity (Fig. 2A-D, S2A), both when non-autonomously activating it in surrounding cells in the peripheral pouch, hinge or peripodium (Fig. 2A-C, S2A), as well as when within developmentally patterned activity in the hinge (Fig. 2D) [72]. These experiments demonstrate that JNK/AP-1 represses JAK/STAT signaling cell-autonomously, even when JNK/AP-1 has the ability to activate JAK/STAT non-autonomously.

In these mosaic experiments, hinge cells activated JAK/STAT signaling more robustly than cells of the central pouch (Fig. 2A-B), likely as a result of developmental pre-patterns conferring distinct competence [72]. Namely, the transcription factors Nubbin (Nub) and Rotund (Rn) reduce developmental Stat92E activity in the pouch [77]. To first exclude the possibility that JNK/AP-1 represses JAK/STAT by inducing pouch-specific transcription factors [77], we assessed Nub and Rn levels within *hep<sup>act</sup>* clones. *hep<sup>act</sup>* clones did not ectopically induce Nub or Rn, in fact, Nub was distinctly downregulated (Fig. S2B-D). Furthermore, we expressed *egr* in the posterior compartment of the wing disc and examined whether JAK/STAT could be activated in the adjacent anterior pouch (Fig. S1.1B). The cells highly positive for the JNK/AP-1 target gene - MMP-1 [78] did not activate JAK/STAT signaling. However, JAK/STAT signaling could be distinctly activated in the surrounding tissue, including the anterior pouch (Fig. 2E,F). These experiments confirm that JAK/STAT signaling can *in principle* be activated *de novo* in the pouch by cell non-autonomous activity of JNK/AP-1 signaling cells. Altogether, these experiments demonstrate that tissue damage associated with high levels of JNK/AP-1 signaling repress JAK/STAT activity in a cell autonomous manner, independent of developmental competence.

Accordingly, we wanted to better understand if JAK/STAT repression by JNK/AP-1 may depend on JNK/AP-1 signaling strength or time. We therefore analyzed the temporal evolution of JNK/AP-1 and JAK/STAT activity in the JNK-signaling domain of *egr*-expressing discs. A time course analysis revealed that JAK/STAT was mildly elevated during short-term JNK-



signaling in the pouch by 7 h of *egr*-expression, and increased even further with 14 h of *egr*-expression (Fig. 2K,L,N,O, Fig. S2E,F,H,I,K,). Interestingly, cells displayed co-existence of both pathways at moderate levels, but also often displayed exclusive activation of either reporter (Fig. S2L,M). After 24 h of sustained *egr*-expression, high JNK/AP-1 signaling was observed in the pouch, but notably, JAK/STAT activity had now largely disappeared from this domain (Fig. 2M,P, Fig. S2G,J,K). These observations reveal that short-term or moderate activity of JNK/AP-1 facilitates local, intermixed activation of JAK/STAT. However, sustained and high activation of JNK/AP-1 efficiently excludes JAK/STAT activity cell autonomously. As a consequence, JNK/AP-1 and JAK/STAT signaling are increasingly segregated into distinct cell populations within the tissue.

Notably, these signaling dynamics are synchronously followed by cell behavior dynamics. We observed that prolonged JNK/AP-1 signaling correlated with an increased exclusion of proliferation from the pouch (Fig. 2G-J; Fig. 1K,L,N). Altogether, these data suggest that chronic and high levels of JNK/AP-1 activation drive spatial wound site signaling and cell behavior patterns from a local intermixed state to a larger, segregated and bistable field.

### **Figure 3** **JNK/AP-1 acts as a wound organizer by employing a mutual-repression network**

We wanted to understand the type of regulatory interactions between JNK/AP-1 and JAK/STAT pathways that establish spatially segregated signaling domains on a tissue scale [79-82]. Regulatory networks describe how components of different signaling pathways interact [83-85] or are integrated to define a cell's signaling state and establish distinct cellular outcomes [86, 87]. How regulatory networks can also organize cellular behaviors to influence tissue-level outcomes has been extensively described using mathematical modeling [88-90].

To characterize the rules of the regulatory network between JNK/AP-1 and JAK/STAT that ultimately drives emergence of spatial segregation to organize tissue stress responses, we developed a mathematical model using partial differential equations. These described the spatio-temporal evolution of JNK/AP-1 and JAK/STAT activation depending on relative concentrations of components in the system (Fig. 3A-C) [86, 91]. We defined a set of experimentally determined rules, namely: (1) JNK/AP-1 effectors propagate JNK/AP-1 via production of paracrine factors, such as *egr* or diffusible ROS [28, 54, 92]; (2) JNK/AP-1 effectors activate JAK/STAT via production of paracrine factors, such as *upd*'s [20, 28, 49, 51]; (3) Both pathways use positive feedback loops to enhance and stabilize their own activation [42, 55, 56, 93] and (4) JAK/STAT represses JNK/AP-1 cell-autonomously, via the ZEB-1

homologue Zfh2 (Fig. S3A-C) [51]. To simplify the model (Fig. 3B), we excluded negative feedback loops on JNK/AP-1 and JAK/STAT [94-96], as they often have a more modulatory function in noise buffering, temporal processing or saturation dynamics [97].

As we found experimentally that JNK/AP-1 repressed JAK/STAT cell-autonomously, we also designed a mutual repression model that, together with the aforementioned rules, included a rule that JNK/AP-1 represses JAK/STAT signaling (Fig. 3A,B') [98]. Using an unbiased sampling approach of a large parameter space, we compared the ability of the two models to produce simple bistable patterns (Fig. 3D). We found that the mutual repression model produced 140-fold more positive outcomes than a uni-directional model (10588 vs. 72 solutions) (Fig. 3E). When we switched from scoring simple bistable patterns (Fig. 3D) to observed bistable patterns (Fig. 3D') of JNK/AP-1 and JAK/STAT signaling in *egr*-expressing wing discs, the difference in competencies between the two models became even more prominent (Fig. 3E'). The uni-directional model was not sufficient to recapitulate observed bistable patterns, which suggests that the rule of JNK/AP-1 cell-autonomously repressing JAK/STAT is necessary for generating the segregated JNK/AP-1 and JAK/STAT signaling patterns seen during tissue stress. Accordingly, we show that a mutual-repression network lies at the core of JNK/AP-1 and JAK/STAT signaling interactions in response to tissue damage. Supporting this result, mutual repression networks have been extensively described to guide the formation of bistable states [99-105]. Furthermore, these networks can be further enhanced by self-activation loops, such as those integrated in our model [98, 102, 106]. Indeed, if JNK/AP-1 and JAK/STAT cross-talk were to completely lack mutual repression, JNK/AP-1 and JAK/STAT signaling would be expected to expand from the wound site in an unrestrained manner. Thus, the mutual repression regulatory network also ensures that these signaling pathways remain restricted during regeneration.

The length scale-independent space utilized by the model raises the possibility that this mutual repression network could act at length scales ranging from neighboring cells to multicellular tissues. *In vivo*, length scales may depend on the level of network activation and thus the concentration of non-autonomously acting cytokines (Egr, Upd's), as suggested by experiments shown in (Fig. 2K-P and Fig. S1.2). Indeed, we observed that the number of segregating solutions produced by the model increased with increasing rates of JNK/AP-1 activity (Fig. S3D). This observation parallels the progressive segregation of signaling domains found experimentally upon chronic activation of JNK/AP-1 signaling (Fig. 2K-P).

Taken together we propose that JNK/AP-1 initiates a mutual repression network between JNK/AP-1 and JAK/STAT signaling that, via the production of Upd's, facilitates the spatial



segregation of these two pathways. The spatial segregation of JNK/AP-1 and JAK/STAT via mutual repression allows the tissue to maintain a JNK-dependent G2 stall in the presence of pro-mitogenic signals, and restricts proliferation to a separate cell population. Thus, induction of JNK/AP-1 signaling upon tissue damage and mutual repression with JAK/STAT is sufficient to set up temporal and spatial signaling patterns, and functionally distinct cell populations.

#### **Figure 4** **Ptp61F represses JAK/STAT activity in JNK/AP-1 signaling cells**

To understand how JNK/AP-1 may cell-autonomously repress JAK/STAT activation, we first asked if JNK/AP-1 downregulates core components of the JAK/STAT pathway. Our previous study demonstrated that the core components *dome*, *hop* and *stat92E* [107] were not transcriptionally altered in *egr*-expressing discs [51]. Supporting this observation, we found that the expression of GFP-tagged Hop [108] and Stat92E proteins from functionally validated lines were unaltered in *egr*-expressing cells (Fig. S4.1A-I). This suggested that repression of JAK/STAT signaling was likely due to altered function of regulators of JAK/STAT signaling. We thus analyzed known negative regulators in *egr*-expressing discs. Levels of dPIAS/Su(var)2-10 [109] and Apontic [110] were unchanged, but *ken* expression [111] was elevated in *egr*-expressing discs (Fig. S4.2A-F). However, neither knock-down of *ken* nor *dPIAS/Su(var)2-10* increased JAK/STAT activity in *egr*-expressing cells (Fig. S4.2G-L). Similarly, we could not reproduce findings that knockdown of *apontic* reinstated JAK/STAT signaling in *egr*-expressing discs (Fig. S4.2M-O) [112].

We then turned to the tyrosine phosphatase *Ptp61F*, a known repressor of Stat92E activation [113, 114] which is transcriptionally induced in JNK-dependent tumors and other stress conditions [23, 115]. Repression of JAK/STAT signaling by Ptp61F may occur at the level of receptor complex signaling or Stat92E activity [113, 114, 116]. We found that knock-down of *ptp61F* caused upregulation of the Stat92E reporter activity in high JNK-signaling cells of *egr*-expressing discs (Fig. 4A-E, Fig. S4.3A-C). This suggests that Ptp61F is specifically required in JNK-signaling cells to suppress Stat92E activity. Hence, to test if dephosphorylation of Stat92E in JNK-signaling cells is rate-limiting for JAK/STAT signaling, we overexpressed an HA-tagged Stat92E [117] in *egr*-expressing cells to saturate the dephosphorylation capacity of Ptp61F. Indeed, *egr,stat92E-HA*-coexpressing cells in the central pouch domain activated the JAK/STAT reporter at higher levels when compared to *egr*-expressing discs (Fig. 4F-J, Fig. S4.3D,E). In contrast, co-expression of the JAK *hop* failed to induce JAK/STAT reporter activity in *egr*-expressing discs (Fig. S4.3F-I). Importantly, this demonstrates that while signal transduction from Upd ligands down to the effector Stat92E is in principle active in JNK-

signaling cells, it is the Ptp61F-mediated dephosphorylation of Stat92E that becomes rate-limiting for JAK/STAT signaling.

## **Figure 5** **JAK/STAT repression is required for the G2 stall and protects central wound cells from apoptosis**

As spatial segregation of JNK/AP-1 and JAK/STAT signaling domains was a robust feature of *egr*-expressing discs, we wondered if the mutual repression network was necessary for regeneration. We therefore forced expression of Stat92E in high JNK/AP-1 signaling cells, and closely monitored cell and tissue level responses, such as cell survival and proliferation. The loss of JNK/AP-1 and JAK/STAT segregation led to a pronounced increase in apoptosis (Fig. 5A-D). Co-expression of UAS-GFP confirmed that these apoptotic cells originated from cells where JNK/AP-1 and JAK/STAT were forcibly co-activated (Fig. S5A-D).

We thus hypothesized that JAK/STAT interfered with the protective G2-stall of high JNK-signaling cells, and thereby increased apoptosis [31, 37]. While Stat92E expression altered the proportion of S-phase cells in undamaged control discs, we observed no changes in the proportion of cells in G1 or G2 (Fig. S5E-H). In contrast, a cell cycle analysis of *egr, Stat92E-HA* co-expressing domains revealed a substantial increase in G1 and S-phase cells, indicating that JNK-signaling cells failed to stall in G2 (Fig. 5E-J). Thus, forced Stat92E activation in high JNK-signaling cells overrides the protective JNK-induced G2 stall and consequently increases apoptosis. Supporting these results, we found that knock-down of Ptp61F in *egr*-expressing discs also led to an increase in cycling cells in the tissue (Fig. 5O,P) correlating with increased levels of apoptosis (Fig. 5K-N). This highlights the necessity of JNK/AP-1 and JAK/STAT signaling segregation within the tissue, as it maintains the G2 stalled cell population. Thus, the JNK-induced mutual repression network ensures the establishment of two distinct and indispensable cell populations - one that stalls in G2 to prevent apoptosis and secrete necessary pro-mitogenic factors like Upd and other paracrine effectors like Dilp8 and ImpL2 [20, 74], and a second that is able to respond to mitogenic signals and undergoes proliferation necessary for regeneration. The strong similarities with paracrine signaling centers regulating spatial patterning networks linked to specific cell behaviors and fate during development encourages us to propose that the JNK-induced mutual repression network with JAK/STAT functions as a central wound organizer network [118, 119].

## Figure 6

### The wound organizer network segregates JNK/AP-1 and JAK/STAT signaling to drive oncogenic growth

Our observation that tissue repair processes after chronic damage support the establishment of a signaling-sending and a responding cell population, which are respectively G2-stalled or proliferative, led us to speculate that such a wound organizer network could well-support a tumor microenvironment. Interestingly, the coexistence of JNK/AP-1 and JAK/STAT pathways in tumors has been extensively described [18-23] and the existence of signal-sending G2-stalled cells controlling non-autonomous proliferation has been demonstrated [31]. However, their spatial patterns have not been well defined.

To understand if JNK/AP-1 and JAK/STAT also engage in a mutual repression network under tumor conditions, we analyzed discs with a reduction in the well-characterized *scrib* tumor-suppressor gene [120] or ectopic expression of oncogenic *Ras<sup>V12</sup>* [121, 122]. To generate a large genetically homogenous tissue, we used the pouch specific *rn-GAL4* driver to express *Ras<sup>V12</sup>* or *scrib-RNAi* in the entire wing pouch. A wing pouch expressing oncogenic *Ras<sup>V12</sup>* for 44 h did not activate JNK/AP-1 or JAK/STAT reporters, demonstrating that *Ras<sup>V12</sup>* alone does not co-opt either pathway (Fig. 6A,B, Fig. S6A,B). RNAi-driven knock-down of *scrib* induced barrier dysfunction (Fig. S6C,D) and, consistent with previous reports [123, 124], moderately activated both JNK/AP-1 and JAK/STAT in the pouch (Fig. S6E-H). A closer examination, however, revealed that the *scrib-RNAi* expressing pouch predominantly segregated JNK/AP-1 and JAK/STAT signaling at the level of small cell clusters, while only few cell clusters displayed co-activation of both pathways (Fig. 6C). This pattern mirrored our observations of short-term *egr*-expression (Fig. S2L,M), thus suggesting that different contexts of mild JNK-activation cause segregation at short distances. These observations indicate that JNK/AP-1 activation upon barrier dysfunction via disruption of cell polarity also induces the wound organizer network, which subsequently sets up a bistable segregation of both pathways even at a short range between neighboring cells.

Curiously, if *Ras<sup>V12</sup>* and *scrib* mutations occur in the same cell, they cooperate to cause dramatic overproliferation of imaginal discs, which is not observed in single *Ras<sup>V12</sup>* or *scrib* mutant tissues. This cooperativity is thought to be driven by activation of JNK/AP-1, as a consequence of *scrib* disrupting cell polarity. JNK/AP-1 signaling then induces *upd*'s and JAK/STAT activation, which can be utilized by a *Ras<sup>V12</sup>* controlled network to drive overgrowth [18, 122]. We thus wondered if *Ras<sup>V12</sup>* may disable the mutual repression motif between JNK/AP-1 and JAK/STAT. This would allow autocrine activation of JAK/STAT by JNK signaling in the same cell, as generally described in the literature [18, 122]. Cells driven to cycle despite

activation of JNK/AP-1 may then be protected by anti-apoptotic functions of Ras<sup>V12</sup>. We wanted to test this hypothesis and closely monitored JNK/AP-1 and JAK/STAT signaling as well as cell proliferation in Ras<sup>V12</sup> and *scrib* RNAi-coexpressing discs. Surprisingly, we found that JNK/AP-1 and JAK/STAT activation were still clearly segregated into exclusive signaling domains (Fig. 6D-F, Fig. S6I) with proliferation still predominantly associated with JAK/STAT (Fig. 6G-I). This suggests that even in a Ras<sup>V12</sup> and *scrib* cooperativity model, where all cells are genetically identical, bistability driven by the mutual repression network organizes the pouch into distinct JNK/AP-1 or JAK/STAT-signaling domains. This observation aligns with previous observations that cooperativity between Ras and *scrib* can rely, in principle, on non-autonomous interactions [18, 125]. Crucially however, our observations demonstrate that non-autonomous cooperation between JNK/AP-1-activating and Ras<sup>V12</sup> mutation arises as a self-organizing principle from a wound organizer network creating segregating signaling domains in a genetically homogenous tumorigenic tissue. Moreover, it suggests that activation of this wound organizer network and segregation of signaling and proliferative tasks may provide an advantage to tumors over autocrine integration of JNK/AP-1 and JAK/STAT signaling in the same cell.

## Discussion

Previous studies established a role for JNK/AP-1 in promoting regeneration upon injury [35, 59]. This role is, in part, mediated by the expression of *upd*'s which are essential to promote proliferation and survival via JAK/STAT signaling in a non-autonomous manner [28, 35, 48, 51, 126-129]. By identifying a mutual repression network between JNK/AP-1 and JAK/STAT, we conceptually establish JNK as a core organizer of tissue repair with parallels to organizers of cell fate patterning in developing tissues. The rules of the wound regulatory network we describe have important implications. Previous reports suggest that JNK/AP-1 activates itself non-autonomously, for example via activation of paracrine *egr* or ROS [28, 54, 92]. This implies that JNK/AP-1 activation could result in unchecked spatial expansion of JNK/AP-1-signaling, and accordingly of JAK/STAT signaling. Their unrestrained co-expansion would likely result in chronic inflammation. However, the mutual repression motif restrains the expansion of both JNK/AP-1 and JAK/STAT signaling domains, thus defining stable regions of inflammatory (mitogenic signals) and regenerative (pro-proliferative) responses at the start of the tissue repair process. We demonstrate that molecular mediators of mutual repression are Zfh2 downstream of JAK/STAT [51], and Ptp61F downstream of JNK.

At the level of cell behaviors, JNK/AP-1 and JAK/STAT generate mutually exclusive responses (Fig. 7B). JNK/AP-1 signaling supports wound center behaviors like tissue sealing [24, 25, 78],

cell fusion [14], establishment of paracrine signaling and importantly, an apoptosis-resistant state that depends on a G2 cell cycle stall [31]. In contrast, JAK/STAT signaling supports wound-distal behaviors, such as compensatory proliferation, potentially via upregulation of G1-S cyclins such as CycD or CycE [130, 131].

By reducing Stat92E activation upon damage, JNK/AP-1 creates a permissive state for the G2 stall by preventing cycling, thereby protecting cells from apoptosis in a cytotoxic, inflammatory environment (Fig. 7C; Fig. S1A). When high levels of both pathways are co-activated in the same cell, the anti-apoptotic state of the G2 stall is in conflict with proliferative outcomes and therefore active cycling which causes an increase in apoptosis. Consequently, apoptosis of these wound center signaling cells could jeopardize wound organizer function and ultimately tissue repair behaviors (Fig. 7D). Therefore, the JNK-activated G2-stall and JAK/STAT-activated cell cycling need to be spatially segregated. Importantly, our observations indicate that, with exceptions [132], even successful tumors avoid coexistence of JNK and JAK/STAT signaling in the same cell as they do not profit from the conflicting cell-autonomous inputs on proliferation and survival decisions. Instead, tumors may hijack a wound organizer network to chronically activate paracrine mitogenic signals but outsource proliferation to other cells as a consequence of the senescent properties of JNK-signaling, G2-stalled cells [31].

We find that spatial patterns generated by the JNK/AP-1 and JAK/STAT regulatory network act at different length scales, depending on the duration and strength of JNK/AP-1 activation (Fig. 7A). Transient or low JNK/AP-1 activity generates short range spatial segregation of JNK/AP-1 and JAK/STAT. Specifically, we observed their segregation between neighboring cells upon transient expression of *egr* or mild disruption of barrier function in *scrib*-RNAi expressing tissue. Cell-by-cell segregation may allow tissue repair processes to respond dynamically. Switching between (1) a stalled, apoptosis-resistant state supporting survival and paracrine signaling in an inflammatory environment or (2) a regenerative, proliferative phenotype could facilitate continuous integration of the repair state. As wound healing progresses and the JNK/AP-1 signaling field shrinks, shifting spatial probabilities of stalled and cycling cells would ultimately resolve the damage.

In contrast, prolonged or high JNK/AP-1 activity segregates JAK/STAT signaling more robustly and consequently into larger bistable fields, prolonging wound resolution and increasing the risk for chronic wound pathologies. Indeed, prolonged JNK/AP-1 activity in *Ras<sup>v12</sup>, scrib*-RNAi tumors or by chronic expression of *egr* drives robust bistable segregation of JNK/AP-1 and JAK/STAT signaling into larger domains. Similarly, chronic wounds in human patients display striking segregation of cellular responses. In a central inflammatory domain, cells acquire

452 senescent phenotypes, arrest and fail to proliferate. In the periphery, a hyperproliferative edge  
 453 is evidence of chronic mitogenic signals emanating from the wound [3, 9, 10, 133]. These  
 454 clinical patterns resemble patterning in *egr*-expressing discs, thereby suggesting that  
 455 *Drosophila* imaginal discs may represent a suitable model to study wound pathologies driven  
 456 by prolonged activation of inflammatory signaling.



# Materials and Methods

## Fly stocks

All fly stocks and experimental crosses were maintained on standard media and raised at 18 °C or room temperature (22 °C) unless otherwise specified. For detailed genotypes, please refer to Table S1 and S2.

Table S1 Key Resources Table

| Designation - Genetic reagent ( <i>D. melanogaster</i> )                                      | Source or Reference | Identifiers            | Additional information                                       |
|-----------------------------------------------------------------------------------------------|---------------------|------------------------|--------------------------------------------------------------|
| 'RFP': Act5C>FRT.CD2>GAL4, UAS-RFP                                                            | PMID: 29494583      | BDSC: 30558            |                                                              |
| 'apt-RNAi': UAS-apt RNAi (TRiP.JF02134)                                                       | PMID: 26320097      | BDSC: 26236            |                                                              |
| 'Dif-GFP': Pbac(Dif-GFP.FPTB)VK00033                                                          |                     | BDSC: 42673            |                                                              |
| dome <sup>G0441</sup>                                                                         | PMID: 11751581      | BDSC: 12030            |                                                              |
| 'dome-GFP': FlyFos (dome::TGVBF)                                                              | PMID: 26896675      | VDRC: 318098           |                                                              |
| 'E2F1-FUCCI, CycB-FUCCI'; Ubi-GFP.E2f1 <sup>1-230</sup> , Ubi-mRFP1.NLS.CycB <sup>1-266</sup> | PMID: 24726363      | BDSC: 55123            |                                                              |
| 'egr <sup>ts</sup> ': tub-GAL80ts, UAS-egr                                                    |                     |                        | I.Hariharan, University of California, Berkeley              |
| 'en>RFP': enGAL4, UAS-mRFP.NLS                                                                |                     | BDSC: 30557            |                                                              |
| GFP-HP-1                                                                                      | PMID: 18316477      | BDSC: 30561            |                                                              |
| gstD-GFP                                                                                      | PMID: 18194654      |                        | D. Bohmann, University of Rochester Medical Center           |
| 'hep <sup>act</sup> ': UAS-hep <sup>act</sup>                                                 | PMID: 10903185      | BDSC: 9306             |                                                              |
| 'hop': UAS-hop.H                                                                              | PMID: 7796812       | BDSC: 79033            |                                                              |
| hop <sup>34</sup>                                                                             | PMID: 3095163       |                        | N. Perrimon                                                  |
| 'hop-GFP': FlyFos (hop::TGVBF)                                                                | PMID: 26896675      | VDRC: 318158           |                                                              |
| hsflp <sup>122</sup>                                                                          |                     |                        | D. Bilder, University of California, Berkeley                |
| 'GFP': UAS-GFP S56T                                                                           |                     | BDSC: 1521             |                                                              |
| 'ken-LacZ': P{PZ}ken <sup>02970</sup>                                                         | PMID: 10471706      | BDSC: 11244            |                                                              |
| 'ken-RNAi': UAS-ken-RNAi (TRiP.HMS01219)                                                      | PMID: 26320097      |                        |                                                              |
| 'ptp61f-RNAi': UAS-ptp61f-RNAi <sup>i2-5</sup>                                                | PMID: 19398577      | BDSC: 56510            |                                                              |
| 'p35': UAS-p35.H                                                                              | PMID: 9144202       | BDSC: 5072             |                                                              |
| 'rn(ts)>': rn <sup>GAL4-Delta5</sup> , tubGAL80 <sup>ts</sup>                                 |                     | BDSC: 8142             | recombinant                                                  |
| 'rn(ts)>egr': rn <sup>GAL4-5</sup> , UAS-egr, tubP-GAL80 <sup>ts</sup>                        |                     | BDSC: 8142; BDSC: 7018 | recombinant; I.Hariharan, University of California, Berkeley |
| 'Ras <sup>v12</sup> , scrib-RNAi': UAS-Ras <sup>v12</sup> , scrib-RNAi                        |                     |                        | M. Uhlirova, University of Cologne                           |
| 'Ras <sup>v12</sup> ': UAS-Ras <sup>v12</sup>                                                 |                     |                        | H. Richardson, University of Melbourne                       |
| 'rne/F-EGFP': rn(E/F)-EGFP (ds Red+)                                                          | PMID: 26497147      |                        | P. Volkan, Duke University School of Medicine                |
| 'scrib-RNAi': UAS-scrib RNAi                                                                  |                     |                        | M. Uhlirova, University of Cologne                           |
| 'Stat92E': UAS-Stat92E.ORF.3xHA                                                               | PMID: 23583758      | Fly-ORF F000750        |                                                              |
| 'Stat92E <sup>R5c9</sup> ': FRT82B stat92E <sup>R5c9</sup>                                    |                     |                        | E. Bach, New York University School of Medicine              |
| 'Stat92E>dGFP': 10xStat92E>dGFP                                                               | PMID: 17008134      |                        |                                                              |

|                                                                    |                |             |                                                  |
|--------------------------------------------------------------------|----------------|-------------|--------------------------------------------------|
| 'Stat92E>GFP': 10xStat92E>GFP                                      | PMID: 17008134 |             |                                                  |
| 'Stat92E-GFP': PBac{Stat92E-GFP.FLAG} <sup>VK00037</sup>           |                | BDSC: 38670 |                                                  |
| 'su(var)2-10-GFP': PBac{Su(var)2-10-GFP.FPTB} <sup>VK00037</sup>   | PMID: 29284660 | BDSC: 64795 |                                                  |
| 'su(var)2-10-RNAi': UAS- Su(var)2-10-RNAi <sup>TRIP.HMS00750</sup> | PMID: 26320097 | BDSC: 32956 |                                                  |
| 'TRE>RFP': TRE-DsRed.T4                                            | PMID: 22509270 |             |                                                  |
| 'Xbp1-GFP': UAS-Xbp1-GFP.HG                                        | PMID: 23160805 | BDSC: 60731 |                                                  |
| upd3.1-3-LacZ                                                      |                |             | I.Hariharan, University of California, Berkeley  |
| upd-LacZ: upd>LacZ (PD1)                                           | PMID: 8582614  |             | Y. H. Sun, Academia Sinica, Taipei               |
| w <sup>118</sup>                                                   |                |             |                                                  |
| 'zfh2': UAS-zfh2[EAB]                                              | PMID: 24172131 |             | F. Diaz-Benjumea, Universidad Autónoma de Madrid |

| Antibodies / Commercial Kits                  | Source or Reference                                                | Identifiers     | Dilution |
|-----------------------------------------------|--------------------------------------------------------------------|-----------------|----------|
| Chicken anti-GFP                              | Abcam                                                              | Cat. #: ab13970 | (1:1000) |
| Mouse anti-H3-pS10                            | Abcam                                                              | Cat. #: ab14955 | (1:2000) |
| Mouse anti-β-Galactosidase                    | Promega                                                            | Cat. #: Z3782   | (1:1000) |
| Mouse monoclonal anti-MMP-1                   | DSHB                                                               | Cat. #: 3A6B4   | (1:30)   |
| Mouse monoclonal anti-MMP-1                   | DSHB                                                               | Cat. #: 3B8D12  | (1:30)   |
| Mouse monoclonal anti-MMP-1                   | DSHB                                                               | Cat. #: 5H7B11  | (1:30)   |
| Mouse monoclonal anti-Nubbin                  | DSHB                                                               | Cat. #: 2D4     | (1:100)  |
| Mouse monoclonal anti-α-Tubulin               | Sigma-Aldrich                                                      | Cat. #: T9026   | (1:5000) |
| Rabbit anti-cleaved Dcp-1                     | Cell Signaling                                                     | Cat. #: 9578    | (1:200)  |
| Rabbit monoclonal anti-GFP                    | Invitrogen                                                         | Cat. #: G10362  | (1:200)  |
| Rabbit polyclonal anti-apt                    | R. Schuh, MPI-MS, Göttingen                                        | NA              | (1:200)  |
| Rat monoclonal anti-GFP                       | Chromotek                                                          | Cat. #: 3H9-100 | (1:1000) |
| Rat monoclonal anti-HA                        | Monoclonal Antibody Core Facility at the Helmholtz Zentrum München | Clone #: 3F10   | (1:20)   |
| Rat monoclonal anti-RFP                       |                                                                    | Clone #: 5F8    | (1:20)   |
| Click-iT Plus EdU Alexa Fluor 647 Imaging Kit | Invitrogen                                                         | Cat. #: C10640  |          |

PMID – PubMed Identifier; BDSC – Bloomington Drosophila Stock Center; DSHB – Developmental Studies Hybridoma Bank, VDRC – Vienna Drosophila Stock Collection, FlyORF – University of Zurich ORFeome Project

465

## 466 Table S2. Detailed Genotypes

| Figure      | Panel   | Genotype                                                                                                         | Temperature shift | Recovery |
|-------------|---------|------------------------------------------------------------------------------------------------------------------|-------------------|----------|
| Figure 1    | A       | TRE-RFP; 10xStat92E>dGFP                                                                                         | 24h 30°C, D7 AED  | -        |
| Figure 1    | B       | TRE-RFP; 10xStat92E>dGFP/rn-GAL4, tub-GAL80 <sup>ts</sup> , UAS-egr                                              | 24h 30°C, D7 AED  | -        |
| Figure 1    | C       | Ubi-GFP.E2f1 <sup>1-230</sup> , Ubi-mRFP1.NLS.CycB <sup>1-266</sup> , rn-GAL4, tub-GAL80 <sup>ts</sup>           | 24h 30°C, D7 AED  | -        |
| Figure 1    | D       | Ubi-GFP.E2f1 <sup>1-230</sup> , Ubi-mRFP1.NLS.CycB <sup>1-266</sup> , rn-GAL4, tub-GAL80 <sup>ts</sup> , UAS-egr | 24h 30°C, D7 AED  | -        |
| Figure 1    | E       | TRE-RFP; Upd3.1-3-LacZ/rn-GAL4, tub-GAL80 <sup>ts</sup>                                                          | 24h 30°C, D7 AED  | -        |
| Figure 1    | F,M     | TRE-RFP; Upd3.1-3-LacZ/rn-GAL4, tub-GAL80 <sup>ts</sup> , UAS-egr                                                | 24h 30°C, D7 AED  | -        |
| Figure 1    | G,I,K   | TRE-RFP; 10xStat92E>dGFP/rn-GAL4, tub-GAL80 <sup>ts</sup>                                                        | 24h 30°C, D7 AED  | -        |
| Figure 1    | H,J,L,N | TRE-RFP; 10xStat92E>dGFP/rn-GAL4, tub-GAL80 <sup>ts</sup> , UAS-egr                                              | 24h 30°C, D7 AED  | -        |
| Figure S1.1 | D       | rn-GAL4, tub-GAL80 <sup>ts</sup>                                                                                 | 24h 30°C, D7 AED  | -        |

|             |         |                                                                                                             |                        |          |
|-------------|---------|-------------------------------------------------------------------------------------------------------------|------------------------|----------|
| Figure S1.1 | E       | <i>rn-GAL4, tub-GAL80<sup>ts</sup>, UAS-egr</i>                                                             | 24h 30°C, D7 AED       | -        |
| Figure S1.1 | F       | <i>Upd-LacZ/X; TRE-RFP; TM6B, tub-GAL80</i>                                                                 | 24h 30°C, D7 AED       | -        |
| Figure S1.1 | G       | <i>Upd-LacZ/X; TRE-RFP; rn-GAL4, tub-GAL80<sup>ts</sup>, UAS-egr</i>                                        | 24h 30°C, D7 AED       | -        |
| Figure S1.1 | H       | <i>SuVar2-10 GFP/rn-GAL4, tub-GAL80<sup>ts</sup></i>                                                        | 24h 30°C, D7 AED       | -        |
| Figure S1.1 | I       | <i>SuVar2-10 GFP/rn-GAL4, tub-GAL80<sup>ts</sup>, UAS-egr</i>                                               | 24h 30°C, D7 AED       | -        |
| Figure S1.1 | J       | <i>gstD-GFP; rn-GAL4, tub-GAL80<sup>ts</sup></i>                                                            | 24h 30°C, D7 AED       | -        |
| Figure S1.1 | K       | <i>gstD-GFP; rn-GAL4, tub-GAL80<sup>ts</sup>, UAS-egr</i>                                                   | 24h 30°C, D7 AED       | -        |
| Figure S1.1 | L       | <i>UAS-Xbp1-GFP.HG/ rn-GAL4, tub-GAL80<sup>ts</sup></i>                                                     | 24h 30°C, D7 AED       | -        |
| Figure S1.1 | M       | <i>UAS-Xbp1-GFP.HG/ rn-GAL4, tub-GAL80<sup>ts</sup>, UAS-egr</i>                                            | 24h 30°C, D7 AED       | -        |
| Figure S1.1 | N       | <i>TRE-RFP; Dif-GFP/rn-GAL4, tub-GAL80<sup>ts</sup></i>                                                     | 24h 30°C, D7 AED       | -        |
| Figure S1.1 | O       | <i>TRE-RFP; Dif-GFP/rn-GAL4, tub-GAL80<sup>ts</sup>, UAS-egr</i>                                            | 24h 30°C, D7 AED       | -        |
| <hr/>       |         |                                                                                                             |                        |          |
| Figure S1.2 | B,E     | <i>TRE-RFP; 10xStat92E&gt;dGFP/rn-GAL4, tub-GAL80<sup>ts</sup></i>                                          | 0h 30°C, D7 AED        | -        |
| Figure S1.2 | C,F     | <i>TRE-RFP; 10xStat92E&gt;dGFP/rn-GAL4, tub-GAL80<sup>ts</sup></i>                                          | 7h 30°C, D7 AED        | -        |
| Figure S1.2 | D,G     | <i>TRE-RFP; 10xStat92E&gt;dGFP/TM6B, tub-GAL80<sup>ts</sup></i>                                             | 14h 30°C, D7 AED       | -        |
| Figure S1.2 | H,K     | <i>TRE-RFP; 10xStat92E&gt;dGFP/rn-GAL4, tub-GAL80<sup>ts</sup>, UAS-egr</i>                                 | 0h 30°C, D7 AED        | -        |
| Figure S1.2 | I,L     | <i>TRE-RFP; 10xStat92E&gt;dGFP/rn-GAL4, tub-GAL80<sup>ts</sup>, UAS-egr</i>                                 | 7h 30°C, D7 AED        | -        |
| Figure S1.2 | J,M     | <i>TRE-RFP; 10xStat92E&gt;dGFP/rn-GAL4, tub-GAL80<sup>ts</sup>, UAS-egr</i>                                 | 14h 30°C, D7 AED       | -        |
| <hr/>       |         |                                                                                                             |                        |          |
| Figure 2    | A       | <i>hsflp<sup>122</sup>; UAS-p35; 10xStat92E&gt;dGFP/Act5C.GAL4 (FRT.CD2), UAS-RFP</i>                       | 10' HS 37°C, D7 AED    | 28h 22°C |
| Figure 2    | B,C     | <i>hsflp<sup>122</sup>; UAS-p35/UAS-hep<sup>act</sup>; 10xStat92E&gt;dGFP/Act5C.GAL4 (FRT.CD2), UAS-RFP</i> | 10' HS 37°C, D7 AED    | 28h 22°C |
| Figure 2    | D       | <i>hsflp<sup>122</sup>; UAS-p35/UAS-hep<sup>act</sup>; 10xStat92E&gt;dGFP/Act5C.GAL4 (FRT.CD2), UAS-RFP</i> | 7' HS 37°C, D5 AED     | 48h 22°C |
| Figure 2    | E       | <i>TRE-RFP; 10xStat92E&gt;dGFP</i>                                                                          | 24h 30°C, D7 AED       | -        |
| Figure 2    | F       | <i>enGAL4-mRFP.NLS/TRE-RFP; 10xStat92E&gt;dGFP/tub-GAL80<sup>ts</sup>, UAS-egr</i>                          | 24h 30°C, D7 AED       | -        |
| Figure 2    | G       | <i>TRE-RFP; 10xStat92E&gt;dGFP/rn-GAL4, tub-GAL80<sup>ts</sup></i>                                          | 7h 30°C, D7 AED        | -        |
| Figure 2    | H,K,N   | <i>TRE-RFP; 10xStat92E&gt;dGFP/rn-GAL4, tub-GAL80<sup>ts</sup>, UAS-egr</i>                                 | 7h 30°C, D7 AED        | -        |
| Figure 2    | I       | <i>TRE-RFP; 10xStat92E&gt;dGFP/rn-GAL4, tub-GAL80<sup>ts</sup></i>                                          | 14h 30°C, D7 AED       | -        |
| Figure 2    | J,L,O   | <i>TRE-RFP; 10xStat92E&gt;dGFP/rn-GAL4, tub-GAL80<sup>ts</sup>, UAS-egr</i>                                 | 14h 30°C, D7 AED       | -        |
| Figure 2    | M,P     | <i>TRE-RFP; 10xStat92E&gt;dGFP/rn-GAL4, tub-GAL80<sup>ts</sup>, UAS-egr</i>                                 | 24h 30°C, D7 AED       | -        |
| <hr/>       |         |                                                                                                             |                        |          |
| Figure S2   | A       | <i>hsflp<sup>122</sup>; UAS-p35; 10xStat92E&gt;dGFP/Act5C.GAL4 (FRT.CD2), UAS-RFP</i>                       | 10' HS 37°C, D7 AED    | 28h 22°C |
| Figure S2   | B       | <i>hsflp<sup>122</sup>; UAS-p35; 10xStat92E&gt;dGFP/Act5C.GAL4 (FRT.CD2), UAS-RFP</i>                       | 7' HS 37°C, D7 AED     | 28h 22°C |
| Figure S2   | C       | <i>hsflp<sup>122</sup>; UAS-p35/UAS-hep<sup>act</sup>; 10xStat92E&gt;dGFP/Act5C.GAL4 (FRT.CD2), UAS-RFP</i> | 7' HS 37°C, D7 AED     | 28h 22°C |
| Figure S2   | D       | <i>hsflp<sup>122</sup>; UAS-p35; rn(E/F)-EGFP/Act5C.GAL4 (FRT.CD2), UAS-RFP</i>                             | 7' HS 37°C, D7 AED     | 28h 22°C |
| Figure S2   | E,F,G   | <i>TRE-RFP; 10xStat92E&gt;dGFP/rn-GAL4, tub-GAL80<sup>ts</sup></i>                                          | 0h,7h,14h 30°C, D7 AED | -        |
| Figure S2   | H,I,J,K | <i>TRE-RFP; 10xStat92E&gt;dGFP/rn-GAL4, tub-GAL80<sup>ts</sup>, UAS-egr</i>                                 | 0h,7h,14h 30°C, D7 AED | -        |
| Figure S2   | L       | <i>TRE-RFP; 10xStat92E&gt;dGFP/rn-GAL4, tub-GAL80<sup>ts</sup></i>                                          | 7h 30°C, D7 AED        | -        |
| Figure S2   | M       | <i>TRE-RFP; 10xStat92E&gt;dGFP/rn-GAL4, tub-GAL80<sup>ts</sup>, UAS-egr</i>                                 | 7h 30°C, D7 AED        | -        |
| <hr/>       |         |                                                                                                             |                        |          |
| Figure S3   | A, C    | <i>rn-GAL4, tub-GAL80<sup>ts</sup>, UAS-egr</i>                                                             | 24h 30°C, D7 AED       | -        |
| Figure S3   | B, C    | <i>rn-GAL4, tub-GAL80<sup>ts</sup>, UAS-egr; UAS-zfh2<sup>EAB</sup>-mCherry</i>                             | 24h 30°C, D7 AED       | -        |

|             |       |                                                                                                                                                                          |                  |   |
|-------------|-------|--------------------------------------------------------------------------------------------------------------------------------------------------------------------------|------------------|---|
| Figure 4    | A     | <i>10xStat92E&gt;dGFP/UAS-ptp61F RNAi<sup>i2-5</sup>; rn-GAL4, tub-GAL80<sup>ts</sup></i>                                                                                | 24h 30°C, D7 AED | - |
| Figure 4    | B,D,E | <i>10xStat92E&gt;dGFP; rn-GAL4, tub-GAL80<sup>ts</sup>, UAS-egr</i>                                                                                                      | 24h 30°C, D7 AED | - |
| Figure 4    | C,D,E | <i>10xStat92E&gt;dGFP/UAS-ptp61F RNAi<sup>i2-5</sup>; rn-GAL4, tub-GAL80<sup>ts</sup>, UAS-egr</i>                                                                       | 24h 30°C, D7 AED | - |
| Figure 4    | F,J   | <i>CycE-lacZ/10xStat92E&gt;dGFP; rn-GAL4, tub-GAL80<sup>ts</sup></i>                                                                                                     | 24h 30°C, D7 AED | - |
| Figure 4    | G,J   | <i>CycE-lacZ/10xStat92E&gt;dGFP; UAS-Stat92E-3xHA/rn-GAL4, tub-GAL80<sup>ts</sup></i>                                                                                    | 24h 30°C, D7 AED | - |
| Figure 4    | H,J   | <i>CycE-lacZ/10xStat92E&gt;dGFP; rn-GAL4, tub-GAL80<sup>ts</sup>, UAS-egr</i>                                                                                            | 24h 30°C, D7 AED | - |
| Figure 4    | I,J   | <i>CycE-lacZ/10xStat92E&gt;dGFP; UAS-Stat92E-3xHA/rn-GAL4, tub-GAL80<sup>ts</sup>, UAS-egr</i>                                                                           | 24h 30°C, D7 AED | - |
| Figure S4.1 | A     | <i>dome<sup>G0441</sup>;   dome<sup>G0441</sup>;dome-GFP</i>                                                                                                             | 24h 30°C, D7 AED | - |
| Figure S4.1 | B     | <i>hop<sup>34</sup>;   hop<sup>34</sup>;hop-GFP</i>                                                                                                                      | 24h 30°C, D7 AED | - |
| Figure S4.1 | C     | <i>stat<sup>85c9</sup>/TM6c   stat<sup>85c9</sup>/stat<sup>85c9</sup>   Stat92E-GFP; stat<sup>85c9</sup>/TM6c   Stat92E-GFP; stat<sup>85c9</sup>/stat<sup>85c9</sup></i> | 24h 30°C, D7 AED | - |
| Figure S4.1 | D     | <i>Stat92E-GFP   GFP-HP1   w<sup>[118]</sup></i>                                                                                                                         | D7 AED           | - |
| Figure S4.1 | E     | <i>w<sup>[118]</sup></i>                                                                                                                                                 | 24h 30°C, D7 AED | - |
| Figure S4.1 | F     | <i>hop-GFP/TM6B, tub-GAL80</i>                                                                                                                                           | 24h 30°C, D7 AED | - |
| Figure S4.1 | G     | <i>hop-GFP/rn-GAL4, tub-GAL80<sup>ts</sup>, UAS-egr</i>                                                                                                                  | 24h 30°C, D7 AED | - |
| Figure S4.1 | H,J,M | <i>Stat92E-GFP;</i>                                                                                                                                                      | 24h 30°C, D7 AED | - |
| Figure S4.1 | I     | <i>Stat92E-GFP; rn-GAL4, tub-GAL80<sup>ts</sup>, UAS-egr</i>                                                                                                             | 24h 30°C, D7 AED | - |
| Figure S4.1 | K,M   | <i>UAS-p35/Stat92E-GFP; rn-GAL4, tub-GAL80<sup>ts</sup>, UAS-egr</i>                                                                                                     | 24h 30°C, D7 AED | - |
| Figure S4.2 | A     | <i>Su(var)2-10-GFP; rn-GAL4, tub-GAL80<sup>ts</sup></i>                                                                                                                  | 24h 30°C, D7 AED | - |
| Figure S4.2 | B     | <i>Su(var)2-10-GFP; rn-GAL4, tub-GAL80<sup>ts</sup>, UAS-egr</i>                                                                                                         | 24h 30°C, D7 AED | - |
| Figure S4.2 | C     | <i>TRE-RFP; 10xStat92E&gt;dGFP/rn-GAL4, tub-GAL80<sup>ts</sup></i>                                                                                                       | 24h 30°C, D7 AED | - |
| Figure S4.2 | D     | <i>TRE-RFP; 10xStat92E&gt;dGFP/rn-GAL4, tub-GAL80<sup>ts</sup>, UAS-egr</i>                                                                                              | 24h 30°C, D7 AED | - |
| Figure S4.2 | E     | <i>ken-LacZ<sup>02970</sup>;</i>                                                                                                                                         | 24h 30°C, D7 AED | - |
| Figure S4.2 | F     | <i>ken-LacZ<sup>02970</sup>; rn-GAL4, tub-GAL80<sup>ts</sup>, UAS-egr</i>                                                                                                | 24h 30°C, D7 AED | - |
| Figure S4.2 | G     | <i>10xStat92E&gt;dGFP/UAS-ken-RNAi; rn-GAL4, tub-GAL80<sup>ts</sup></i>                                                                                                  | 24h 30°C, D7 AED | - |
| Figure S4.2 | H,K   | <i>10xStat92E&gt;dGFP; rn-GAL4, tub-GAL80<sup>ts</sup>, UAS-egr</i>                                                                                                      | 24h 30°C, D7 AED | - |
| Figure S4.2 | I     | <i>10xStat92E&gt;dGFP/UAS-ken-RNAi; rn-GAL4, tub-GAL80<sup>ts</sup>, UAS-egr</i>                                                                                         | 24h 30°C, D7 AED | - |
| Figure S4.2 | J     | <i>10xStat92E&gt;dGFP; UAS-Su(var)2-10-RNAi/rn-GAL4, tub-GAL80<sup>ts</sup></i>                                                                                          | 24h 30°C, D7 AED | - |
| Figure S4.2 | L     | <i>10xStat92E&gt;dGFP; UAS-Su(var)2-10-RNAi/rn-GAL4, tub-GAL80<sup>ts</sup>, UAS-egr</i>                                                                                 | 24h 30°C, D7 AED | - |
| Figure S4.2 | M     | <i>10xStat92E&gt;dGFP; UAS-apt-RNAi/rn-GAL4, tub-GAL80<sup>ts</sup></i>                                                                                                  | 48h 30°C, D5 AED | - |
| Figure S4.2 | N     | <i>10xStat92E&gt;dGFP; rn-GAL4, tub-GAL80<sup>ts</sup>, UAS-egr</i>                                                                                                      | 48h 30°C, D5 AED | - |
| Figure S4.2 | O     | <i>10xStat92E&gt;dGFP; UAS-apt-RNAi/rn-GAL4, tub-GAL80<sup>ts</sup>, UAS-egr</i>                                                                                         | 48h 30°C, D5 AED | - |
| Figure S4.3 | A,C   | <i>CyO; 10xStat92E&gt;dGFP</i>                                                                                                                                           | D7 AED           | - |
| Figure S4.3 | B,C   | <i>enGAL4, UAS-mRFP.NLS/UAS-ptp61F RNAi; 10xStat92E&gt;dGFP</i>                                                                                                          | D7 AED           | - |
| Figure S4.3 | D     | <i>UAS-GFP; rn-GAL4, tub-GAL80<sup>ts</sup></i>                                                                                                                          | 12h 30°C, D7 AED | - |
| Figure S4.3 | E     | <i>UAS-GFP; UAS-Stat92E-3xHA/rn-GAL4, tub-GAL80<sup>ts</sup></i>                                                                                                         | 12h 30°C, D7 AED | - |
| Figure S4.3 | F     | <i>10xStat92E&gt;dGFP; rn-GAL4, tub-GAL80<sup>ts</sup></i>                                                                                                               | 24h 30°C, D7 AED | - |
| Figure S4.3 | G     | <i>10xStat92E&gt;dGFP/UAS-hop.H; rn-GAL4, tub-GAL80<sup>ts</sup></i>                                                                                                     | 24h 30°C, D7 AED | - |

|             |              |                                                                                                                                    |                  |   |
|-------------|--------------|------------------------------------------------------------------------------------------------------------------------------------|------------------|---|
| Figure S4.3 | H            | <i>10xStat92E&gt;dGFP; rn-GAL4, tub-GAL80<sup>ts</sup>, UAS-egr</i>                                                                | 24h 30°C, D7 AED | - |
| Figure S4.3 | I            | <i>10xStat92E&gt;dGFP/UAS-hop.H; rn-GAL4, tub-GAL80<sup>ts</sup>, UAS-egr</i>                                                      | 24h 30°C, D7 AED | - |
| <hr/>       |              |                                                                                                                                    |                  |   |
| Figure 5    | A,C,D        | <i>TRE-RFP; rn-GAL4, tub-GAL80<sup>ts</sup>, UAS-egr</i>                                                                           | 24h 30°C, D7 AED | - |
| Figure 5    | B,C,D        | <i>TRE-RFP; UAS-Stat92E-3xHA/rn-GAL4, tub-GAL80<sup>ts</sup>, UAS-egr</i>                                                          | 24h 30°C, D7 AED | - |
| Figure 5    | E,G,H        | <i>Ubi-GFP.E2f1<sup>1-230</sup>, Ubi-mRFP1.NLS.CycB<sup>1-266</sup>; rn-GAL4, tub-GAL80<sup>ts</sup></i>                           | 24h 30°C, D7 AED | - |
| Figure 5    | F,G,H        | <i>Ubi-GFP.E2f1<sup>1-230</sup>, Ubi-mRFP1.NLS.CycB<sup>1-266</sup>; UAS-Stat92E-3xHA/rn-GAL4, tub-GAL80<sup>ts</sup>, UAS-egr</i> | 24h 30°C, D7 AED | - |
| Figure 5    | I            | <i>UAS-GFP; rn-GAL4, tub-GAL80<sup>ts</sup>, UAS-egr</i>                                                                           | 24h 30°C, D7 AED | - |
| Figure 5    | J            | <i>UAS-Stat92E-3xHA/rn-GAL4, tub-GAL80<sup>ts</sup>, UAS-egr</i>                                                                   | 24h 30°C, D7 AED | - |
| Figure 5    | K,O,M,N      | <i>UAS-GFP; rn-GAL4, tub-GAL80<sup>ts</sup>, UAS-egr</i>                                                                           | 24h 30°C, D7 AED | - |
| Figure 5    | L,P,M,N      | <i>UAS-GFP/UAS-ptp61F RNAi<sup>i2-5</sup>; rn-GAL4, tub-GAL80<sup>ts</sup>, UAS-egr</i>                                            | 24h 30°C, D7 AED | - |
| <hr/>       |              |                                                                                                                                    |                  |   |
| Figure S5   | A            | <i>UAS-GFP; rn-GAL4, tub-GAL80<sup>ts</sup></i>                                                                                    | 24h 30°C, D7 AED | - |
| Figure S5   | B            | <i>UAS-GFP; UAS-Stat92E-3xHA/rn-GAL4, tub-GAL80<sup>ts</sup></i>                                                                   | 24h 30°C, D7 AED | - |
| Figure S5   | C            | <i>UAS-GFP; rn-GAL4, tub-GAL80<sup>ts</sup>, UAS-egr</i>                                                                           | 24h 30°C, D7 AED | - |
| Figure S5   | D            | <i>UAS-GFP; UAS-Stat92E-3xHA/rn-GAL4, tub-GAL80<sup>ts</sup>, UAS-egr</i>                                                          | 24h 30°C, D7 AED | - |
| Figure S5   | E            | <i>Ubi-GFP.E2f1<sup>1-230</sup>, Ubi-mRFP1.NLS.CycB<sup>1-266</sup>; rn-GAL4, tub-GAL80<sup>ts</sup></i>                           | 24h 30°C, D7 AED | - |
| Figure S5   | F            | <i>Ubi-GFP.E2f1<sup>1-230</sup>, Ubi-mRFP1.NLS.CycB<sup>1-266</sup>; rn-GAL4, tub-GAL80<sup>ts</sup>, UAS-egr</i>                  | 24h 30°C, D7 AED | - |
| Figure S5   | G            | <i>UAS-GFP; rn-GAL4, tub-GAL80<sup>ts</sup></i>                                                                                    | 24h 30°C, D7 AED | - |
| Figure S5   | H            | <i>UAS-Stat92E-3xHA/rn-GAL4, tub-GAL80<sup>ts</sup></i>                                                                            | 24h 30°C, D7 AED | - |
| <hr/>       |              |                                                                                                                                    |                  |   |
| Figure 6    | A            | <i>TRE-RFP; 10xStat92E&gt;dGFP/rn-GAL4, tub-GAL80<sup>ts</sup></i>                                                                 | 44h 30°C, D6 AED | - |
| Figure 6    | B            | <i>UAS-Ras<sup>v12</sup>/TRE-RFP; 10xStat92E&gt;dGFP/rn-GAL4, tub-GAL80<sup>ts</sup></i>                                           | 44h 30°C, D6 AED | - |
| Figure 6    | C,C',G       | <i>UAS-scrib-RNAi/TRE-RFP; 10xStat92E&gt;dGFP/rn-GAL4, tub-GAL80<sup>ts</sup></i>                                                  | 44h 30°C, D6 AED | - |
| Figure 6    | D,D',E,F,H,I | <i>UAS-Ras<sup>v12</sup>,scrib-RNAi/TRE-RFP; 10xStat92E&gt;dGFP/rn-GAL4, tub-GAL80<sup>ts</sup></i>                                | 44h 30°C, D6 AED | - |
| Figure S6.1 | A,E          | <i>TRE-RFP; 10xStat92E&gt;dGFP/rn-GAL4, tub-GAL80<sup>ts</sup></i>                                                                 | 44h 30°C, D6 AED | - |
| Figure S6.1 | B            | <i>UAS-Ras<sup>v12</sup>/TRE-RFP; 10xStat92E&gt;dGFP/rn-GAL4, tub-GAL80<sup>ts</sup></i>                                           | 44h 30°C, D6 AED | - |
| Figure S6.1 | C            | <i>10xStat92E&gt;dGFP/rn-GAL4, tub-GAL80<sup>ts</sup></i>                                                                          | 48h 30°C, D6 AED | - |
| Figure S6.1 | D            | <i>UAS-scrib-RNAi; 10xStat92E&gt;dGFP/rn-GAL4, tub-GAL80<sup>ts</sup></i>                                                          | 48h 30°C, D6 AED | - |
| Figure S6.1 | F            | <i>UAS-scrib-RNAi/TRE-RFP; 10xStat92E&gt;dGFP/rn-GAL4, tub-GAL80<sup>ts</sup></i>                                                  | 44h 30°C, D6 AED | - |
| Figure S6.1 | G,I          | <i>UAS-Ras<sup>v12</sup>,scrib-RNAi/TRE-RFP; 10xStat92E&gt;dGFP/rn-GAL4, tub-GAL80<sup>ts</sup></i>                                | 44h 30°C, D6 AED | - |
| Figure S6.1 | H            | <i>TRE-RFP; 10xStat92E&gt;dGFP/rn-GAL4, tub-GAL80<sup>ts</sup>, UAS-egr</i>                                                        | 44h 30°C, D6 AED | - |

467

468

469

470

## Fly genetics

Fosmids carrying GFP-tagged *hop* (VDRG 318158) and *Stat92E* (BDSC 38670) alleles, expressed proteins at expected molecular weights and, at least partially complemented respective null alleles, suggesting that both GFP-fusion proteins are functional. A potential Dome-GFP fosmid (VDRG 318098) failed to give rise to a GFP protein by immunofluorescence and Western blot analysis and failed to complement a *dome* allele, thus Dome levels could not directly be analyzed. Genetic complementation assays were carried out by crossing the GFP-tagged fosmids into the background of LOF mutants (*dome*<sup>G0441</sup>, *hop*<sup>9p5</sup> and *stat*<sup>85C9</sup>). For X-linked *dome*<sup>G0441</sup> and *hop*<sup>9p5</sup> alleles, we calculated the percentage of hemizygous viable adult males emerging from control and experimental crosses (Fig. S4.1A,B). For the autosomal *stat*<sup>85C9</sup> allele, we determined pupariation success of homozygous mutant larvae by counting the number of pupariated larvae in control and experimental crosses (Fig. S4.1C).

We validated RNAi lines by demonstrating that they caused changes to the developmental pattern of JAK/STAT activity in the hinge if expressed throughout normal wing disc development. Crosses were set as previously described, using the *en-GAL4* driver to express the RNAi in the posterior compartment. Larvae were kept at 18°C till D7 AEL. On D7, early L3 staged larvae were dissected, showing characteristic JAK/STAT reporter activity pattern in the hinge. Following dissection and staining, sibling controls and RNAi expressing discs were mounted on the same slide. All discs were imaged at the same settings and the JAK/STAT reporter intensities were quantified in selected regions in the anterior and posterior hinge (Fig. S4.3C). Intensity values from the anterior compartment (not expressing the RNAi) was used as the internal control.

## Flip-out clones

GAL4/UAS-driven 'flip-out' overexpression experiments utilized heat-shock-driven expression of a flippase to clonally express a UAS construct of choice. After 6h of egg collections, heat-shock was induced on developmental day 5 or 6 at 37°C for 7-10 min. Larvae were dissected at wandering 3rd instar stage or as indicated (28h or 48h after heat-shock, Fig. 2A-D, S2.A-D).

## Genetic cell ablation using Gal4/UAS/Gal80ts

To induce expression of *egr*, experiments were carried out as described in [31, 38, 51] with few modifications. Briefly, larvae of genotype *rn-GAL4*, *tub-GAL80<sup>ts</sup>* and carrying the desired UAS-transgenes were staged with a 6h egg collection and raised at 18°C at a density of 50 larvae/vial. Overexpression of transgenes was induced by shifting the temperature to 30°C for 24h at D7 after egg deposition (AED), and larvae dissected at recovery time point R0 h (Fig.



S1.1C) unless noted otherwise. For time course and tumor experiments, transgenes were induced by shifting the temperature to 30°C for 0h, 7h, 14h or 24h at D7 (Fig. S1.2, 2 and S2), or 44h at D6 (Fig. 6 and S6) respectively. Larvae were subsequently dissected for analysis or allowed to recover at 22°C for the indicated time. All images represent R0 h unless noted otherwise. Control genotypes were either *mt<sup>ts</sup>*, or sibling animals (+*TM6B*, *tubGAL80* or +*TM6c*) (Smith-Bolton et al. 2009). All experiments were performed with ≥ 2 biological replicates.

## Immunohistochemistry

Wing discs from third instar larvae were dissected and fixed for 15 min at room temperature in 4% paraformaldehyde in PBS. Washing steps were performed in PBS containing 0.1% TritonX-100 (PBT). Discs were then incubated with primary antibodies (described in **Table S1**) in PBT, gently mixing overnight at 4°C. Tissues were counterstained with DAPI (0.25 ng/μl, Sigma, D9542), Phalloidin-Alexa Fluor 488/647 (1:100, Life Technologies) or Phalloidin-conjugated TRITC (1:400, Sigma) during incubation with cross-absorbed secondary antibodies coupled to Alexa Fluorophores (Invitrogen or Abcam) at room temperature for 2h. Tissues were mounted using SlowFade Gold Antifade (Invitrogen, S36936). Whenever possible, experimental and control discs were processed in the same vial and mounted on the same slides to ensure comparability in staining between different genotypes. Images were acquired using the Leica TCS SP8 Microscope, using the same confocal settings and processed using tools in Fiji. Of note, all wing discs expressing the *10xStat92E>dGFP* reporter were boosted with an anti-GFP antibody.

## EdU Labelling

EdU incorporation was performed using the Click-iT Plus EdU Alexa Fluor 647 Imaging Kit, (described in **Table S1**) prior to primary antibody incubation. Briefly, larval cuticles were inverted in Schneider's medium and incubated with EdU (10μM final concentration) at RT for 15 minutes. Cuticles were then fixed in 4% PFA/PBS for 15 minutes, washed for 30 minutes in PBT 0.5%. EdU-Click-iT labeling was performed according to manufacturer's guidelines. Tissues were washed in PBT 0.1%, after which immunostainings, sample processing and imaging were carried out as described above.

## Western Blots

Cell lysates from third instar wing imaginal discs and brains were prepared in lysis buffer (50 mM Tris-HCl pH 7.5, 300mM NaCl, 0.1mM EDTA, 1% Triton X-100, 0.1% SDS, 5% Glycerol, 1mM PMSF, 1/10 tablet of Complete Mini Protease Inhibitor Cocktail) on ice. Protein samples were loaded onto a 10% polyacrylamide gel, along with Chameleon Duo Pre-stained Protein

Ladder (LI-COR, P/N 928-60000) as a molecular weight ladder and run at 150V. After SDS-PAGE, proteins were transferred onto a nitrocellulose membrane (Bio-Rad, 162-0115, 0.45µm) in transfer buffer (25 mM Tris, 192 mM glycine, 20% (v/v) methanol) using the wet-tank method with a current density of 300mA for 1h. Prior to antibody incubation, membranes were blocked with 5% milk in PBS. Membrane was incubated with primary antibodies in PBS-T (1% Triton-X in 1xPBS) - rat anti-GFP (Chromotek, 3H9-100, 1:1000) and mouse anti-α-tubulin (Sigma, T9026, 1:5000) on a rotative plate at 4°C overnight. Primary antibodies were removed and washed in dH<sub>2</sub>O twice for 5 mins each. Membrane was then incubated with secondary antibodies diluted in PBS-T - donkey α-mouse secondary (LI-COR, 926-68072, 1:20000) labelled with a 700nm IRDye and goat α-rat (LI-COR, 926-32219, 1:20000) labelled with an 800nm IRDye. Membrane was washed in dH<sub>2</sub>O twice for 5 mins each before detection using the Image Studio Software on the Odyssey SA system (LI-COR) (Fig. S4.1D).

## Image Analysis and Quantification

### General comments

Images were processed, analyzed and quantified using tools in Fiji (ImageJ v2.0.0) [134]. Extreme care was taken to apply consistent methods (i.e. number of projected sections, thresholding methods, processing) for image analysis. Figure panels were assembled using Affinity Designer v1.10. Statistical analyses were performed in Graphpad Prism or R v3.3.3 ([www.R-project.org](http://www.R-project.org)).

### Total disc area quantification

Maximum intensity projections of z-stacks for each disc were obtained in Fiji. Masks were generated after applying a fixed threshold (10-255) to the DAPI channel and noise was reduced using the 'Despeckle' function. Area measurement from the resulting masks were obtained using the 'Measure' function.

### 10xStat92E>dGFP quantification

Maximum intensity projections of selected confocal sections were taken, excluding the peripodium and carefully chosen to capture signaling activity within the disc proper. In the *egr*-expressing or *egr;transgene*-coexpressing discs, a mask of the pouch domain was generated. Region Of Interest (ROI) outlines were either manually drawn on the DAPI channel to include the pouch and hinge domains till the medial hinge fold or by thresholding Nubbin staining. Centroid co-ordinates were identified using the 'Measure' function and marked with a point tool. To measure the fluorescence intensity of the *Stat92E>dGFP* reporter, a square ROI

(25x25µm) was placed centrally over the centroid and mean intensity within the ROI was obtained using the 'Measure' function in Fiji. (Fig. 4)

### **Dcp-1 area quantification**

Maximum intensity projections of stacks for each disc were obtained in Fiji. Masks were obtained by thresholding for signal of interest. Signal to noise ratio was enhanced by 'Remove outliers' (bright, radius = 1.5) or 'Despeckle' functions. The '3D object counter' function was used to obtain surface area of the generated mask. To control for differences arising from the total size of the discs, ratios between the Dcp-1 area and total WID area were obtained for each disc and reported as percentage values. (Fig. 5C,D,M,N)

### **Tracing JNK, JAK/STAT, EdU and Upd reporters profiles**

Partial max projections from confocal stacks of the disc proper were generated, carefully excluding any peripodial signal. For hinge profiles of the JAK/STAT reporter, size-matched discs were chosen and line traces were manually drawn along the hinge using the polygon selection tool. Reporter intensity values from the 'Plot profile' function were averaged for 0h, 7h and 14h control and *egr*-expressing discs and plotted. (Fig. S1.2)

For reporter patterns along disc center to disc periphery, JNK/AP-1 masks were made using thresholding tools and ROI outlines were generated. Based on ROIs, the centroid value was determined and  $n \geq 15$  tracks were drawn from the centroid outwards towards the hinge for a fixed distance - covering the JNK/AP-1 domain, the JNK/AP-1-JAK/STAT interface, and the JAK/STAT signaling domain respectively. Using the 'Plot profile' function in Fiji, the fluorescence intensity values of each reporter was obtained along these tracks and averaged. Reporter patterns for each disc was graphed by scaling the averaged values from each track, between 0 to 1 and plotted on the Y-axis. This was done independently for  $n \geq 3$  discs, and a representative image was selected for visualization of the spatial trends of the reporters. (Fig 1M,N)

### **Density plots for JNK/AP-1 and JAK/STAT reporters**

For combined pouch and hinge regions (Fig. 1I,J), the ROI outlines were manually drawn on the DAPI channel to include the pouch and hinge domains till the medial hinge fold. Partial max projections of z-sections from the disc proper were generated, carefully excluding any peripodial signal.

For time course experiments with *egr*-expressing discs (S2.H-K), a central z-section was chosen and ROIs generated by thresholding the *TRE-RFP* channel to include only the JNK-signaling pouch domain. After applying a 'Gaussian blur' filter (sigma=2), masks were

generated by applying a low fixed threshold (value = 10) based on early, 7h *egr*-expressing discs. Noise removal was done using the 'Despeckle' function, followed by 'Fill Hole' function. ROI outlines were generated using 'Create selection'. All ROIs were placed on the source *TRE>RFP* and *Stat92E>dGFP* reporter channels. 'Save X-Y co-ordinates' function was used to obtain pixel fluorescence intensity values for both reporters within the ROI, and the distribution of fluorescence intensities across the samples were graphed by generating a binned (bins = 16) 2D histogram plot using R. After all NA values were set to 0, data density per bin for each disc was calculated as a percentage. Values were averaged across corresponding bins for all discs within a timepoint to generate the average fluorescence intensity distribution profile. To distinguish regions with low, medium and high signaling for each pathway, the graphs were subdivided into sections s1-s9 by defining a threshold to distinguish low, medium and high JNK/AP-1 and JAK/STAT signal intensities (Fig. S2K). Percentage of datapoints within each section was determined from the averaged fluorescence intensity distribution profile. Ordinary 2-way ANOVA with Dunnett's multiple comparisons test was carried out for statistical analysis. Alpha was set at 0.05

### Cell cycle profiles

Representative sections were selected per disc and a square ROI area (75x75µm<sup>2</sup>) was placed over the central pouch cells. Only viable cells stained with characteristic euchromatic and heterochromatic DAPI staining were chosen. Using the 'Multi point' tool, cells showing a G1 profile (green), G2 profile (yellow+red) or neither (black) were counted. Percentage values for the gap phases were calculated for n≥3 discs per genotype and visualized. T-tests were performed on the calculated G1:G2 ratios per disc. (Fig 5G,H)

### JAK/STAT reporter quantifications for testing RNAi lines

Crosses were setup as previously described and wing discs from larvae were dissected on D7 AED. Single sections at similar focal planes were carefully chosen during imaging. Using drawing tools in Fiji, ROIs were generated to include JAK/STAT signaling cells in the hinge within A and P compartments. The mean JAK/STAT reporter intensity within the ROI was obtained from control and RNAi expressing discs using the 'Measure' function in Fiji. For each dataset, paired t-tests were performed between A and P fluorescence intensity values for the same genotype. (Fig. S4.3A-C)

### Nuclear translocation of Stat92E-GFP

Images from the pouch (n=12) and hinge (n=9) domains of control discs and pouch (n=16) and hinge (n=12) domains of *p35+egr* expressing discs were obtained to track the intra-cellular localization of *Stat92E-GFP* within the nucleus and cytoplasm. Images were taken at high

magnification (63x). After thresholding ('Huang'), the selection tool was used to generate a nuclear ROI using the DAPI channel. The inverse selection tool was used to generate a corresponding cytoplasmic ROI for each image (Fig S4.1L). These nuclear and cytoplasmic ROIs were then placed on the *Stat92E-GFP* channel and mean fluorescence intensity values were obtained for each subcellular fraction and unpaired t-tests were performed. (Fig. S4.1M)

### **MMP-1 intensity quantification**

To measure the fluorescence intensity of MMP-1 in *egr*-expressing and *egr,zfh2*-coexpressing discs, maximum intensity projections of confocal sections were taken. Sections were carefully chosen to capture JNK/AP-1 signaling activity in the disc proper, avoiding the peripodium and cell debris. Square ROIs of fixed length (30  $\mu$ m) were placed in 3 non-overlapping regions in the pouch domain, and mean intensity was calculated using the 'Measure' function in Fiji. Mean fluorescence intensities obtained from ROIs were averaged per disc and values from each disc per genotype were used for statistical analysis. (Fig. S3A-C)

### **JNK<sup>+</sup> and JNK<sup>-</sup> Area and intensity quantifications (*Ras*<sup>v12</sup>,*scrib*-RNAi tumors)**

A representative z-section was selected per disc. As our interest was in quantitating the spatial segregation, only JNK/AP-1 or JAK/STAT signaling regions in the tumor were chosen. After applying a 'Gaussian blur' filter (sigma=2), 'Moments' thresholding and 'Despeckle' function for noise correction was applied to generate masks for regions showing *TRE>RFP* (JNK) and *Stat92E>dGFP* (JAK/STAT) reporter activity. From the 'Image calculator' function, 'AND' and 'Subtract' operations on JNK/AP-1 and STAT masks were carried out to obtain the JNK<sup>+</sup>STAT<sup>+</sup> mask, and the exclusive JNK<sup>+</sup> (JNK-STAT) or exclusive JNK<sup>-</sup>(STAT-JNK) masks respectively. Area of each mask was obtained using the 'Measure' function. Summed area of these masks were considered as the total area and each area was then represented as a percentage of total. One-way paired ANOVA with Holm-Šidák's multiple comparison test was performed to test for statistical significance. Mean intensity for *TRE>RFP* or *10xStat92E>dGFP* reporters were measured inside the JNK/AP-1 mask (JNK<sup>+</sup>) and the exclusive JNK<sup>-</sup> masks. Paired t-tests were performed to test for statistical significance. (Fig. 6E,F and S6I)

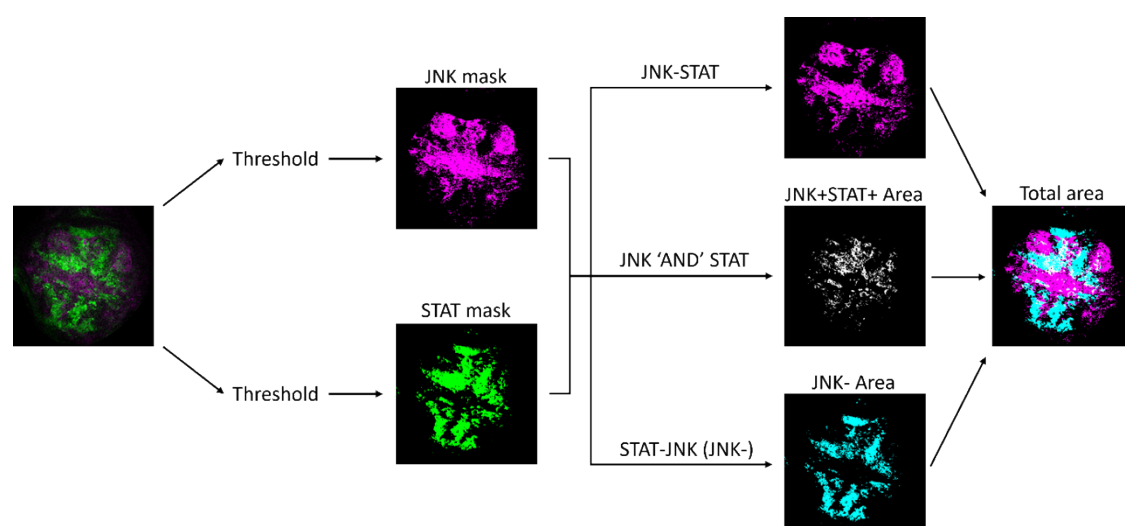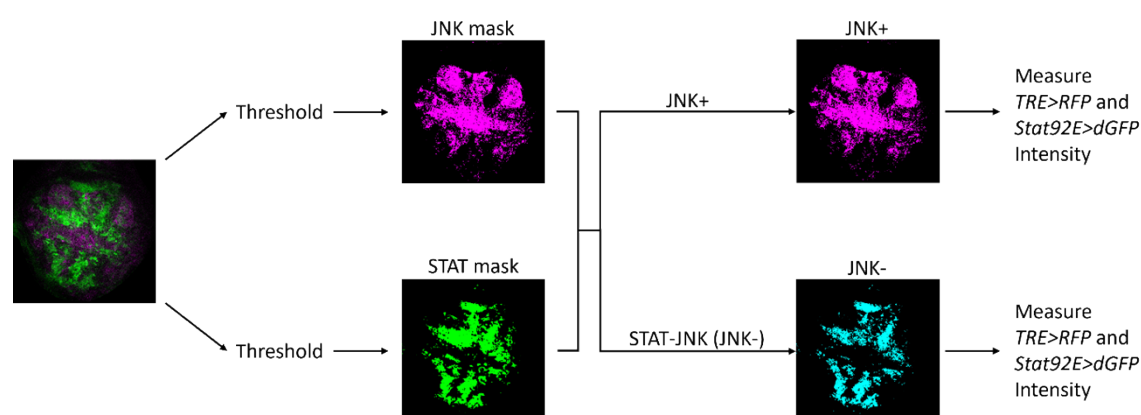

# **ph3 counts**

Partial maximum intensity projection of three central z-sections were taken per disc. To generate masks for regions showing *Stat92E>dGFP* reporter activity (STAT<sup>+</sup>), a 'Gaussian blur' filter (sigma=1), 'Moments' threshold and 'Despeckle' function for noise correction was applied. The DAPI channel was used to manually outline the pouch domain and generate masks. Using the 'Image calculator' function, STAT<sup>+</sup> mask was 'Subtract'-ed from the pouch mask to generate the STAT<sup>-</sup> mask. Areas of the STAT<sup>+</sup> and STAT<sup>-</sup> regions in the pouch were obtained using the 'Measure' function. Then, the ph3 channel was duplicated and 'Li' threshold was applied. 'Remove outlier' (radius=5 threshold=50) and 'Despeckle' function for noise correction, followed by 'Watershed' function was applied to generate a ph3 mask. Using the 'AND' operator, the ph3 mask was overlayed with the STAT<sup>+</sup> and STAT<sup>-</sup> masks. '3D object counter' function was then used to obtain ph3 'Object counts' within the STAT<sup>+</sup> and STAT<sup>-</sup> regions and divided by area of each ROI to get the ph3 counts per mm<sup>2</sup>. Paired t-tests were performed to test for statistical significance. (Fig. 6I)



## Mathematical modelling

To test for the existence of a regulatory motif within our signaling network, a mathematical model was derived to describe the temporal dynamics of the concentration of specific molecules over a fixed 2D space. The system was modeled as a set of ordinary differential equations (ODEs) (see also Fig. 3C). Two sets of modeling equations were established, that reflected conditions which include or exclude repression of JAK/STAT by JNK. The term describing repression of JAK/STAT (referred to as ‘JAK’ in the modeling equations and hereafter) by JNK/AP-1 is highlighted in red.

Uni-directional repression model (see also Fig. 3B):

$$\begin{aligned}\frac{dEIG(t, x)}{dt} &= b_{EIG}(x) - k_{deg, EIG}EIG + k_{act, EIG} \frac{JNK^{n_1}}{K_{m, act, EIG}^{n_1} + JNK^{n_1}} + D_{EIG}\nabla^2 EIG \\ \frac{dJNK(t, x)}{dt} &= b_{JNK} - k_{deg, JNK}JNK + k_{act, JNK} \frac{EIG^{n_2}}{(K_{m, act, JNK}^{n_2} + EIG^{n_2})(1 + k_{inh, JNK, by, JAK}^{ni_1} JAK^{ni_1})} \\ \frac{dJAK(t, x)}{dt} &= b_{JAK} - k_{deg, JAK}JAK + k_{act, JAK} \frac{JAK^{n_3}}{(K_{m, act, JAK}^{n_3} + JAK^{n_3})} \\ \frac{dUPD(t, x)}{dt} &= b_{UPD} - k_{deg, UPD}UPD + k_{act, UPD} \frac{JNK^{n_4}}{K_{m, act, UPD}^{n_4} + JNK^{n_4}} + D_{UPD}\nabla^2 UPD\end{aligned}$$

Mutual repression model (see also Fig. 3B’):

$$\begin{aligned}\frac{dEIG(t, x)}{dt} &= b_{EIG}(x) - k_{deg, EIG}EIG + k_{act, EIG} \frac{JNK^{n_1}}{K_{m, act, EIG}^{n_1} + JNK^{n_1}} + D_{EIG}\nabla^2 EIG \\ \frac{dJNK(t, x)}{dt} &= b_{JNK} - k_{deg, JNK}JNK + k_{act, JNK} \frac{EIG^{n_2}}{(K_{m, act, JNK}^{n_2} + EIG^{n_2})(1 + k_{inh, JNK, by, JAK}^{ni_1} JAK^{ni_1})} \\ \frac{dJAK(t, x)}{dt} &= b_{JAK} - k_{deg, JAK}JAK + k_{act, JAK} \frac{JAK^{n_3}}{(K_{m, act, JAK}^{n_3} + JAK^{n_3})(1 + k_{inh, JAK, by, JNK}^{ni_2} JNK^{ni_2})} \\ \frac{dUPD(t, x)}{dt} &= b_{UPD} - k_{deg, UPD}UPD + k_{act, UPD} \frac{JNK^{n_4}}{K_{m, act, UPD}^{n_4} + JNK^{n_4}} + D_{UPD}\nabla^2 UPD\end{aligned}$$

Characteristic units are represented by state (u), space (x) and time (t). The mathematical terms include, among others, basal rate of production ( $b$ ), activation rate ( $k_{act}$ ), linear degradation rate ( $k_{deg}$ ), Michaelis–Menten constant ( $K_m$ ), inhibition constant ( $k_{inh}$ ), diffusion coefficients ( $D_{EIG}$ ,  $D_{UPD}$ ), Hill co-efficients to model cooperativity ( $n_1, n_2, n_3, n_4$ ,  $ni_1, ni_2$ ) and Hill kinetics to describe self-amplification and mutual repression.

The first equation describes the dynamics of the concentration of Egr, produced at a basal rate dependent on the spatial co-ordinate x and degraded at a linear rate. Hill kinetics describe the production of Egr induced by JNK/AP-1 and its diffusion away from the source. The second equation describes the dynamics of the concentration of the JNK/AP-1 TF, produced at a basal rate and degraded linearly. Hill kinetics describe production of JNK/AP-1 induced by *egr* as well as inhibition of JNK/AP-1 by JAK [51]. The third equation describes the dynamics of the

concentration of the JAK TF, produced at a basal rate and degraded linearly. Hill kinetics describe positive feedback dependent on Upd. Inhibition of JAK by JNK/AP-1 is described and the model is tested with and without this mathematical term (highlighted in red) to check if this interaction exists within the system. The fourth equation describes the dynamics of the concentration of Upd, produced at a basal rate and degraded linearly. Hill kinetics describe the production of Upd induced by JNK/AP-1 and its diffusion [28, 48, 51].

Technically, the modeling was done based on a non-dimensionalized version of the model, rescaled to reduce the number of free parameters. The system was then defined as follows:

$$\begin{aligned} \frac{dEIG(t, x)}{dt} &= \gamma \left( 1(x) - EIG + k_{act, EIG} \frac{JNK^{n_1}}{K_{m, act, EIG} + JNK^{n_1}} \right) + \nabla^2 EIG \\ \frac{dJNK(t, x)}{dt} &= \gamma \left( 1 - k_{deg, JNK} JNK + k_{act, JNK} \frac{EIG^{n_2}}{(K_{m, act, JNK} + EIG^{n_2})(1 + k_{inh, JNK, by, JAK}^{n_{i1}} JAK^{n_{i1}})} \right) \\ \frac{dJAK(t, x)}{dt} &= \gamma \left( 1 - k_{deg, JAK} JAK + k_{act, JAK} \frac{UPD}{(K_{m, act, JAK} + JAK^{n_3})(1 + k_{inh, JAK, by, JNK}^{n_{i2}} JNK^{n_{i2}})} \right) \\ \frac{dUPD(t, x)}{dt} &= \gamma \left( 1 - k_{deg, UPD} UPD + k_{act, UPD} \frac{JNK^{n_4}}{K_{m, act, UPD} + JNK^{n_4}} \right) + d \nabla^2 UPD \end{aligned}$$

For each dimensionless parameter, the parameter dependencies and the scanned parameter range are represented in the table below:

| Dimensionless parameter       | Functional relation to systems parameter         | Scanned parameter range |
|-------------------------------|--------------------------------------------------|-------------------------|
| $\gamma$                      | $k_{deg, EIG} L^2 / D_{EIG}$                     | 0.01 ... 10000          |
| $\hat{k}_{deg, JNK}$          | $k_{deg, JNK} / k_{deg, EIG}$                    | 0.01 ... 10000          |
| $\hat{k}_{deg, JAK}$          | $k_{deg, JAK} / k_{deg, EIG}$                    | 0.01 ... 10000          |
| $\hat{k}_{deg, UPD}$          | $k_{deg, UPD} / k_{deg, EIG}$                    | 0.01 ... 10000          |
| $\hat{k}_{act, EIG}$          | $k_{act, EIG} / b_{EIG}$                         | 0.00001 ... 10          |
| $\hat{k}_{act, JNK}$          | $k_{act, JNK} / b_{JNK}$                         | 0.01 ... 10000          |
| $\hat{k}_{act, JAK}$          | $k_{act, JAK} D_{EIG} / L^2 / b_{UPD} / b_{JAK}$ | 0.01 ... 10000          |
| $\hat{k}_{act, UPD}$          | $k_{act, UPD} / b_{UPD}$                         | 0.01 ... 10000          |
| $\hat{K}_{m, act, EIG}$       | $K_{m, act, EIG} D_{EIG} / L^2 / b_{EIG}$        | 0.00001 ... 10          |
| $\hat{K}_{m, act, JNK}$       | $K_{m, act, JNK} D_{EIG} / L^2 / b_{JNK}$        | 0.01 ... 10000          |
| $\hat{K}_{m, act, JAK}$       | $K_{m, act, JAK} D_{EIG} / L^2 / b_{JAK}$        | 0.01 ... 10000          |
| $\hat{K}_{m, act, UPD}$       | $K_{m, act, UPD} D_{EIG} / L^2 / b_{UPD}$        | 0.01 ... 10000          |
| $\hat{k}_{inh, JAK, by, JNK}$ | $k_{inh, JAK, by, JNK} b_{JAK} L^2 / D_{EIG}$    | 0.01 ... 10000          |
| $\hat{k}_{inh, JNK, by, JAK}$ | $k_{inh, JNK, by, JAK} b_{JNK} L^2 / D_{EIG}$    | 0.01 ... 10000          |
| $\hat{n}_i$                   | $n_i$                                            | 1 ... 4                 |
| $d$                           | $D_{UPD} / D_{EIG}$                              | 1.5 ... 4               |

We performed a global analysis by sampling approach introduced in *Rausenberger et. al* [135]. The models were simulated on a 1D spatial domain  $x = [0, 1]$ . To represent the wound site, a high basal production of Egr was fixed within a finite space at  $x = [0, 0.05]$ , while basal rate of production of Egr for the rest of the region was set to zero. The rate of production of Upd was defined as a function of JNK/AP-1 activity [18, 20, 39, 51]. For all states, initial condition was set as  $u(t=0, x) = 0.1$ . Solutions for each model (with and without repression) were simulated using  $10^6$  parameter sets, drawn uniformly from an interval from  $10^{-3}$  to  $10^{+2}$  on a logarithmic scale, and tested under different conditions of diffusion –  $D_{Upd} > D_{Egr}$ ,  $D_{Upd} < D_{Egr}$  and  $D_{Upd} = D_{Egr}$ . The resulting solutions were automatically scored for countergradient endpoint features extracted from the experimentally observed gradient patterns.

Using this approach [135], positive solutions for a generic bistable pattern from the scanned parameter range were automatically extracted based on the following features:

- i. JAK at  $x = 0$  lower than JAK at  $x = 1$
- ii. JNK/AP-1 at  $x = 0$  higher than JNK/AP-1 at  $x = 1$
- iii. Relative difference of JAK higher than 10%
- iv. Relative difference of JNK/AP-1 higher than 10%

Positive solutions for a specific bistable pattern which mimics biologically observed patterns were automatically extracted based on the additional features:

- v. JAK has a local maximum which is not at the boundary of the simulated domain
- vi. Height of local JAK maximum at least 5%

## **Author Contributions**

Conceptualization JJ, VW, AKC  
Validation JJ, AA, IG, AKC  
Investigation JJ, RE, AA, CC, AKC  
Writing JJ, VW, RE, JT, AKC  
Visualization JJ, RE, VW, AKC  
Supervision JT, AKC  
Funding Acquisition AKC

## **Acknowledgements**

We thank the LIC facility (University of Freiburg) for technical help with imaging. We thank Erika Bach, David Bilder, Dirk Bohmann, Stephen Cohen, Fernando Diaz-Benjumea, Iswar Hariharan, Norbert Perrimon, Helena Richardson, Reinhardt Schuh, Y. Henry Sun, Mirka Uhlirova and Pelin Volkan for sharing reagents and the Bloomington Drosophila Stock Center (BDSC), the Vienna Drosophila Stock Collection (VDRC), the University of Zurich ORFeome Project (FlyORF), the Developmental Studies Hybridoma Bank (DSHB) and the Monoclonal Antibody Core Facility at the Helmholtz Zentrum Munich for providing fly stocks and antibodies. Thanks to Florian Steinberg (University of Freiburg) for support with protocol, reagents and imaging equipment for Western blot assays. We also thank the SGBM graduate school for support.

## **Funding**

Funding for this work was provided by the Deutsche Forschungsgemeinschaft (DFG, German Research Foundation) under Germany's Excellence Strategy (CIBSS – EXC-2189 – Project ID 390939984), the Emmy Noether Programme (CL490/1-1), the Heisenberg Program (CL490/3-1) and by the Boehringer Ingelheim Foundation (Plus3 Programme).

# References

1. Shaw TJ, Martin P. Wound repair at a glance. *J Cell Sci.* 2009;122(Pt 18):3209-13. Epub 2009/09/04. doi: 10.1242/jcs.031187. PubMed PMID: 19726630; PubMed Central PMCID: PMCPMC2736861.
2. Marchiando AM, Graham WV, Turner JR. Epithelial barriers in homeostasis and disease. *Annu Rev Pathol.* 2010;5:119-44. doi: 10.1146/annurev.pathol.4.110807.092135. PubMed PMID: 20078218.
3. Eming SA, Martin P, Tomic-Canic M. Wound repair and regeneration: mechanisms, signaling, and translation. *Sci Transl Med.* 2014;6(265):265sr6. Epub 2014/12/05. doi: 10.1126/scitranslmed.3009337. PubMed PMID: 25473038; PubMed Central PMCID: PMCPMC4973620.
4. Neves J, Demaria M, Campisi J, Jasper H. Of flies, mice, and men: evolutionarily conserved tissue damage responses and aging. *Dev Cell.* 2015;32(1):9-18. Epub 2015/01/15. doi: 10.1016/j.devcel.2014.11.028. PubMed PMID: 25584795; PubMed Central PMCID: PMCPMC4450349.
5. Niethammer P. The early wound signals. *Curr Opin Genet Dev.* 2016;40:17-22. Epub 2016/06/05. doi: 10.1016/j.gde.2016.05.001. PubMed PMID: 27266971; PubMed Central PMCID: PMCPMC5278878.
6. Hotamisligil GS, Davis RJ. Cell Signaling and Stress Responses. *Cold Spring Harb Perspect Biol.* 2016;8(10). Epub 2016/10/05. doi: 10.1101/cshperspect.a006072. PubMed PMID: 27698029.
7. Ayello EA, Dowsett C, Schultz GS, Sibbald RG, Falanga V, Harding K, et al. TIME heals all wounds. *Nursing.* 2004;34(4):36-41; quiz, -2. Epub 2004/07/13. doi: 10.1097/00152193-200404000-00040. PubMed PMID: 15247672.
8. Schafer M, Werner S. Oxidative stress in normal and impaired wound repair. *Pharmacol Res.* 2008;58(2):165-71. Epub 2008/06/19. doi: 10.1016/j.phrs.2008.06.004. PubMed PMID: 18617006.
9. Wilkinson HN, Hardman MJ. Wound healing: cellular mechanisms and pathological outcomes. *Open Biol.* 2020;10(9):200223. Epub 2020/09/30. doi: 10.1098/rsob.200223. PubMed PMID: 32993416; PubMed Central PMCID: PMCPMC7536089.
10. Martin P, Nunan R. Cellular and molecular mechanisms of repair in acute and chronic wound healing. *Br J Dermatol.* 2015;173(2):370-8. Epub 2015/07/14. doi: 10.1111/bjd.13954. PubMed PMID: 26175283; PubMed Central PMCID: PMCPMC4671308.

- 833 11. Dvorak HF. Tumors: wounds that do not heal. Similarities between tumor stroma generation  
834 and wound healing. *N Engl J Med*. 1986;315(26):1650-9. Epub 1986/12/25. doi:  
835 10.1056/NEJM198612253152606. PubMed PMID: 3537791.
- 836 12. Coussens LM, Werb Z. Inflammation and cancer. *Nature*. 2002;420(6917):860-7. Epub  
837 2002/12/20. doi: 10.1038/nature01322. PubMed PMID: 12490959; PubMed Central PMCID:  
838 PMCPMC2803035.
- 839 13. Rybinski B, Franco-Barraza J, Cukierman E. The wound healing, chronic fibrosis, and cancer  
840 progression triad. *Physiol Genomics*. 2014;46(7):223-44. Epub 2014/02/13. doi:  
841 10.1152/physiolgenomics.00158.2013. PubMed PMID: 24520152; PubMed Central PMCID:  
842 PMCPMC4035661.
- 843 14. Lee JH, Lee CW, Park SH, Choe KM. Spatiotemporal regulation of cell fusion by JNK and  
844 JAK/STAT signaling during *Drosophila* wound healing. *J Cell Sci*. 2017;130(11):1917-28. Epub  
845 20170419. doi: 10.1242/jcs.187658. PubMed PMID: 28424232.
- 846 15. Purice MD, Ray A, Munzel EJ, Pope BJ, Park DJ, Speese SD, et al. A novel *Drosophila* injury  
847 model reveals severed axons are cleared through a Draper/MMP-1 signaling cascade. *Elife*. 2017;6.  
848 Epub 2017/08/22. doi: 10.7554/eLife.23611. PubMed PMID: 28825401; PubMed Central PMCID:  
849 PMCPMC5565368.
- 850 16. Ahmed-de-Prado S, Diaz-Garcia S, Baonza A. JNK and JAK/STAT signalling are required for  
851 inducing loss of cell fate specification during imaginal wing discs regeneration in *Drosophila*  
852 *melanogaster*. *Dev Biol*. 2018. Epub 2018/06/06. doi: 10.1016/j.ydbio.2018.05.021. PubMed PMID:  
853 29870691.
- 854 17. Worley MI, Alexander LA, Hariharan IK. CtBP impedes JNK- and Upd/STAT-driven cell fate  
855 misspecifications in regenerating *Drosophila* imaginal discs. *Elife*. 2018;7. Epub 2018/01/27. doi:  
856 10.7554/eLife.30391. PubMed PMID: 29372681.
- 857 18. Wu M, Pastor-Pareja JC, Xu T. Interaction between Ras(V12) and scribbled clones induces  
858 tumour growth and invasion. *Nature*. 2010;463(7280):545-8. Epub 2010/01/15. doi:  
859 10.1038/nature08702. PubMed PMID: 20072127; PubMed Central PMCID: PMCPMC2835536.
- 860 19. Woodfield SE, Graves HK, Hernandez JA, Bergmann A. De-regulation of JNK and JAK/STAT  
861 signaling in ESCRT-II mutant tissues cooperatively contributes to neoplastic tumorigenesis. *PLoS*  
862 *One*. 2013;8(2):e56021. doi: 10.1371/journal.pone.0056021. PubMed PMID: 23418496; PubMed  
863 Central PMCID: PMCPMC3572140.



20. Bunker BD, Nellimoottil TT, Boileau RM, Classen AK, Bilder D. The transcriptional response to tumorigenic polarity loss in *Drosophila*. *Elife*. 2015;4. Epub 20150226. doi: 10.7554/eLife.03189. PubMed PMID: 25719210; PubMed Central PMCID: PMC4369581.
21. Atkins M, Potier D, Romanelli L, Jacobs J, Mach J, Hamaratoglu F, et al. An Ectopic Network of Transcription Factors Regulated by Hippo Signaling Drives Growth and Invasion of a Malignant Tumor Model. *Curr Biol*. 2016;26(16):2101-13. Epub 2016/08/02. doi: 10.1016/j.cub.2016.06.035. PubMed PMID: 27476594.
22. Yang SA, Portilla JM, Mihailovic S, Huang YC, Deng WM. Oncogenic Notch Triggers Neoplastic Tumorigenesis in a Transition-Zone-like Tissue Microenvironment. *Dev Cell*. 2019;49(3):461-72 e5. Epub 2019/04/16. doi: 10.1016/j.devcel.2019.03.015. PubMed PMID: 30982664; PubMed Central PMCID: PMC6504601.
23. Hamaratoglu F, Atkins M. Rounding up the Usual Suspects: Assessing Yorkie, AP-1, and Stat Coactivation in Tumorigenesis. *Int J Mol Sci*. 2020;21(13). Epub 20200627. doi: 10.3390/ijms21134580. PubMed PMID: 32605129; PubMed Central PMCID: PMC7370090.
24. Ramet M, Lanot R, Zachary D, Manfrulli P. JNK signaling pathway is required for efficient wound healing in *Drosophila*. *Dev Biol*. 2002;241(1):145-56. Epub 2002/01/11. doi: 10.1006/dbio.2001.0502. PubMed PMID: 11784101.
25. Bosch M, Serras F, Martin-Blanco E, Baguna J. JNK signaling pathway required for wound healing in regenerating *Drosophila* wing imaginal discs. *Dev Biol*. 2005;280(1):73-86. Epub 2005/03/16. doi: 10.1016/j.ydbio.2005.01.002. PubMed PMID: 15766749.
26. Mattila J, Omelyanchuk L, Kytala S, Turunen H, Nokkala S. Role of Jun N-terminal Kinase (JNK) signaling in the wound healing and regeneration of a *Drosophila melanogaster* wing imaginal disc. *Int J Dev Biol*. 2005;49(4):391-9. Epub 2005/06/22. doi: 10.1387/ijdb.052006jm. PubMed PMID: 15968584.
27. Finkel T. Signal transduction by reactive oxygen species. *J Cell Biol*. 2011;194(1):7-15. Epub 2011/07/13. doi: 10.1083/jcb.201102095. PubMed PMID: 21746850; PubMed Central PMCID: PMC3135394.
28. Santabarbara-Ruiz P, Lopez-Santillan M, Martinez-Rodriguez I, Binagui-Casas A, Perez L, Milan M, et al. ROS-Induced JNK and p38 Signaling Is Required for Unpaired Cytokine Activation during *Drosophila* Regeneration. *PLoS Genet*. 2015;11(10):e1005595. Epub 20151023. doi: 10.1371/journal.pgen.1005595. PubMed PMID: 26496642; PubMed Central PMCID: PMC4619769.

- 896 29. Moreno E, Yan M, Basler K. Evolution of TNF signaling mechanisms: JNK-dependent  
897 apoptosis triggered by Eiger, the Drosophila homolog of the TNF superfamily. *Curr Biol.*  
898 2002;12(14):1263-8. Epub 2002/08/15. PubMed PMID: 12176339.
- 899 30. Kanda H, Miura M. Regulatory roles of JNK in programmed cell death. *J Biochem.*  
900 2004;136(1):1-6. Epub 2004/07/23. doi: 10.1093/jb/mvh098. PubMed PMID: 15269233.
- 901 31. Cosolo A, Jaiswal J, Csordas G, Grass I, Uhlirova M, Classen AK. JNK-dependent cell cycle  
902 stalling in G2 promotes survival and senescence-like phenotypes in tissue stress. *Elife.* 2019;8. Epub  
903 20190208. doi: 10.7554/eLife.41036. PubMed PMID: 30735120; PubMed Central PMCID:  
904 PMCPMC6389326.
- 905 32. Ryoo HD, Gorenc T, Steller H. Apoptotic cells can induce compensatory cell proliferation  
906 through the JNK and the Wingless signaling pathways. *Dev Cell.* 2004;7(4):491-501. Epub  
907 2004/10/08. doi: 10.1016/j.devcel.2004.08.019. PubMed PMID: 15469838.
- 908 33. Morata G, Shlevkov E, Perez-Garijo A. Mitogenic signaling from apoptotic cells in Drosophila.  
909 *Dev Growth Differ.* 2011;53(2):168-76. Epub 2011/02/23. doi: 10.1111/j.1440-169X.2010.01225.x.  
910 PubMed PMID: 21338343.
- 911 34. Tournier C. The 2 Faces of JNK Signaling in Cancer. *Genes Cancer.* 2013;4(9-10):397-400.  
912 Epub 2013/12/19. doi: 10.1177/1947601913486349. PubMed PMID: 24349637; PubMed Central  
913 PMCID: PMCPMC3863340.
- 914 35. Pinal N, Calleja M, Morata G. Pro-apoptotic and pro-proliferation functions of the JNK pathway  
915 of Drosophila: roles in cell competition, tumorigenesis and regeneration. *Open Biol.* 2019;9(3):180256.  
916 Epub 2019/03/07. doi: 10.1098/rsob.180256. PubMed PMID: 30836847; PubMed Central PMCID:  
917 PMCPMC6451367.
- 918 36. La Marca JE, Richardson HE. Two-Faced: Roles of JNK Signalling During Tumourigenesis in  
919 the Drosophila Model. *Front Cell Dev Biol.* 2020;8:42. Epub 2020/03/03. doi:  
920 10.3389/fcell.2020.00042. PubMed PMID: 32117973; PubMed Central PMCID: PMCPMC7012784.
- 921 37. Ruiz-Losada M, Gonzalez R, Peropadre A, Gil-Galvez A, Tena JJ, Baonza A, et al.  
922 Coordination between cell proliferation and apoptosis after DNA damage in Drosophila. *Cell Death*  
923 *Differ.* 2021. Epub 20211125. doi: 10.1038/s41418-021-00898-6. PubMed PMID: 34824391.
- 924 38. Smith-Bolton RK, Worley MI, Kanda H, Hariharan IK. Regenerative growth in Drosophila  
925 imaginal discs is regulated by Wingless and Myc. *Dev Cell.* 2009;16(6):797-809. doi:  
926 10.1016/j.devcel.2009.04.015. PubMed PMID: 19531351; PubMed Central PMCID:  
927 PMCPMC2705171.

- 928 39. Jiang H, Patel PH, Kohlmaier A, Grenley MO, McEwen DG, Edgar BA. Cytokine/Jak/Stat  
929 signaling mediates regeneration and homeostasis in the Drosophila midgut. *Cell*. 2009;137(7):1343-  
930 55. Epub 2009/07/01. doi: 10.1016/j.cell.2009.05.014. PubMed PMID: 19563763; PubMed Central  
931 PMCID: PMCPMC2753793.
- 932 40. Bergantinos C, Corominas M, Serras F. Cell death-induced regeneration in wing imaginal  
933 discs requires JNK signalling. *Development*. 2010;137(7):1169-79. doi: 10.1242/dev.045559. PubMed  
934 PMID: 20215351.
- 935 41. Harrison DA, McCoon PE, Binari R, Gilman M, Perrimon N. Drosophila unpaired encodes a  
936 secreted protein that activates the JAK signaling pathway. *Genes Dev*. 1998;12(20):3252-63. Epub  
937 1998/10/24. doi: 10.1101/gad.12.20.3252. PubMed PMID: 9784499; PubMed Central PMCID:  
938 PMCPMC317220.
- 939 42. Hombria JC, Brown S, Hader S, Zeidler MP. Characterisation of Upd2, a Drosophila  
940 JAK/STAT pathway ligand. *Dev Biol*. 2005;288(2):420-33. Epub 2005/11/10. doi:  
941 10.1016/j.ydbio.2005.09.040. PubMed PMID: 16277982.
- 942 43. Agaisse H, Petersen UM, Boutros M, Mathey-Prevot B, Perrimon N. Signaling role of  
943 hemocytes in Drosophila JAK/STAT-dependent response to septic injury. *Dev Cell*. 2003;5(3):441-50.  
944 Epub 2003/09/12. doi: 10.1016/s1534-5807(03)00244-2. PubMed PMID: 12967563.
- 945 44. Gilbert MM, Weaver BK, Gergen JP, Reich NC. A novel functional activator of the Drosophila  
946 JAK/STAT pathway, unpaired2, is revealed by an in vivo reporter of pathway activation. *Mech Dev*.  
947 2005;122(7-8):939-48. Epub 2005/06/01. doi: 10.1016/j.mod.2005.03.004. PubMed PMID: 15925495.
- 948 45. Toggweiler J, Willecke M, Basler K. The transcription factor Ets21C drives tumor growth by  
949 cooperating with AP-1. *Sci Rep*. 2016;6:34725. Epub 2016/10/08. doi: 10.1038/srep34725. PubMed  
950 PMID: 27713480; PubMed Central PMCID: PMCPMC5054425.
- 951 46. Classen AK, Bunker BD, Harvey KF, Vaccari T, Bilder D. A tumor suppressor activity of  
952 Drosophila Polycomb genes mediated by JAK-STAT signaling. *Nat Genet*. 2009;41(10):1150-5. Epub  
953 2009/09/13. doi: 10.1038/ng.445. PubMed PMID: 19749759; PubMed Central PMCID:  
954 PMCPMC2782793.
- 955 47. Davie K, Jacobs J, Atkins M, Potier D, Christiaens V, Halder G, et al. Discovery of  
956 transcription factors and regulatory regions driving in vivo tumor development by ATAC-seq and  
957 FAIRE-seq open chromatin profiling. *PLoS Genet*. 2015;11(2):e1004994. doi:  
958 10.1371/journal.pgen.1004994. PubMed PMID: 25679813; PubMed Central PMCID:  
959 PMCPMC4334524.

960 48. Katsuyama T, Comoglio F, Seimiya M, Cabuy E, Paro R. During Drosophila disc regeneration,  
961 JAK/STAT coordinates cell proliferation with Dilp8-mediated developmental delay. *Proc Natl Acad Sci*  
962 U S A. 2015;112(18):E2327-36. Epub 20150420. doi: 10.1073/pnas.1423074112. PubMed PMID:  
963 25902518; PubMed Central PMCID: PMC4426433.

964 49. Pastor-Pareja JC, Wu M, Xu T. An innate immune response of blood cells to tumors and  
965 tissue damage in Drosophila. *Dis Model Mech*. 2008;1(2-3):144-54; discussion 53. Epub 20080918.  
966 doi: 10.1242/dmm.000950. PubMed PMID: 19048077; PubMed Central PMCID: PMC2562178.

967 50. Lin G, Xu N, Xi R. Paracrine Unpaired Signaling through the JAK/STAT Pathway Controls  
968 Self-renewal and Lineage Differentiation of Drosophila Intestinal Stem Cells. *J Mol Cell Biol*. 2009.  
969 Epub 2009/10/03. doi: mjp028 [pii]  
970 10.1093/jmcb/mjp028. PubMed PMID: 19797317.

971 51. La Fortezza M, Schenk M, Cosolo A, Kolybaba A, Grass I, Classen AK. JAK/STAT signalling  
972 mediates cell survival in response to tissue stress. *Development*. 2016;143(16):2907-19. Epub  
973 20160706. doi: 10.1242/dev.132340. PubMed PMID: 27385008.

974 52. Betz A, Ryoo HD, Steller H, Darnell JE, Jr. STAT92E is a positive regulator of Drosophila  
975 inhibitor of apoptosis 1 (DIAP1) and protects against radiation-induced apoptosis. *Proc Natl Acad Sci*  
976 U S A. 2008;105(37):13805-10. Epub 20080908. doi: 10.1073/pnas.0806291105. PubMed PMID:  
977 18779571; PubMed Central PMCID: PMC2544535.

978 53. Kaupilla S, Maaty WS, Chen P, Tomar RS, Eby MT, Chapo J, et al. Eiger and its receptor,  
979 Wengen, comprise a TNF-like system in Drosophila. *Oncogene*. 2003;22(31):4860-7. Epub  
980 2003/08/02. doi: 10.1038/sj.onc.1206715. PubMed PMID: 12894227.

981 54. Muzzopappa M, Murcia L, Milan M. Feedback amplification loop drives malignant growth in  
982 epithelial tissues. *Proc Natl Acad Sci U S A*. 2017;114(35):E7291-E300. Epub 20170814. doi:  
983 10.1073/pnas.1701791114. PubMed PMID: 28808034; PubMed Central PMCID: PMC5584413.

984 55. Khan SJ, Abidi SNF, Skinner A, Tian Y, Smith-Bolton RK. The Drosophila Duox maturation  
985 factor is a key component of a positive feedback loop that sustains regeneration signaling. *PLoS*  
986 *Genet*. 2017;13(7):e1006937. Epub 2017/07/29. doi: 10.1371/journal.pgen.1006937. PubMed PMID:  
987 28753614; PubMed Central PMCID: PMC5550008.

988 56. Pinal N, Martin M, Medina I, Morata G. Short-term activation of the Jun N-terminal kinase  
989 pathway in apoptosis-deficient cells of Drosophila induces tumorigenesis. *Nat Commun*.  
990 2018;9(1):1541. Epub 2018/04/20. doi: 10.1038/s41467-018-04000-6. PubMed PMID: 29670104;  
991 PubMed Central PMCID: PMC5906466.

992 57. Fox DT, Cohen E, Smith-Bolton R. Model systems for regeneration: *Drosophila*. *Development*.  
993 2020;147(7). Epub 20200406. doi: 10.1242/dev.173781. PubMed PMID: 32253254; PubMed Central  
994 PMCID: PMCPMC7157589.

995 58. Chatterjee N, Bohmann D. A versatile PhiC31 based reporter system for measuring AP-1 and  
996 Nrf2 signaling in *Drosophila* and in tissue culture. *PLoS One*. 2012;7(4):e34063. Epub 2012/04/18.  
997 doi: 10.1371/journal.pone.0034063. PubMed PMID: 22509270; PubMed Central PMCID:  
998 PMCPMC3324472.

999 59. Hariharan IK, Serras F. Imaginal disc regeneration takes flight. *Curr Opin Cell Biol*.  
1000 2017;48:10-6. Epub 20170401. doi: 10.1016/j.ceb.2017.03.005. PubMed PMID: 28376317; PubMed  
1001 Central PMCID: PMCPMC5591769.

1002 60. Trengove NJ, Stacey MC, MacAuley S, Bennett N, Gibson J, Burslem F, et al. Analysis of the  
1003 acute and chronic wound environments: the role of proteases and their inhibitors. *Wound Repair*  
1004 *Regen*. 1999;7(6):442-52. Epub 2000/01/13. doi: 10.1046/j.1524-475x.1999.00442.x. PubMed PMID:  
1005 10633003.

1006 61. Yager DR, Nwomeh BC. The proteolytic environment of chronic wounds. *Wound Repair*  
1007 *Regen*. 1999;7(6):433-41. Epub 2000/01/13. doi: 10.1046/j.1524-475x.1999.00433.x. PubMed PMID:  
1008 10633002.

1009 62. Caley MP, Martins VL, O'Toole EA. Metalloproteinases and Wound Healing. *Adv Wound Care*  
1010 (New Rochelle). 2015;4(4):225-34. Epub 2015/05/07. doi: 10.1089/wound.2014.0581. PubMed PMID:  
1011 25945285; PubMed Central PMCID: PMCPMC4397992.

1012 63. Moseley R, Hilton JR, Waddington RJ, Harding KG, Stephens P, Thomas DW. Comparison of  
1013 oxidative stress biomarker profiles between acute and chronic wound environments. *Wound Repair*  
1014 *Regen*. 2004;12(4):419-29. Epub 2004/07/21. doi: 10.1111/j.1067-1927.2004.12406.x. PubMed PMID:  
1015 15260807.

1016 64. Chipurupalli S, Samavedam U, Robinson N. Crosstalk Between ER Stress, Autophagy and  
1017 Inflammation. *Front Med (Lausanne)*. 2021;8:758311. Epub 20211105. doi:  
1018 10.3389/fmed.2021.758311. PubMed PMID: 34805224; PubMed Central PMCID: PMCPMC8602556.

1019 65. Wu C, Chen C, Dai J, Zhang F, Chen Y, Li W, et al. Toll pathway modulates TNF-induced  
1020 JNK-dependent cell death in *Drosophila*. *Open Biol*. 2015;5(7):140171. Epub 2015/07/24. doi:  
1021 10.1098/rsob.140171. PubMed PMID: 26202785; PubMed Central PMCID: PMCPMC4632500.

- 1022 66. Zielke N, Korzelius J, van Straaten M, Bender K, Schuhknecht GFP, Dutta D, et al. Fly-FUCCI:  
1023 A versatile tool for studying cell proliferation in complex tissues. *Cell Rep.* 2014;7(2):588-98. Epub  
1024 2014/04/15. doi: 10.1016/j.celrep.2014.03.020. PubMed PMID: 24726363.
- 1025 67. Wright VM, Vogt KL, Smythe E, Zeidler MP. Differential activities of the *Drosophila* JAK/STAT  
1026 pathway ligands Upd, Upd2 and Upd3. *Cell Signal.* 2011;23(5):920-7. Epub 20110122. doi:  
1027 10.1016/j.cellsig.2011.01.020. PubMed PMID: 21262354.
- 1028 68. Osman D, Buchon N, Chakrabarti S, Huang YT, Su WC, Poidevin M, et al. Autocrine and  
1029 paracrine unpaired signaling regulate intestinal stem cell maintenance and division. *J Cell Sci.*  
1030 2012;125(Pt 24):5944-9. Epub 20121004. doi: 10.1242/jcs.113100. PubMed PMID: 23038775.
- 1031 69. Jiang H, Grenley MO, Bravo MJ, Blumhagen RZ, Edgar BA. EGFR/Ras/MAPK signaling  
1032 mediates adult midgut epithelial homeostasis and regeneration in *Drosophila*. *Cell Stem Cell.*  
1033 2011;8(1):84-95. Epub 20101216. doi: 10.1016/j.stem.2010.11.026. PubMed PMID: 21167805;  
1034 PubMed Central PMCID: PMC3021119.
- 1035 70. Bach EA, Ekas LA, Ayala-Camargo A, Flaherty MS, Lee H, Perrimon N, et al. GFP reporters  
1036 detect the activation of the *Drosophila* JAK/STAT pathway in vivo. *Gene Expr Patterns.* 2007;7(3):323-  
1037 31. Epub 20060822. doi: 10.1016/j.modgep.2006.08.003. PubMed PMID: 17008134.
- 1038 71. Rodrigues AB, Zoranovic T, Ayala-Camargo A, Grewal S, Reyes-Robles T, Krasny M, et al.  
1039 Activated STAT regulates growth and induces competitive interactions independently of Myc, Yorkie,  
1040 Wingless and ribosome biogenesis. *Development.* 2012;139(21):4051-61. Epub 20120919. doi:  
1041 10.1242/dev.076760. PubMed PMID: 22992954; PubMed Central PMCID: PMC3472591.
- 1042 72. Hatini V, Kula-Eversole E, Nusinow D, Del Signore SJ. Essential roles for stat92E in  
1043 expanding and patterning the proximodistal axis of the *Drosophila* wing imaginal disc. *Dev Biol.*  
1044 2013;378(1):38-50. Epub 20130307. doi: 10.1016/j.ydbio.2013.02.016. PubMed PMID: 23499656;  
1045 PubMed Central PMCID: PMC3776456.
- 1046 73. Recasens-Alvarez C, Ferreira A, Milan M. JAK/STAT controls organ size and fate specification  
1047 by regulating morphogen production and signalling. *Nat Commun.* 2017;8:13815. Epub 20170103. doi:  
1048 10.1038/ncomms13815. PubMed PMID: 28045022; PubMed Central PMCID: PMC5216089.
- 1049 74. Colombani J, Andersen DS, Leopold P. Secreted peptide Dilp8 coordinates *Drosophila* tissue  
1050 growth with developmental timing. *Science.* 2012;336(6081):582-5. doi: 10.1126/science.1216689.  
1051 PubMed PMID: 22556251.
- 1052 75. Hay BA, Wolff T, Rubin GM. Expression of baculovirus P35 prevents cell death in *Drosophila*.  
1053 *Development.* 1994;120(8):2121-9. Epub 1994/08/01. PubMed PMID: 7925015.



- 1054 76. Weber U, Paricio N, Mlodzik M. Jun mediates Frizzled-induced R3/R4 cell fate distinction and  
1055 planar polarity determination in the Drosophila eye. *Development*. 2000;127(16):3619-29. Epub  
1056 2000/07/21. doi: 10.1242/dev.127.16.3619. PubMed PMID: 10903185.
  
- 1057 77. Ayala-Camargo A, Anderson AM, Amoyel M, Rodrigues AB, Flaherty MS, Bach EA.  
1058 JAK/STAT signaling is required for hinge growth and patterning in the Drosophila wing disc. *Dev Biol*.  
1059 2013;382(2):413-26. Epub 20130823. doi: 10.1016/j.ydbio.2013.08.016. PubMed PMID: 23978534;  
1060 PubMed Central PMCID: PMC3795806.
  
- 1061 78. Stevens LJ, Page-McCaw A. A secreted MMP is required for reepithelialization during wound  
1062 healing. *Mol Biol Cell*. 2012;23(6):1068-79. Epub 20120119. doi: 10.1091/mbc.E11-09-0745. PubMed  
1063 PMID: 22262460; PubMed Central PMCID: PMC3302734.
  
- 1064 79. Cheong R, Rhee A, Wang CJ, Nemenman I, Levchenko A. Information transduction capacity  
1065 of noisy biochemical signaling networks. *Science*. 2011;334(6054):354-8. Epub 20110915. doi:  
1066 10.1126/science.1204553. PubMed PMID: 21921160; PubMed Central PMCID: PMC3895446.
  
- 1067 80. Balazsi G, van Oudenaarden A, Collins JJ. Cellular decision making and biological noise: from  
1068 microbes to mammals. *Cell*. 2011;144(6):910-25. Epub 2011/03/19. doi: 10.1016/j.cell.2011.01.030.  
1069 PubMed PMID: 21414483; PubMed Central PMCID: PMC3068611.
  
- 1070 81. Khan I, Ponnusamy S, Rahman SU, Giubellin A, Arany PR. Co-opting Developmental  
1071 Signaling Pathways to Promote Wound Healing. *Melvin A. Shiffman, Low M, editors: Springer, Cham*;  
1072 2018. pp 103-14 p.
  
- 1073 82. Ghilardi SJ, O'Reilly BM, Sgro AE. Intracellular signaling dynamics and their role in  
1074 coordinating tissue repair. *Wiley Interdiscip Rev Syst Biol Med*. 2020;12(3):e1479. Epub 20200208.  
1075 doi: 10.1002/wsbm.1479. PubMed PMID: 32035001; PubMed Central PMCID: PMC7187325.
  
- 1076 83. Jordan JD, Landau EM, Iyengar R. Signaling networks: the origins of cellular multitasking.  
1077 *Cell*. 2000;103(2):193-200. Epub 2000/11/01. doi: 10.1016/s0092-8674(00)00112-4. PubMed PMID:  
1078 11057893; PubMed Central PMCID: PMC3619409.
  
- 1079 84. Milo R, Shen-Orr S, Itzkovitz S, Kashtan N, Chklovskii D, Alon U. Network motifs: simple  
1080 building blocks of complex networks. *Science*. 2002;298(5594):824-7. Epub 2002/10/26. doi:  
1081 10.1126/science.298.5594.824. PubMed PMID: 12399590.
  
- 1082 85. Levine M, Davidson EH. Gene regulatory networks for development. *Proc Natl Acad Sci U S*  
1083 *A*. 2005;102(14):4936-42. Epub 20050323. doi: 10.1073/pnas.0408031102. PubMed PMID:  
1084 15788537; PubMed Central PMCID: PMC555974.

- 1085 86. Azeloglu EU, Iyengar R. Signaling networks: information flow, computation, and decision  
1086 making. Cold Spring Harb Perspect Biol. 2015;7(4):a005934. Epub 2015/04/03. doi:  
1087 10.1101/cshperspect.a005934. PubMed PMID: 25833842; PubMed Central PMCID:  
1088 PMCPMC4382748.
- 1089 87. Tyson JJ, Chen KC, Novak B. Sniffers, buzzers, toggles and blinkers: dynamics of regulatory  
1090 and signaling pathways in the cell. Curr Opin Cell Biol. 2003;15(2):221-31. Epub 2003/03/22. doi:  
1091 10.1016/s0955-0674(03)00017-6. PubMed PMID: 12648679.
- 1092 88. Eungdamrong NJ, Iyengar R. Modeling cell signaling networks. Biol Cell. 2004;96(5):355-62.  
1093 Epub 2004/06/23. doi: 10.1016/j.biolcel.2004.03.004. PubMed PMID: 15207904; PubMed Central  
1094 PMCID: PMCPMC3620715.
- 1095 89. Umulis DM, Othmer HG. The role of mathematical models in understanding pattern formation  
1096 in developmental biology. Bull Math Biol. 2015;77(5):817-45. doi: 10.1007/s11538-014-0019-7.  
1097 PubMed PMID: 25280665; PubMed Central PMCID: PMCPMC4819020.
- 1098 90. Capek D, Muller P. Positional information and tissue scaling during development and  
1099 regeneration. Development. 2019;146(24). Epub 2019/12/22. doi: 10.1242/dev.177709. PubMed  
1100 PMID: 31862792.
- 1101 91. Kondo S, Miura T. Reaction-diffusion model as a framework for understanding biological  
1102 pattern formation. Science. 2010;329(5999):1616-20. Epub 2010/10/12. doi:  
1103 10.1126/science.1179047. PubMed PMID: 20929839.
- 1104 92. Khan SJ, Abidi SNF, Skinner A, Tian Y, Smith-Bolton RK. A positive feedback loop ensures  
1105 propagation of ROS production and JNK signalling throughout Drosophila tissue regeneration. 2017.  
1106 doi: 10.1101/152140.
- 1107 93. Shlevkov E, Morata G. A dp53/JNK-dependant feedback amplification loop is essential for the  
1108 apoptotic response to stress in Drosophila. Cell Death Differ. 2012;19(3):451-60. Epub 2011/09/03.  
1109 doi: 10.1038/cdd.2011.113. PubMed PMID: 21886179; PubMed Central PMCID: PMCPMC3278728.
- 1110 94. Martin-Blanco E, Gampel A, Ring J, Virdee K, Kirov N, Tolkovsky AM, et al. puckered encodes  
1111 a phosphatase that mediates a feedback loop regulating JNK activity during dorsal closure in  
1112 Drosophila. Genes Dev. 1998;12(4):557-70. doi: 10.1101/gad.12.4.557. PubMed PMID: 9472024;  
1113 PubMed Central PMCID: PMCPMC316530.
- 1114 95. Karsten P, Hader S, Zeidler MP. Cloning and expression of Drosophila SOCS36E and its  
1115 potential regulation by the JAK/STAT pathway. Mech Dev. 2002;117(1-2):343-6. doi: 10.1016/s0925-  
1116 4773(02)00216-2. PubMed PMID: 12204282.

- 1117 96. Callus BA, Mathey-Prevot B. SOCS36E, a novel Drosophila SOCS protein, suppresses  
1118 JAK/STAT and EGF-R signalling in the imaginal wing disc. *Oncogene*. 2002;21(31):4812-21. doi:  
1119 10.1038/sj.onc.1205618. PubMed PMID: 12101419.
- 1120 97. Madar D, Dekel E, Bren A, Alon U. Negative auto-regulation increases the input dynamic-  
1121 range of the arabinose system of Escherichia coli. *BMC Syst Biol*. 2011;5:111. Epub 20110712. doi:  
1122 10.1186/1752-0509-5-111. PubMed PMID: 21749723; PubMed Central PMCID: PMCPMC3163201.
- 1123 98. Li C, Zhang L, Nie Q. Landscape reveals critical network structures for sharpening gene  
1124 expression boundaries. *BMC Syst Biol*. 2018;12(1):67. Epub 20180613. doi: 10.1186/s12918-018-  
1125 0595-5. PubMed PMID: 29898720; PubMed Central PMCID: PMCPMC6001026.
- 1126 99. Jiang J, Struhl G. Complementary and mutually exclusive activities of decapentaplegic and  
1127 wingless organize axial patterning during Drosophila leg development. *Cell*. 1996;86(3):401-9. Epub  
1128 1996/08/09. doi: 10.1016/s0092-8674(00)80113-0. PubMed PMID: 8756722.
- 1129 100. Brook WJ, Cohen SM. Antagonistic interactions between wingless and decapentaplegic  
1130 responsible for dorsal-ventral pattern in the Drosophila Leg. *Science*. 1996;273(5280):1373-7. Epub  
1131 1996/09/06. doi: 10.1126/science.273.5280.1373. PubMed PMID: 8703069.
- 1132 101. Lee J, Lee J, Farquhar KS, Yun J, Frankenberger CA, Bevilacqua E, et al. Network of mutually  
1133 repressive metastasis regulators can promote cell heterogeneity and metastatic transitions. *Proc Natl*  
1134 *Acad Sci U S A*. 2014;111(3):E364-73. Epub 20140106. doi: 10.1073/pnas.1304840111. PubMed  
1135 PMID: 24395801; PubMed Central PMCID: PMCPMC3903259.
- 1136 102. Sokolowski TR, Erdmann T, ten Wolde PR. Mutual repression enhances the steepness and  
1137 precision of gene expression boundaries. *PLoS Comput Biol*. 2012;8(8):e1002654. Epub 20120830.  
1138 doi: 10.1371/journal.pcbi.1002654. PubMed PMID: 22956897; PubMed Central PMCID:  
1139 PMCPMC3431325.
- 1140 103. Theisen H, Haerry TE, O'Connor MB, Marsh JL. Developmental territories created by mutual  
1141 antagonism between Wingless and Decapentaplegic. *Development*. 1996;122(12):3939-48. Epub  
1142 1996/12/01. PubMed PMID: 9012514.
- 1143 104. Villa-Cuesta E, Modolell J. Mutual repression between msh and Iro-C is an essential  
1144 component of the boundary between body wall and wing in Drosophila. *Development*.  
1145 2005;132(18):4087-96. Epub 20050810. doi: 10.1242/dev.01977. PubMed PMID: 16093324.
- 1146 105. Zagorski M, Tabata Y, Brandenberg N, Lutolf MP, Tkacik G, Bollenbach T, et al. Decoding of  
1147 position in the developing neural tube from antiparallel morphogen gradients. *Science*.

1148 2017;356(6345):1379-83. Epub 2017/07/01. doi: 10.1126/science.aam5887. PubMed PMID:  
1149 28663499; PubMed Central PMCID: PMCPMC5568706.

1150 106. Ferrell JE, Jr. Self-perpetuating states in signal transduction: positive feedback, double-  
1151 negative feedback and bistability. *Curr Opin Cell Biol.* 2002;14(2):140-8. Epub 2002/03/14. doi:  
1152 10.1016/s0955-0674(02)00314-9. PubMed PMID: 11891111.

1153 107. JAK/STAT Pathway Signalling in *Drosophila Melanogaster* [Internet]. Landes Bioscience.

1154 108. Sarov M, Barz C, Jambor H, Hein MY, Schmied C, Suchold D, et al. A genome-wide resource  
1155 for the analysis of protein localisation in *Drosophila*. *Elife.* 2016;5:e12068. Epub 2016/02/21. doi:  
1156 10.7554/eLife.12068. PubMed PMID: 26896675; PubMed Central PMCID: PMCPMC4805545.

1157 109. Niu GJ, Xu JD, Yuan WJ, Sun JJ, Yang MC, He ZH, et al. Protein Inhibitor of Activated STAT  
1158 (PIAS) Negatively Regulates the JAK/STAT Pathway by Inhibiting STAT Phosphorylation and  
1159 Translocation. *Front Immunol.* 2018;9:2392. Epub 20181026. doi: 10.3389/fimmu.2018.02392.  
1160 PubMed PMID: 30416501; PubMed Central PMCID: PMCPMC6212522.

1161 110. Saadin A, Starz-Gaiano M. Identification of Novel Regulators of the JAK/STAT Signaling  
1162 Pathway that Control Border Cell Migration in the *Drosophila* Ovary. *G3 (Bethesda).* 2016;6(7):1991-  
1163 2002. Epub 2016/05/14. doi: 10.1534/g3.116.028100. PubMed PMID: 27175018; PubMed Central  
1164 PMCID: PMCPMC4938652.

1165 111. Arbouzova NI, Bach EA, Zeidler MP. Ken & barbie selectively regulates the expression of a  
1166 subset of Jak/STAT pathway target genes. *Curr Biol.* 2006;16(1):80-8. doi: 10.1016/j.cub.2005.11.033.  
1167 PubMed PMID: 16401426.

1168 112. Harris RE, Stinchfield MJ, Nystrom SL, McKay DJ, Hariharan IK. Damage-responsive,  
1169 maturity-silenced enhancers regulate multiple genes that direct regeneration in *Drosophila*. *Elife.*  
1170 2020;9. Epub 20200603. doi: 10.7554/eLife.58305. PubMed PMID: 32490812; PubMed Central  
1171 PMCID: PMCPMC7299344.

1172 113. Muller P, Kutenkeuler D, Gesellchen V, Zeidler MP, Boutros M. Identification of JAK/STAT  
1173 signalling components by genome-wide RNA interference. *Nature.* 2005;436(7052):871-5. Epub  
1174 2005/08/12. doi: 10.1038/nature03869. PubMed PMID: 16094372.

1175 114. Baeg GH, Zhou R, Perrimon N. Genome-wide RNAi analysis of JAK/STAT signaling  
1176 components in *Drosophila*. *Genes Dev.* 2005;19(16):1861-70. Epub 20050729. doi:  
1177 10.1101/gad.1320705. PubMed PMID: 16055650; PubMed Central PMCID: PMCPMC1186186.

1178 115. La Marca JE, Willoughby LF, Allan K, Portela M, Goh PK, Tiganis T, et al. PTP61F Mediates  
1179 Cell Competition and Mitigates Tumorigenesis. *Int J Mol Sci.* 2021;22(23). Epub 20211125. doi:  
1180 10.3390/ijms222312732. PubMed PMID: 34884538; PubMed Central PMCID: PMC8657627.

1181 116. Willoughby LF, Manent J, Allan K, Lee H, Portela M, Wiede F, et al. Differential regulation of  
1182 protein tyrosine kinase signalling by Dock and the PTP61F variants. *FEBS J.* 2017;284(14):2231-50.  
1183 Epub 20170630. doi: 10.1111/febs.14118. PubMed PMID: 28544778.

1184 117. Schertel C, Huang D, Bjorklund M, Bischof J, Yin D, Li R, et al. Systematic screening of a  
1185 Drosophila ORF library in vivo uncovers Wnt/Wg pathway components. *Dev Cell.* 2013;25(2):207-19.  
1186 Epub 2013/04/16. doi: 10.1016/j.devcel.2013.02.019. PubMed PMID: 23583758.

1187 118. Meinhardt H. Cell determination boundaries as organizing regions for secondary embryonic  
1188 fields. *Dev Biol.* 1983;96(2):375-85. doi: 10.1016/0012-1606(83)90175-6. PubMed PMID: 6832478.

1189 119. Martinez Arias A, Steventon B. On the nature and function of organizers. *Development.*  
1190 2018;145(5). Epub 20180309. doi: 10.1242/dev.159525. PubMed PMID: 29523654; PubMed Central  
1191 PMCID: PMC5868996.

1192 120. Bilder D, Li M, Perrimon N. Cooperative regulation of cell polarity and growth by Drosophila  
1193 tumor suppressors. *Science.* 2000;289(5476):113-6. Epub 2000/07/07. doi:  
1194 10.1126/science.289.5476.113. PubMed PMID: 10884224.

1195 121. Pagliarini RA, Xu T. A genetic screen in Drosophila for metastatic behavior. *Science.*  
1196 2003;302(5648):1227-31. Epub 2003/10/11. doi: 10.1126/science.1088474. PubMed PMID:  
1197 14551319.

1198 122. Dillard C, Reis JGT, Rusten TE. Ras(V12); scrib(-/-) Tumors: A Cooperative Oncogenesis  
1199 Model Fueled by Tumor/Host Interactions. *Int J Mol Sci.* 2021;22(16). Epub 20210818. doi:  
1200 10.3390/ijms22168873. PubMed PMID: 34445578; PubMed Central PMCID: PMC8396170.

1201 123. Igaki T, Pastor-Pareja JC, Aonuma H, Miura M, Xu T. Intrinsic tumor suppression and  
1202 epithelial maintenance by endocytic activation of Eiger/TNF signaling in Drosophila. *Dev Cell.*  
1203 2009;16(3):458-65. Epub 2009/03/18. doi: 10.1016/j.devcel.2009.01.002. PubMed PMID: 19289090;  
1204 PubMed Central PMCID: PMC2729686.

1205 124. Ohsawa S, Sugimura K, Takino K, Xu T, Miyawaki A, Igaki T. Elimination of oncogenic  
1206 neighbors by JNK-mediated engulfment in Drosophila. *Dev Cell.* 2011;20(3):315-28. Epub 2011/03/15.  
1207 doi: 10.1016/j.devcel.2011.02.007. PubMed PMID: 21397843.

- 1208 125. Uhlirova M, Jasper H, Bohmann D. Non-cell-autonomous induction of tissue overgrowth by  
1209 JNK/Ras cooperation in a *Drosophila* tumor model. *Proc Natl Acad Sci U S A*. 2005;102(37):13123-8.  
1210 Epub 2005/09/10. doi: 10.1073/pnas.0504170102. PubMed PMID: 16150723; PubMed Central  
1211 PMCID: PMCPMC1201591.
- 1212 126. Amoyel M, Anderson AM, Bach EA. JAK/STAT pathway dysregulation in tumors: a *Drosophila*  
1213 perspective. *Semin Cell Dev Biol*. 2014;28:96-103. Epub 20140328. doi:  
1214 10.1016/j.semcdb.2014.03.023. PubMed PMID: 24685611; PubMed Central PMCID:  
1215 PMCPMC4037387.
- 1216 127. Dhanasekaran DN, Reddy EP. JNK-signaling: A multiplexing hub in programmed cell death.  
1217 *Genes Cancer*. 2017;8(9-10):682-94. Epub 2017/12/14. doi: 10.18632/genesandcancer.155. PubMed  
1218 PMID: 29234486; PubMed Central PMCID: PMCPMC5724802.
- 1219 128. Trivedi S, Starz-Gaiano M. *Drosophila* Jak/STAT Signaling: Regulation and Relevance in  
1220 Human Cancer and Metastasis. *Int J Mol Sci*. 2018;19(12). Epub 20181214. doi:  
1221 10.3390/ijms19124056. PubMed PMID: 30558204; PubMed Central PMCID: PMCPMC6320922.
- 1222 129. Herrera SC, Bach EA. JAK/STAT signaling in stem cells and regeneration: from *Drosophila* to  
1223 vertebrates. *Development*. 2019;146(2). Epub 20190129. doi: 10.1242/dev.167643. PubMed PMID:  
1224 30696713; PubMed Central PMCID: PMCPMC6361132.
- 1225 130. Tsai YC, Sun YH. Long-range effect of upd, a ligand for Jak/STAT pathway, on cell cycle in  
1226 *Drosophila* eye development. *Genesis*. 2004;39(2):141-53. Epub 2004/06/02. doi:  
1227 10.1002/gene.20035. PubMed PMID: 15170700.
- 1228 131. Du L, Wang J. JAK/STAT pathway promotes *Drosophila* neuroblast proliferation via the direct  
1229 *CycE* regulation. *bioRxiv*. 2020:2020.07.10.195875. doi: 10.1101/2020.07.10.195875.
- 1230 132. Beira JV, Torres J, Paro R. Signalling crosstalk during early tumorigenesis in the absence of  
1231 Polycomb silencing. *PLoS Genet*. 2018;14(1):e1007187. Epub 2018/01/23. doi:  
1232 10.1371/journal.pgen.1007187. PubMed PMID: 29357360; PubMed Central PMCID:  
1233 PMCPMC5794193.
- 1234 133. Wang Z, Shi C. Cellular senescence is a promising target for chronic wounds: a  
1235 comprehensive review. *Burns Trauma*. 2020;8:tkaa021. Epub 20200623. doi: 10.1093/burnst/tkaa021.  
1236 PubMed PMID: 32607375; PubMed Central PMCID: PMCPMC7309580.
- 1237 134. Schindelin J, Arganda-Carreras I, Frise E, Kaynig V, Longair M, Pietzsch T, et al. Fiji: an open-  
1238 source platform for biological-image analysis. *Nat Methods*. 2012;9(7):676-82. doi:  
1239 10.1038/nmeth.2019. PubMed PMID: 22743772; PubMed Central PMCID: PMC3855844.



1240 135. Rausenberger J, Tscheuschler A, Nordmeier W, Wust F, Timmer J, Schafer E, et al.  
 1241 Photoconversion and nuclear trafficking cycles determine phytochrome A's response profile to far-red  
 1242 light. Cell. 2011;146(5):813-25. Epub 2011/09/03. doi: 10.1016/j.cell.2011.07.023. PubMed PMID:  
 1243 21884939.

1244

1245

# Figure 1

## JNK/AP-1 and JAK/STAT are activated in distinct spatial domains upon tissue damage

**(A-B)** A control wing disc **(A)** and wing disc after 24h of *egr*-expression **(B)** in the pouch (R0) (see also **S1.1, B**) under the control of the inducible *m-GAL4* (*rotund-GAL4*) driver (*mt<sup>ts</sup>>*) in the pouch domain. Discs express the JNK/AP-1 reporter *TRE>RFP* and were stained for cleaved Dcp-1 to visualize apoptosis.

**(C-D)** A control wing disc **(C)** and wing disc after 24h of *egr*-expression **(D)** in the pouch (R0), under the control of the inducible *m-GAL4* (*rotund-GAL4*) driver (*mt<sup>ts</sup>>*). Discs also express the FUCCI cell cycle reporters *mRFP-NLS-CycB<sup>1-266</sup>* (red) and *GFP-E2f1<sup>1-230</sup>* (green) (see also **S1.1A**) and were assessed for DNA replication by EdU incorporation assay.

**(E-F)** A control **(E)** and *egr*-expressing disc **(F)** at R0, expressing the *upd3.1-3-LacZ* (gray) and the JNK/AP-1 reporter *TRE>RFP* (magenta). Discs were stained for  $\beta$ -Galactosidase.

**(G-H)** A control **(G)** and *egr*-expressing disc **(F)** at R0, expressing the JNK/AP-1 reporter *TRE>RFP* (magenta) and the dynamic JAK/STAT reporter *Stat92E>dGFP* (green).

**(I-J)** 2D density plots mapping pixel fluorescence intensity values for the *TRE>RFP* (JNK intensity, X-axis) and *Stat92E>dGFP* (JAK/STAT intensity, Y-axis) reporters, measured in the combined wing pouch and hinge domains (black dashed lines in **O**) in control, *m-GAL4*-expressing discs **(I)** or *egr*-expressing discs **(J)**. Dashed lines (cyan) represent visually defined thresholds distinguishing low or high reporter activity in the quadrants Q1, Q2, Q3 and Q4. Note that less than 1% of pixels show both high JNK and high JAK/STAT signaling activity in the combined JNK and JAK/STAT signaling domains (i.e. pouch and hinge). Graphs represent pooled values from *n*=4, control and *n*=3, *egr*-expressing discs.

**(K-L)** A control **(K)** and *egr*-expressing disc **(L)** assessed for S-phase activity using EdU incorporation assays. Discs also express the *TRE>RFP* (magenta) and *Stat92E>dGFP* (green) reporters.

**(M-N)** Fluorescence intensity profiles for *upd3.1-3LacZ* (gray) and *TRE>RFP* (magenta) reporters **(M)**, or *TRE>RFP* (magenta), *Stat92E>dGFP* (green) reporters and EdU (yellow) reporter intensities **(N)** traced from the pouch center (PC) to the disc periphery (DP) (yellow arrows in **F** and **O**). Graph represents mean  $\pm$  SEM of reporter fluorescence intensity values from *n*=15 tracks across a representative disc, scaled to the maximum measured value.

**(O)** Schematic representation of undamaged control discs and spatially segregated patterns of JNK/AP-1 (magenta) and JAK/STAT (green) reporter activity in 24h *egr*-expressing discs (R0).

Maximum projections of multiple confocal sections are shown in **K-L**.

Discs were stained with DAPI to visualize nuclei. Scale bars: 50  $\mu$ m

## Figure 2

### JNK/AP-1 signaling represses JAK/STAT activity cell-autonomously

**(A-C)** RFP expression marks *p35*-expressing control clones in the pouch (magenta, **A**) or *p35,hep<sup>act</sup>*-expressing JNK+ clones in the pouch (magenta, **B**) and peripodium (magenta, **C**) 28h after clone induction in discs expressing the stable *Stat92E>GFP* reporter (green). Yellow arrowheads indicate clones of interest. Note the cell-autonomous repression of *Stat92E>GFP* reporter activity in JNK+ clones in the pouch periphery and hinge (**B**), as well as in the peripodium (**C**), when compared to control clones in the pouch (**A**) and peripodium (see **S2A**)

**(D)** *p35,hep<sup>act</sup>*-expressing JNK+ clones in a disc expressing the *Stat92E>GFP* reporter (green), stained with anti-MMP-1 (magenta) - a downstream target of the JNK/AP-1 signaling pathway. The yellow circle highlights a JNK+ clone of interest, which shows a strong cell-autonomous repression of the JAK/STAT reporter activity in the JAK/STAT-signaling competent hinge, 48h after clone induction.

**(E-F)** Control disc (**E**) and a disc expressing *egr* (**F**) in the posterior compartment using the *enGAL4* driver at R0. Dashed yellow line marks the A/P boundary. Both discs express the *Stat92E>dGFP* reporter (green) and are stained for the JNK/AP-1 target MMP-1 (magenta). White asterisk indicates JNK/AP-1 reporter activity in the posterior pouch region. Note the non-cell autonomous JAK/STAT reporter activity in the anterior pouch, indicated by yellow arrowheads in **F**.

**(G-J)** Control (**G,I**) and *egr*-expressing (**H,J**) discs at 7h or 14h after ablation expressing the *TRE>RFP* reporter (magenta) and assessed for S-phase activity using EdU incorporation assay (cyan). While the number of S-phase cells are uniformly distributed in the pouch domain of undamaged control discs (**G,I**), note the successive decrease in the S-phase cells (cyan) from 7h (**H**) to 14h (**J**) of *egr*-expression, coinciding with increasing *TRE>RFP* reporter activity in the pouch. Insets show the same images, with settings adjusted to visualize the JNK/AP-1 activity in the pouch of 7h *egr*-expressing discs.

**(K-M)** A time-course analysis of *TRE>RFP* (magenta) and *Stat92E>dGFP* (green) reporter activity in *egr*-expressing discs after 7h (**K**), 14h (**L**) and 24h (**M**) of ablation. Yellow squares show magnified regions. Yellow lines mark the interface between JNK/AP-1 and JAK/STAT signaling cells. Note the increasing dominance of JNK/AP-1 signaling and decreasing JAK/STAT activation inside the boundary of JNK/AP-1 signaling cells at the JNK/AP-1-JAK/STAT interface.

**(N-P)** Representative 2D density plots of pixel fluorescence intensity for the *TRE>RFP* (JNK intensity, X-axis) and *Stat92E>dGFP* (JAK/STAT intensity, Y-axis) reporters, measured exclusively within the JNK/AP-1 signaling pouch domain (magenta in Fig. **1O**) from 7h (**L**), 14h (**M**) and 24h (**N**) *egr*-expressing discs. Black asterisks highlight the region of increase and subsequent decline in the density of co-localizing pixels with medium and high reporter activities from 7h to 14h (**N,O**), and 14h to 24h (**O,P**) respectively.

Maximum projections of multiple confocal sections are shown in **E-J**.

Discs were stained with DAPI to visualize nuclei. Scale bars: 50  $\mu$ m

### Figure 3

#### A mutual-repression loop promotes bistable segregation of JNK/AP-1 and JAK/STAT activation patterns

---

**(A-E')** Workflow to investigate the presence of a regulatory motif between the JNK/AP-1 and JAK/STAT signaling pathways driving pattern formation in *egr*-expressing discs. Fluorescence intensity profiles for the *TRE>RFP* (magenta) and *Stat92E>dGFP* (green) reporter patterns show bistable segregation in 24h *egr*-expressing discs. Intensity profiles are traced from the pouch center (PC) to the disc periphery (DP) **(A)**. Schematic showing the models tested – a uni-directional repression model acting only on JNK/AP-1 signaling **(B)** and a mutual repression model acting on both JNK/AP-1 and JAK/STAT signaling **(B')**. Modeling equations were generated, and a global analysis by sampling approach was used to analyze 21 selected parameters **(C)** (see also Fig.S3) and test for outcomes that produce bistable, switch-like patterns **(D-D')**. Number of simple bistable outcomes **(D)** from the mutual repression model (dark grey) are substantially greater than those from the uni-directional repression model (light grey) **(E)**. Applying stringent selection criteria based on the biologically observed reporter activity pattern **(D')**, positive outcomes reduce to 0 in the model without the mutual repression **(E')**.

# **Figure 4**

## **Ptp61F represses JAK/STAT activity in JNK/AP-1 signaling cells**

**(A-C)** A *ptp61F-RNAi*-expressing **(A)**, *egr*-expressing **(B)** and *egr,ptp61F-RNAi*-co-expressing disc **(C)** at R0. All discs also express the *Stat92E>dGFP* reporter (green). Yellow circles highlight the central domain of remaining *m-GAL4* expressing cells. Note the derepression and ectopic JAK/STAT activity in the *egr,ptp61F-RNAi*-co-expressing disc.

**(D)** Quantification of total area of wing discs. Graphs display mean  $\pm$  SEM for  $n=8$ , *egr*-expressing and  $n=10$ , *egr,ptp61F-RNAi*-co-expressing discs. T-tests were performed to test for statistical significance.

**(E)** Quantification of the *Stat92E>dGFP* reporter fluorescence intensity measured within the JNK/AP-1 signaling pouch domain. Black square in schematic shows measured region. Graphs display mean  $\pm$  SEM for  $n=8$ , *egr*-expressing and  $n=10$ , *egr,ptp61F-RNAi*-co-expressing discs. U-tests were performed to test for statistical significance.

**(F-I)** A control **(F)**, *stat92E*-expressing **(G)**, *egr*-expressing **(H)** and *egr,stat92E*-co-expressing disc **(I)**. All discs also express the dynamic *Stat92E>dGFP* reporter (green). Staining for HA confirms expression and nuclear/cytoplasmic localization of the *UAS-stat92E-3xHA* construct. Yellow arrowheads point to the restricted, non-autonomously induced JAK/STAT activity in the peripheral pouch in control discs **(F,G)**. Yellow circles highlight the central domain of remaining *m-GAL4* expressing cells **(H,I)**.

**(J)** Quantification of the *Stat92E>dGFP* reporter fluorescence intensity measured within the JNK/AP-1 signaling pouch domain. Black square in schematic **(E)** shows measured region. Graphs display mean  $\pm$  SEM for  $n=16$ , control discs (*mt<sup>ts</sup>>*),  $n=9$ , *stat92E*-expressing discs,  $n=11$ , *egr*-expressing and  $n=12$ , *egr,stat92E*-co-expressing discs. One-way ANOVA with multiple comparisons was performed to test for statistical significance.

Discs were stained with DAPI (magenta) to visualize nuclei. Scale bars: 50  $\mu$ m

# **Figure 5**

## **JAK/STAT repression by JNK/AP-1 is required for the G2 arrest and protects central wound cells from apoptosis.**

**(A-B)** An *egr*-expressing **(A)** and *egr,stat92E*-coexpressing disc **(B)** at R0, stained for DAPI (cyan), and cleaved Dcp-1 (red) to visualize apoptosis.

**(C-D)** Quantification of total wing disc area **(C)** and normalized area occupied by cleaved Dcp-1 **(D)**. Graphs display mean  $\pm$  SEM for  $n=10$ , *egr*-expressing and  $n=9$ , *egr,stat92E*-co-expressing discs. T-tests were performed to test for statistical significance.

**(E-F)** An *egr*-expressing **(E)** and *egr,stat92E*-coexpressing disc **(F)** at R0, also expressing the FUCCI reporter. Dashed white squares highlight the distinct shift from G2 (yellow cells) to G1 (green cells) in the pouch domain.

**(G-H)** Bar graph **(G)** representing the cumulative proportion of gap phase cells in G1 (green) and G2 (yellow) for each genotype. Graph **(H)** displays G1-phase:G2-phase ratios obtained from  $n=5$ , *egr*-expressing and  $n=3$ , *egr,stat92E*-co-expressing discs. Dashed white squares in **E-F** show measured regions. T-test with Welch's correction was performed to test for statistical significance.

**(I-J)** EdU incorporation assay to detect S-phase cells (gray) in *egr*-expressing **(I)**, or *egr,stat92E*-co-expressing **(J)** disc. Discs were stained with DAPI (red) to visualize nuclei.

**(K-L)** An *egr*-expressing **(K)** and *egr,ptp61F-RNAi*-coexpressing **(L)** disc at R0, stained for DAPI (cyan), and cleaved Dcp-1 (red) to visualize apoptosis.

**(M-N)** Quantification of total wing disc area **(M)** and normalized area occupied by cleaved Dcp-1 **(N)**. Graphs display mean  $\pm$  SEM for  $n=11$ , *egr*-expressing and  $n=15$ , *egr,ptp61F-RNAi*-coexpressing discs. T-tests were performed to test for statistical significance.

**(O-P)** EdU incorporation assay to detect S-phase cells (gray) in an *egr*-expressing **(O)**, and *egr,ptp61F-RNAi*-coexpressing **(P)** disc. Discs were also stained with DAPI (red) to visualize nuclei.

Maximum projections of multiple confocal sections are shown in **A-B**, **I-L**, **O-P**. Scale bars: 50  $\mu$ m



## Figure 6

### The wound organizer network segregates JNK/AP-1 and JAK/STAT signaling to drive oncogenic growth

(A-D) A control wing disc (A) and wing discs expressing *Ras<sup>v12</sup>* (B), *scrib-RNAi* (C, C'), or *Ras<sup>v12</sup>,scrib-RNAi* (D,D') for 44 h D6 AED. Discs also express the JNK/AP-1 reporter *TRE>RFP* (magenta) and the JAK/STAT reporter *Stat92E>dGFP* (green). Yellow squares in mark area of magnification shown in (C',D').

(E) Schematic shows the *TRE>RFP*-positive (JNK<sup>+</sup>, magenta), *Stat92E>dGFP*-positive (STAT<sup>+</sup>, green) and JNK/AP-1 and JAK/STAT double positive regions (JNK<sup>+</sup>STAT<sup>+</sup>, gray) selected for measurements. Graph represents normalized area of measured regions based on the total signaling area. Note that only 15% of regions within the tumor express both the JNK/AP-1 and JAK/STAT signaling reporters. Graph represents mean ± SEM for *n*=6, *Ras<sup>v12</sup>,scrib-RNAi*-expressing discs. One-way paired ANOVA with Holm-Šidák's multiple comparison test was performed to test for statistical significance.

(F) Schematic shows *TRE>RFP*-positive (JNK<sup>+</sup>, magenta) and *TRE>RFP*-negative (JNK<sup>-</sup>, white) regions selected for measurements. Graph represents *Stat92E>dGFP* fluorescence intensity measured within selected JNK<sup>+</sup> and JNK<sup>-</sup> regions. Note the reduction in the reporter intensity from 71.91±4.32 to 36.66±1.74 within the JNK<sup>-</sup> vs. JNK<sup>+</sup> region. Graph represents mean ± SEM for *n*=6, *ras<sup>v12</sup>,scrib-RNAi*-expressing discs. Paired t-tests was performed to test for statistical significance.

(G-H) A wing disc expressing *scrib-RNAi* (G) and *Ras<sup>v12</sup>,scrib-RNAi* (H) at 44 h. Discs also express the *Stat92E>dGFP* reporter and were stained for phospho-Histone3 (ph3) to visualize cells in mitosis. Segmented masks of ph3 were generated for quantifications and an overlay of the *Stat92E>dGFP* reporter (green) and ph3 (white) is represented. Orange dashed lines mark the STAT<sup>+</sup> regions within the discs.

(I) Schematic shows *Stat92E>dGFP*-positive (STAT<sup>+</sup>, green) and *Stat92E>dGFP*-negative (STAT<sup>-</sup>, white) regions selected for measurements. Graph represents ph3 counts normalized to area in the STAT<sup>+</sup> and STAT<sup>-</sup> regions for *n*=5, *Ras<sup>v12</sup>,scrib-RNAi*-expressing discs.

Maximum projections of multiple confocal sections are shown in G-H

Discs were stained with DAPI to visualize nuclei. Scale bars: 50 μm

## Figure 7

### Mutual repression between JNK/AP-1 and JAK/STAT sets up wound organizer activity

---

**(A-B)** Transient (7h *egr*-expression), and chronic (24h *egr*-expression or 44h *Ras<sup>v12</sup>,scrib-RNAi*-expression) activation of JNK/AP-1 signaling stratifies JNK-activating tissue into distinct JNK/AP-1 and JAK/STAT signaling domains **(A)** and cell behaviors **(B)**.

**(C)** *egr*-expressing discs spatially stratify tissue repair behaviors via a mutual repression motif. JNK/AP-1 represses JAK/STAT signaling activity via Ptp61F, while JAK/STAT represses JNK/AP-1 activation via Zfh2. JNK signaling ensures G2 arrest and cell survival, while JAK/STAT signaling ensures proliferation and supports survival in the absence of JNK.

**(D)** Disruption of the mutual repression motif by cell-autonomous activation of JNK/AP-1 and JAK/STAT signaling overrides the protective G2 stall and drives cells into mitotic cycling and G1, where p53 activation can lead to apoptotic outcomes.



Figure 1.

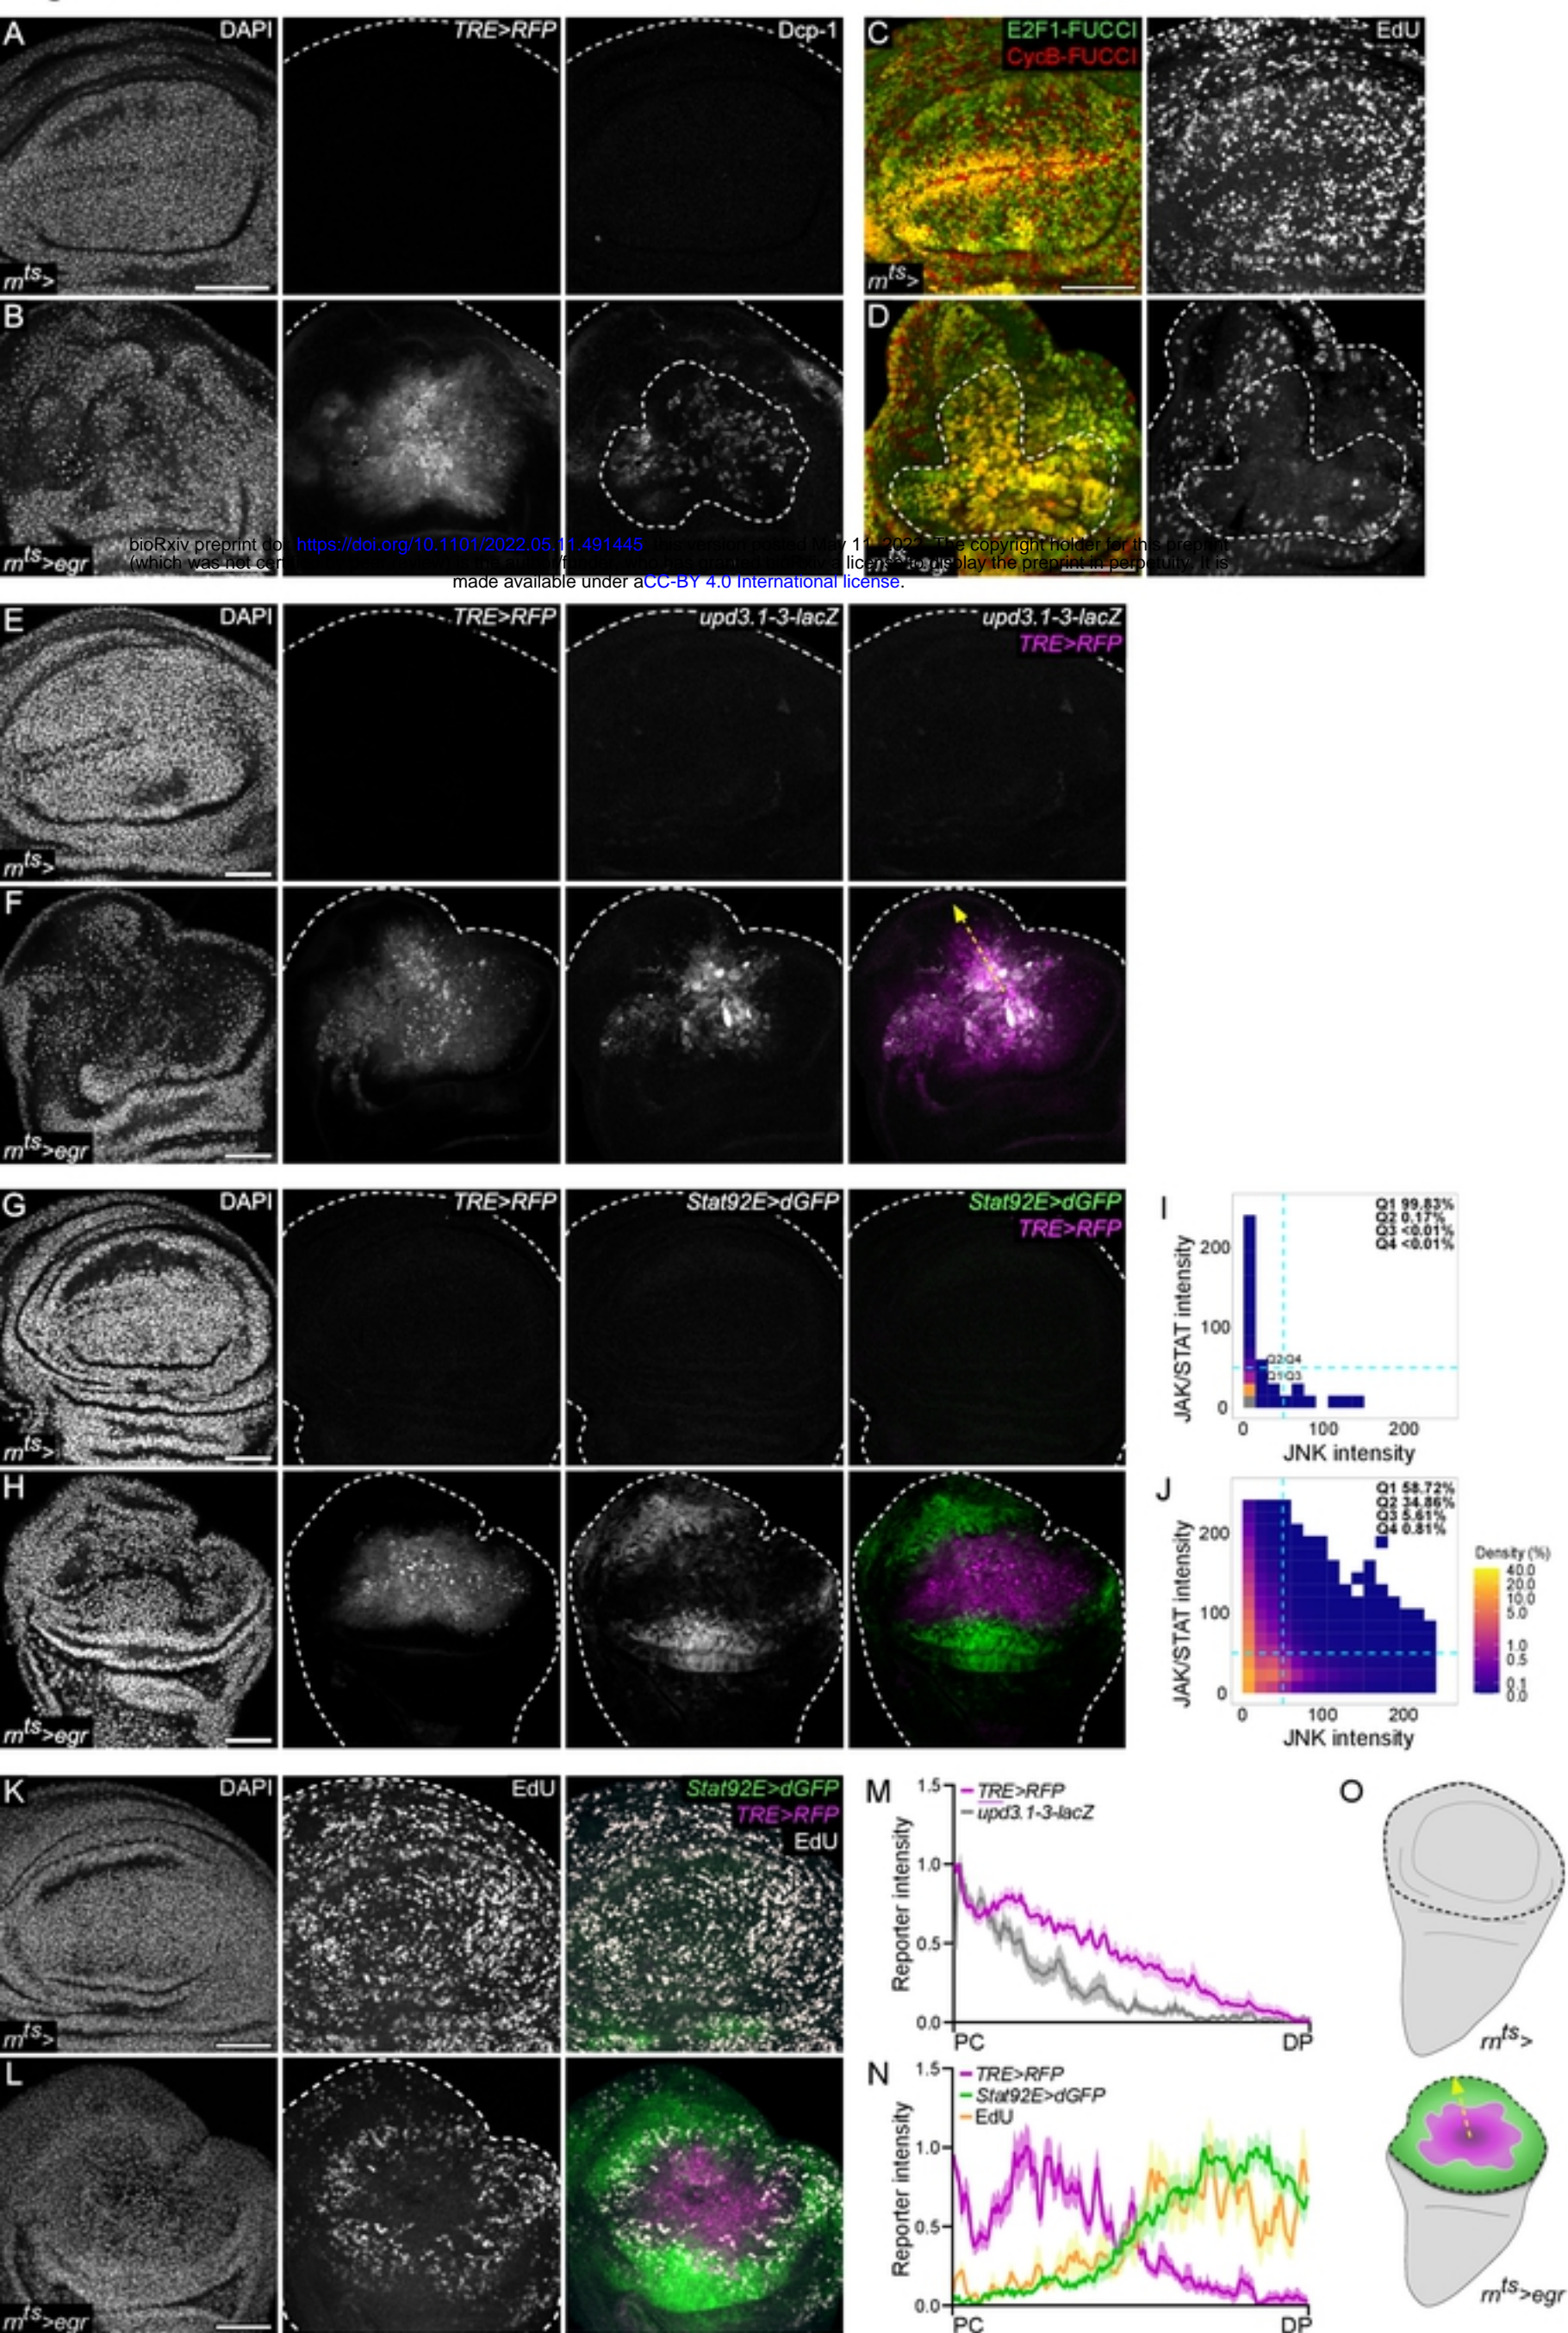

Figure 1



Figure 2

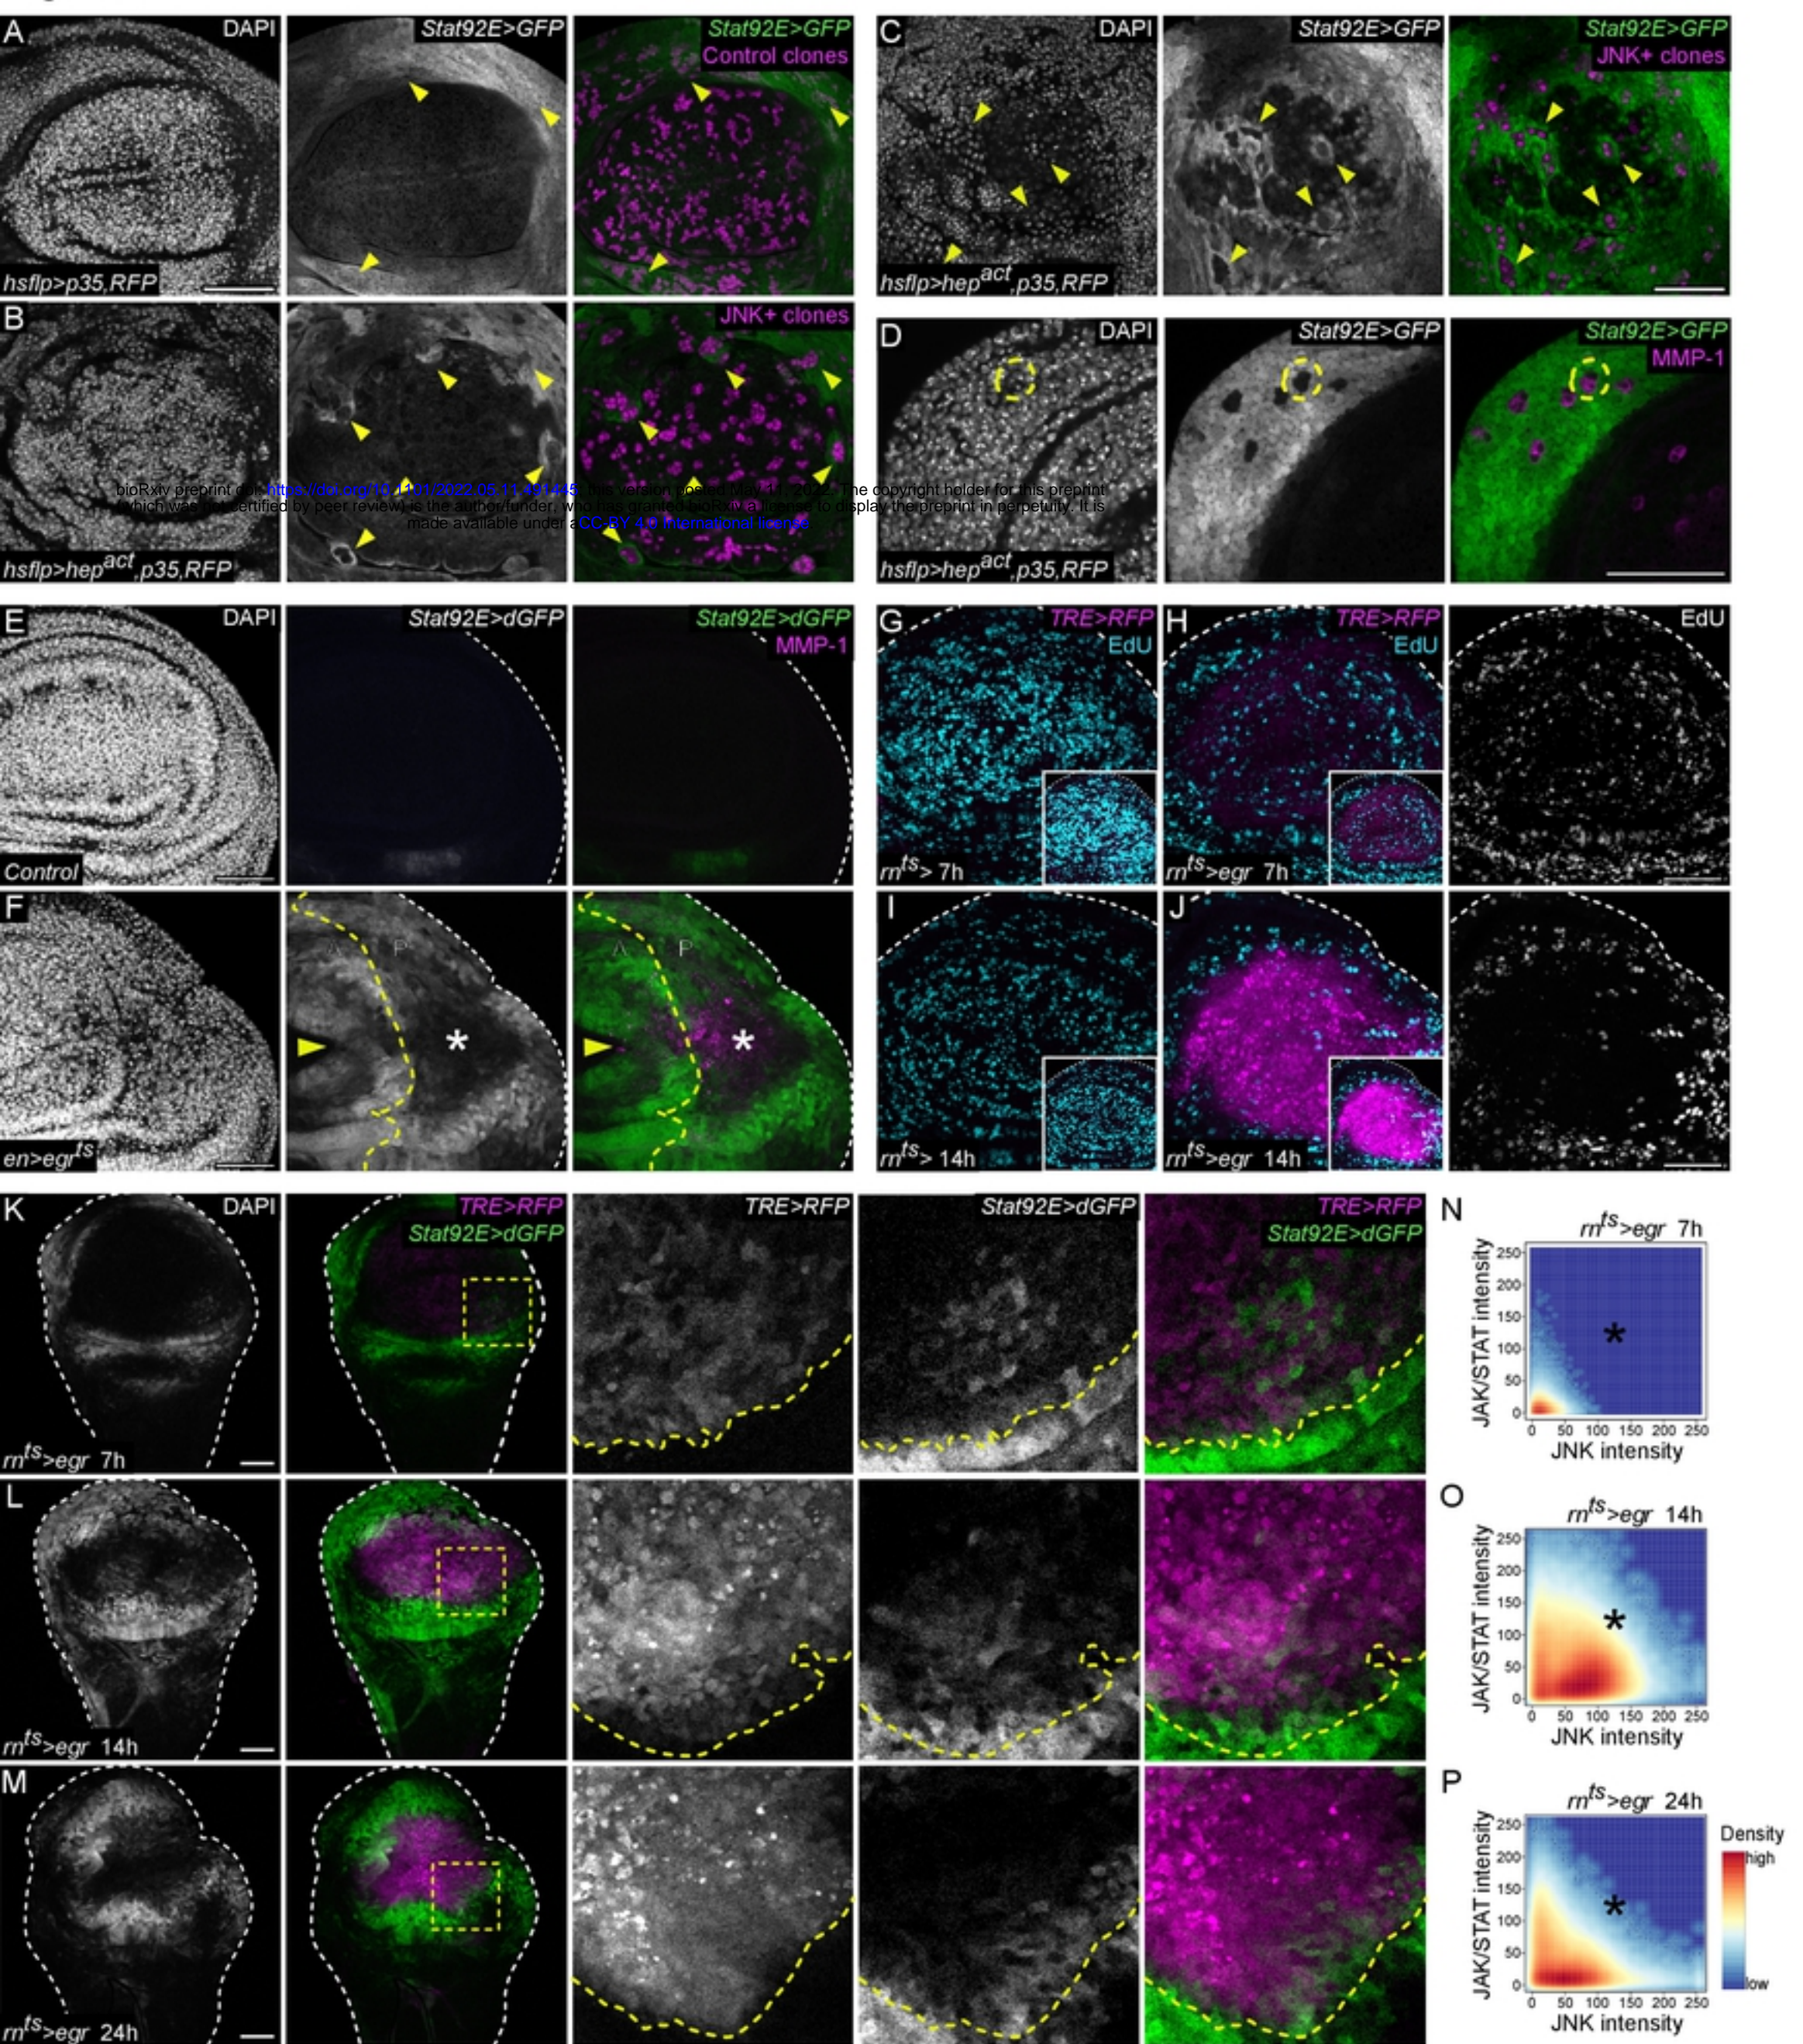

Figure 2



Figure 3

A

## Biologically observed reporter activity patterns

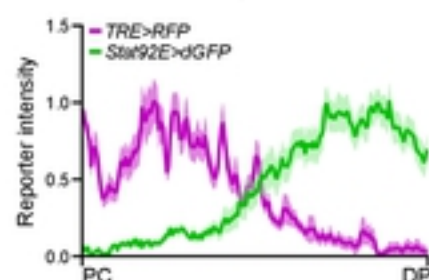

## Simple mathematical models

B

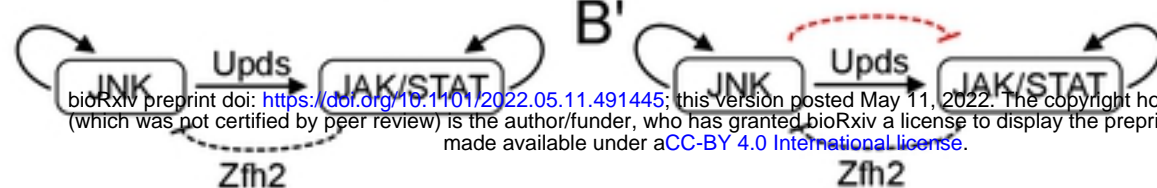

Uni-directional repression model

Mutual repression model

C

## Modeling equations

$$\begin{aligned}
 \frac{dEIG(t, x)}{dt} &= b_{EIG}(x) - k_{deg, EIG}EIG + k_{act, EIG} \frac{JNK^{n_1}}{K_{m, act, EIG}^{n_1} + JNK^{n_1}} + D_{EIG} \nabla^2 EIG \\
 \frac{dJNK(t, x)}{dt} &= b_{JNK} - k_{deg, JNK}JNK + k_{act, JNK} \frac{EIG^{n_2}}{(K_{m, act, JNK}^{n_2} + EIG^{n_2})(1 + k_{inh, JNK, by, JAK}^{n_{i1}} JAK^{n_{i1}})} \\
 \frac{dJAK(t, x)}{dt} &= b_{JAK} - k_{deg, JAK}JAK + k_{act, JAK} \frac{UPD^{n_3}}{(K_{m, act, JAK}^{n_3} + JAK^{n_3})(1 + k_{inh, JAK, by, JNK}^{n_{i2}} JNK^{n_{i2}})} \\
 \frac{dUPD(t, x)}{dt} &= b_{UPD} - k_{deg, UPD}UPD + k_{act, UPD} \frac{JNK^{n_4}}{K_{m, act, UPD}^{n_4} + JNK^{n_4}} + D_{UPD} \nabla^2 UPD
 \end{aligned}$$

## Global analysis by sampling approach

Automated extraction of simulation outcomes based on selected inclusion criteria

D

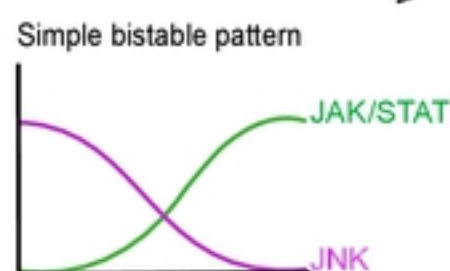

D'

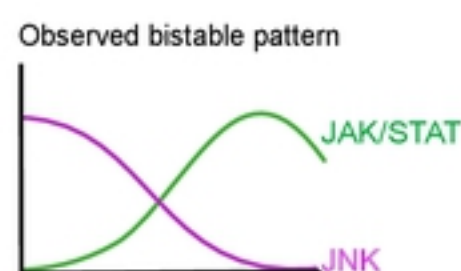

E

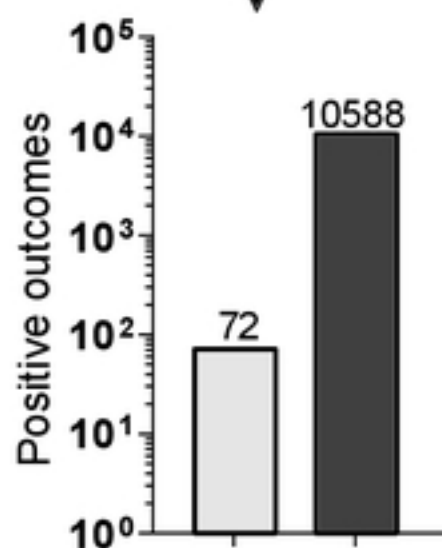

E'

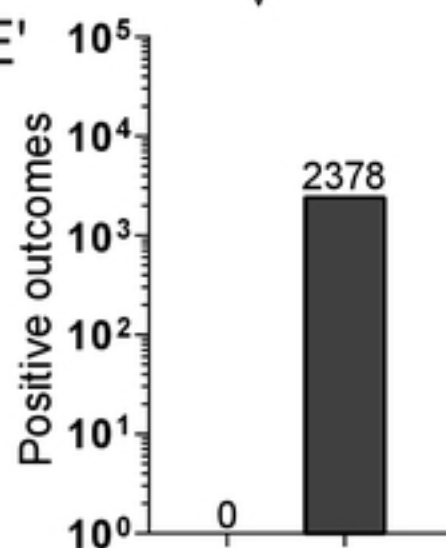

Uni-directional repression model

Mutual repression model

Figure 3



Figure 4

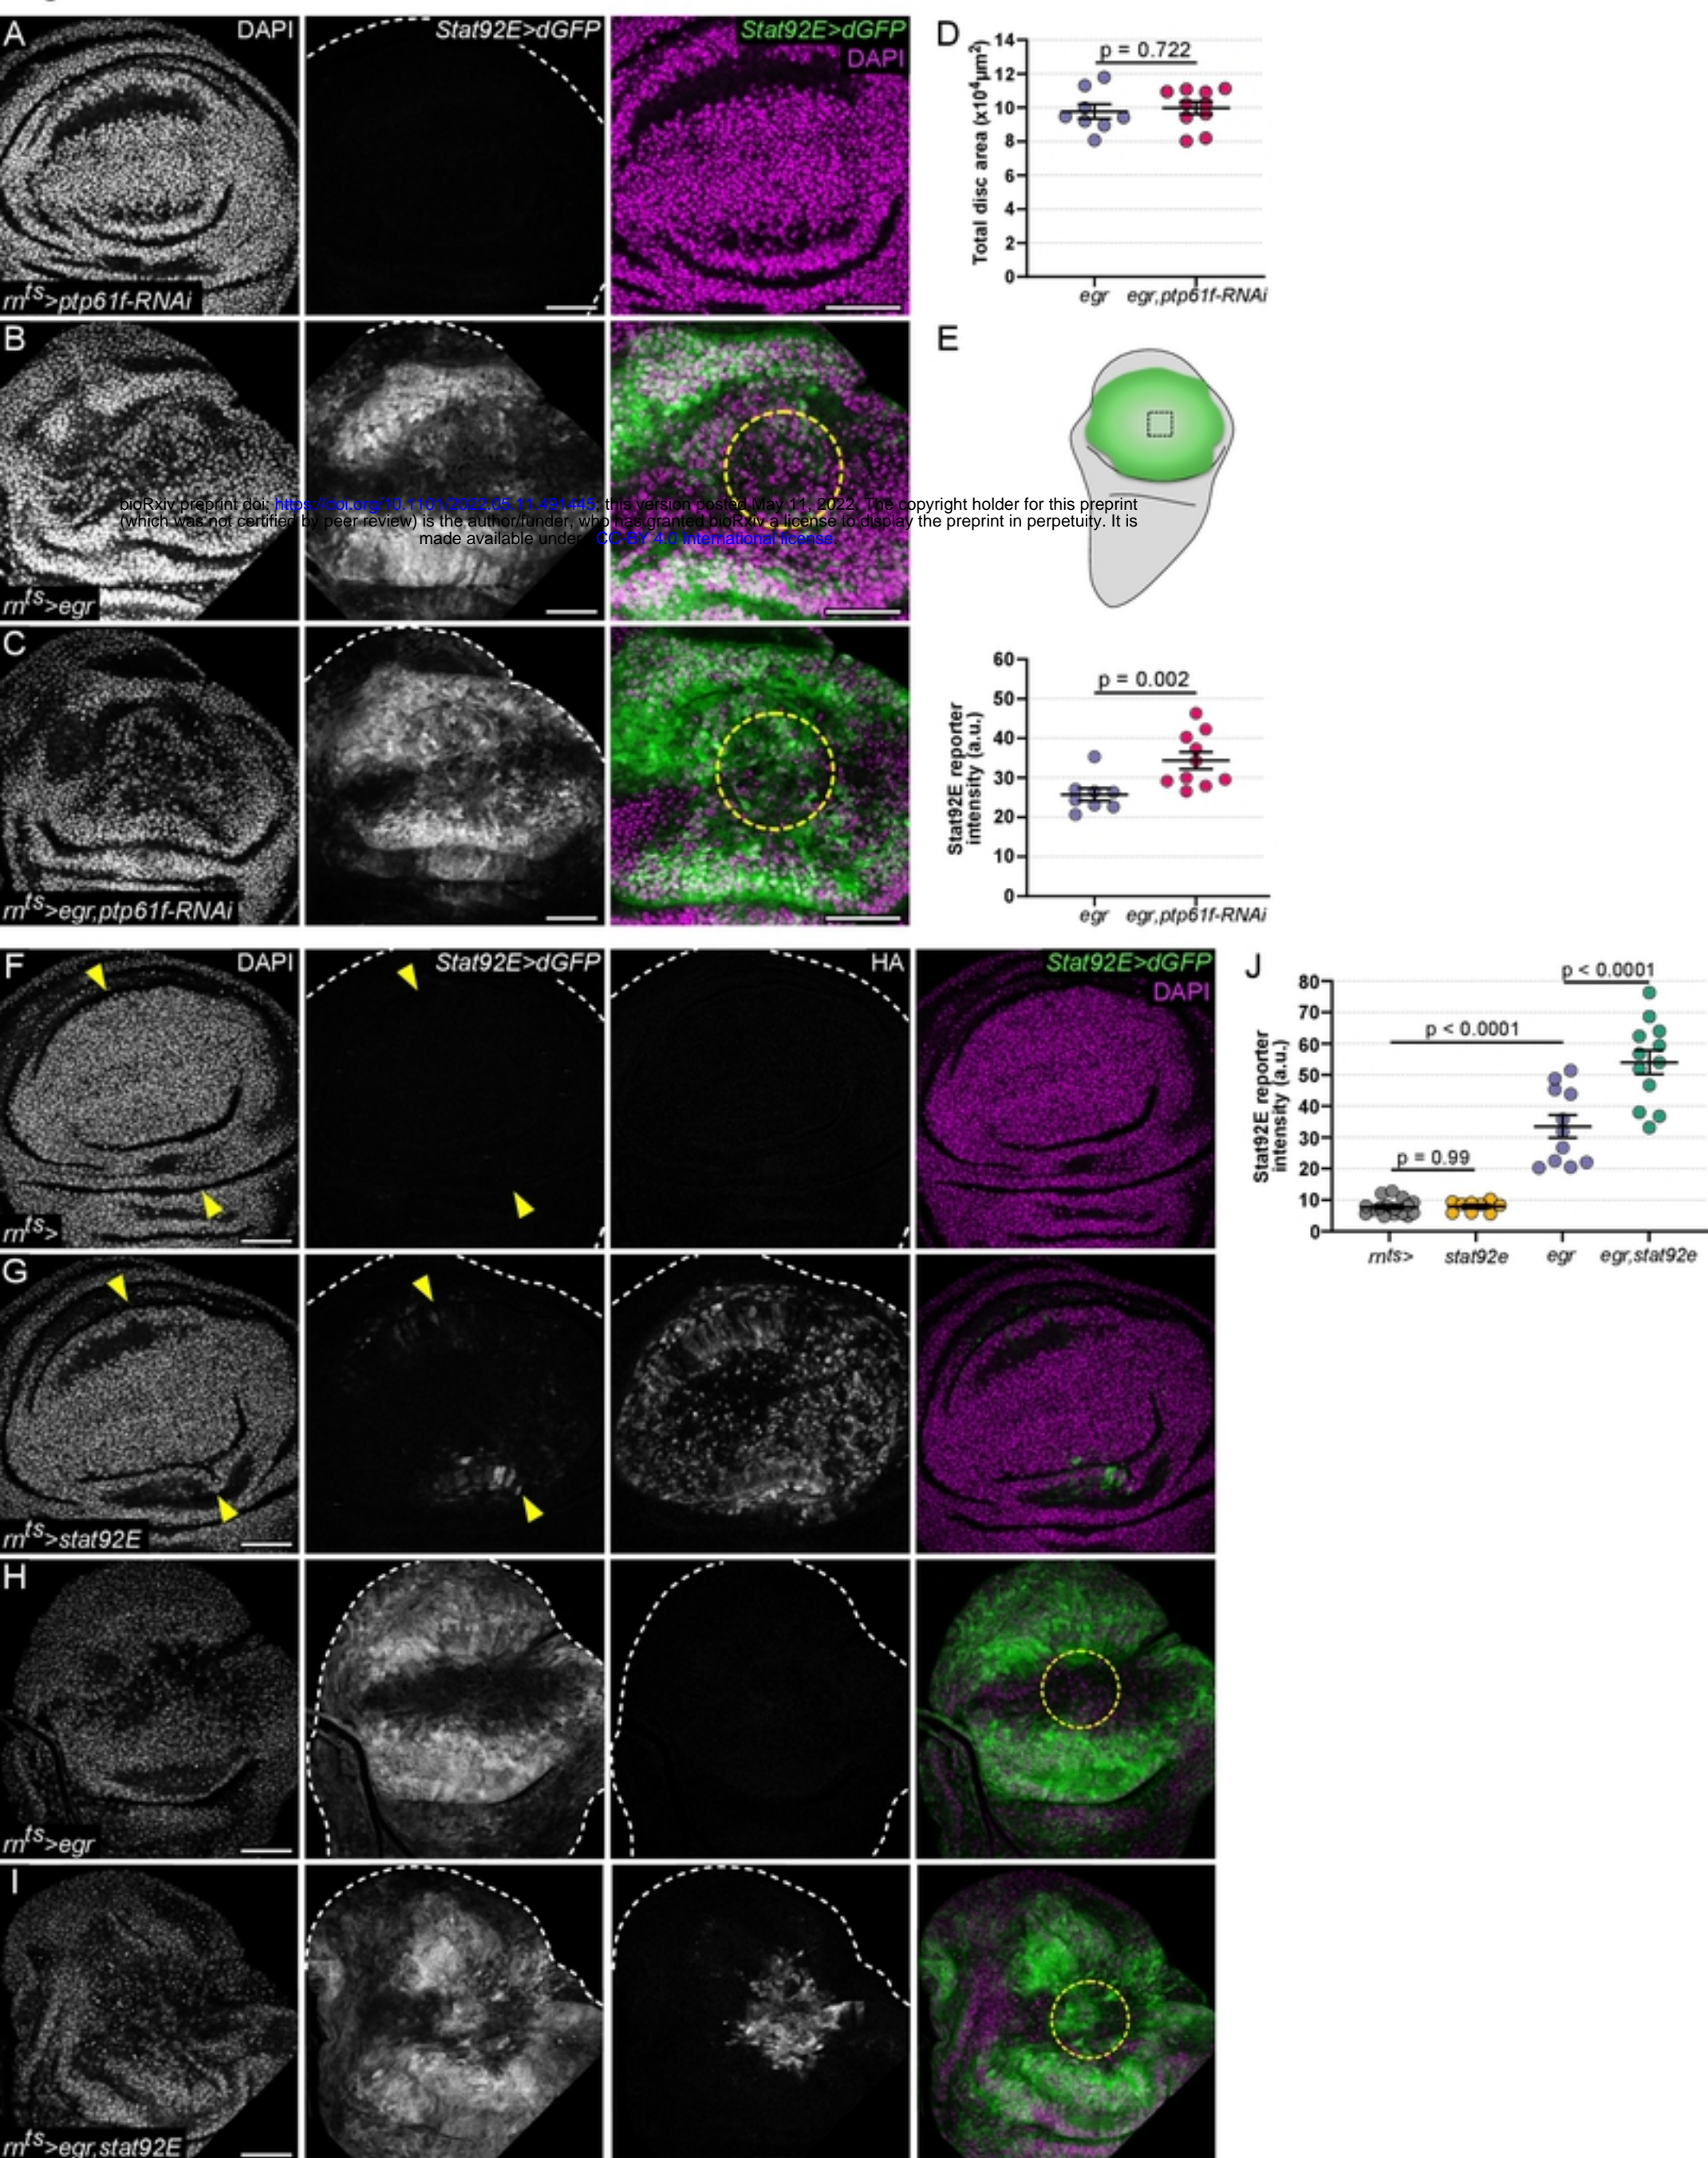

Figure 4



Figure 5

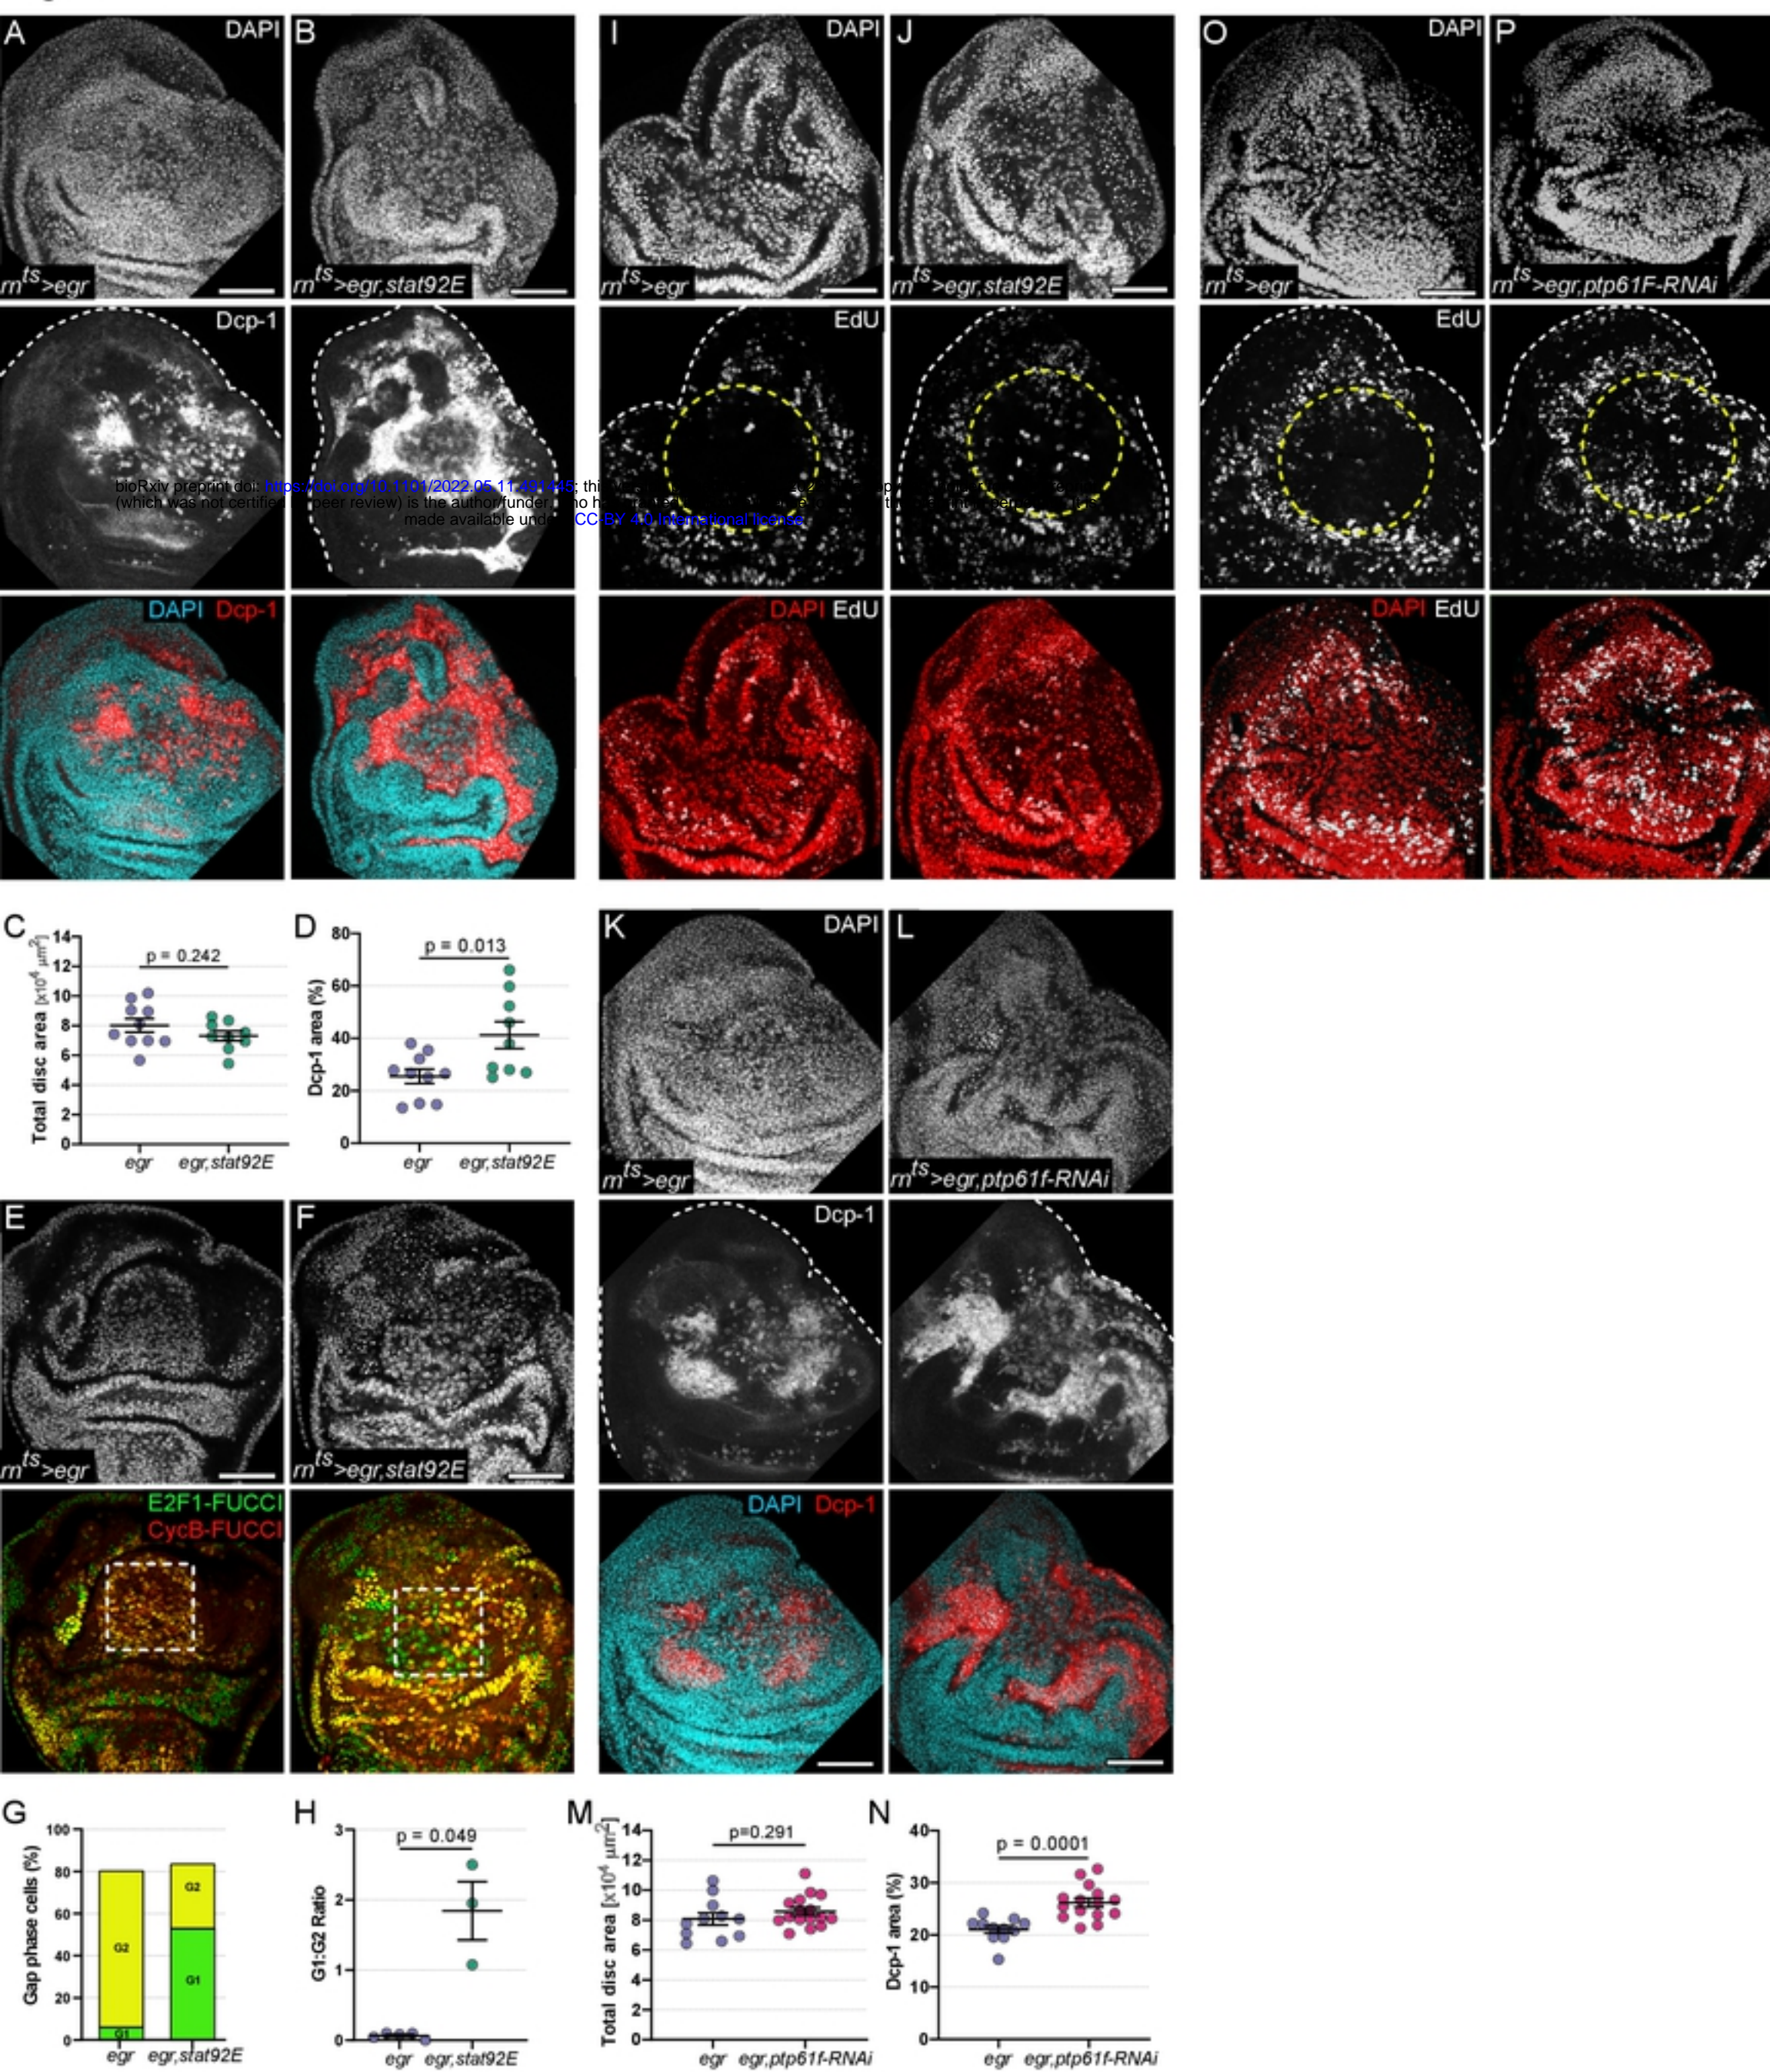

Figure 5



Figure 6

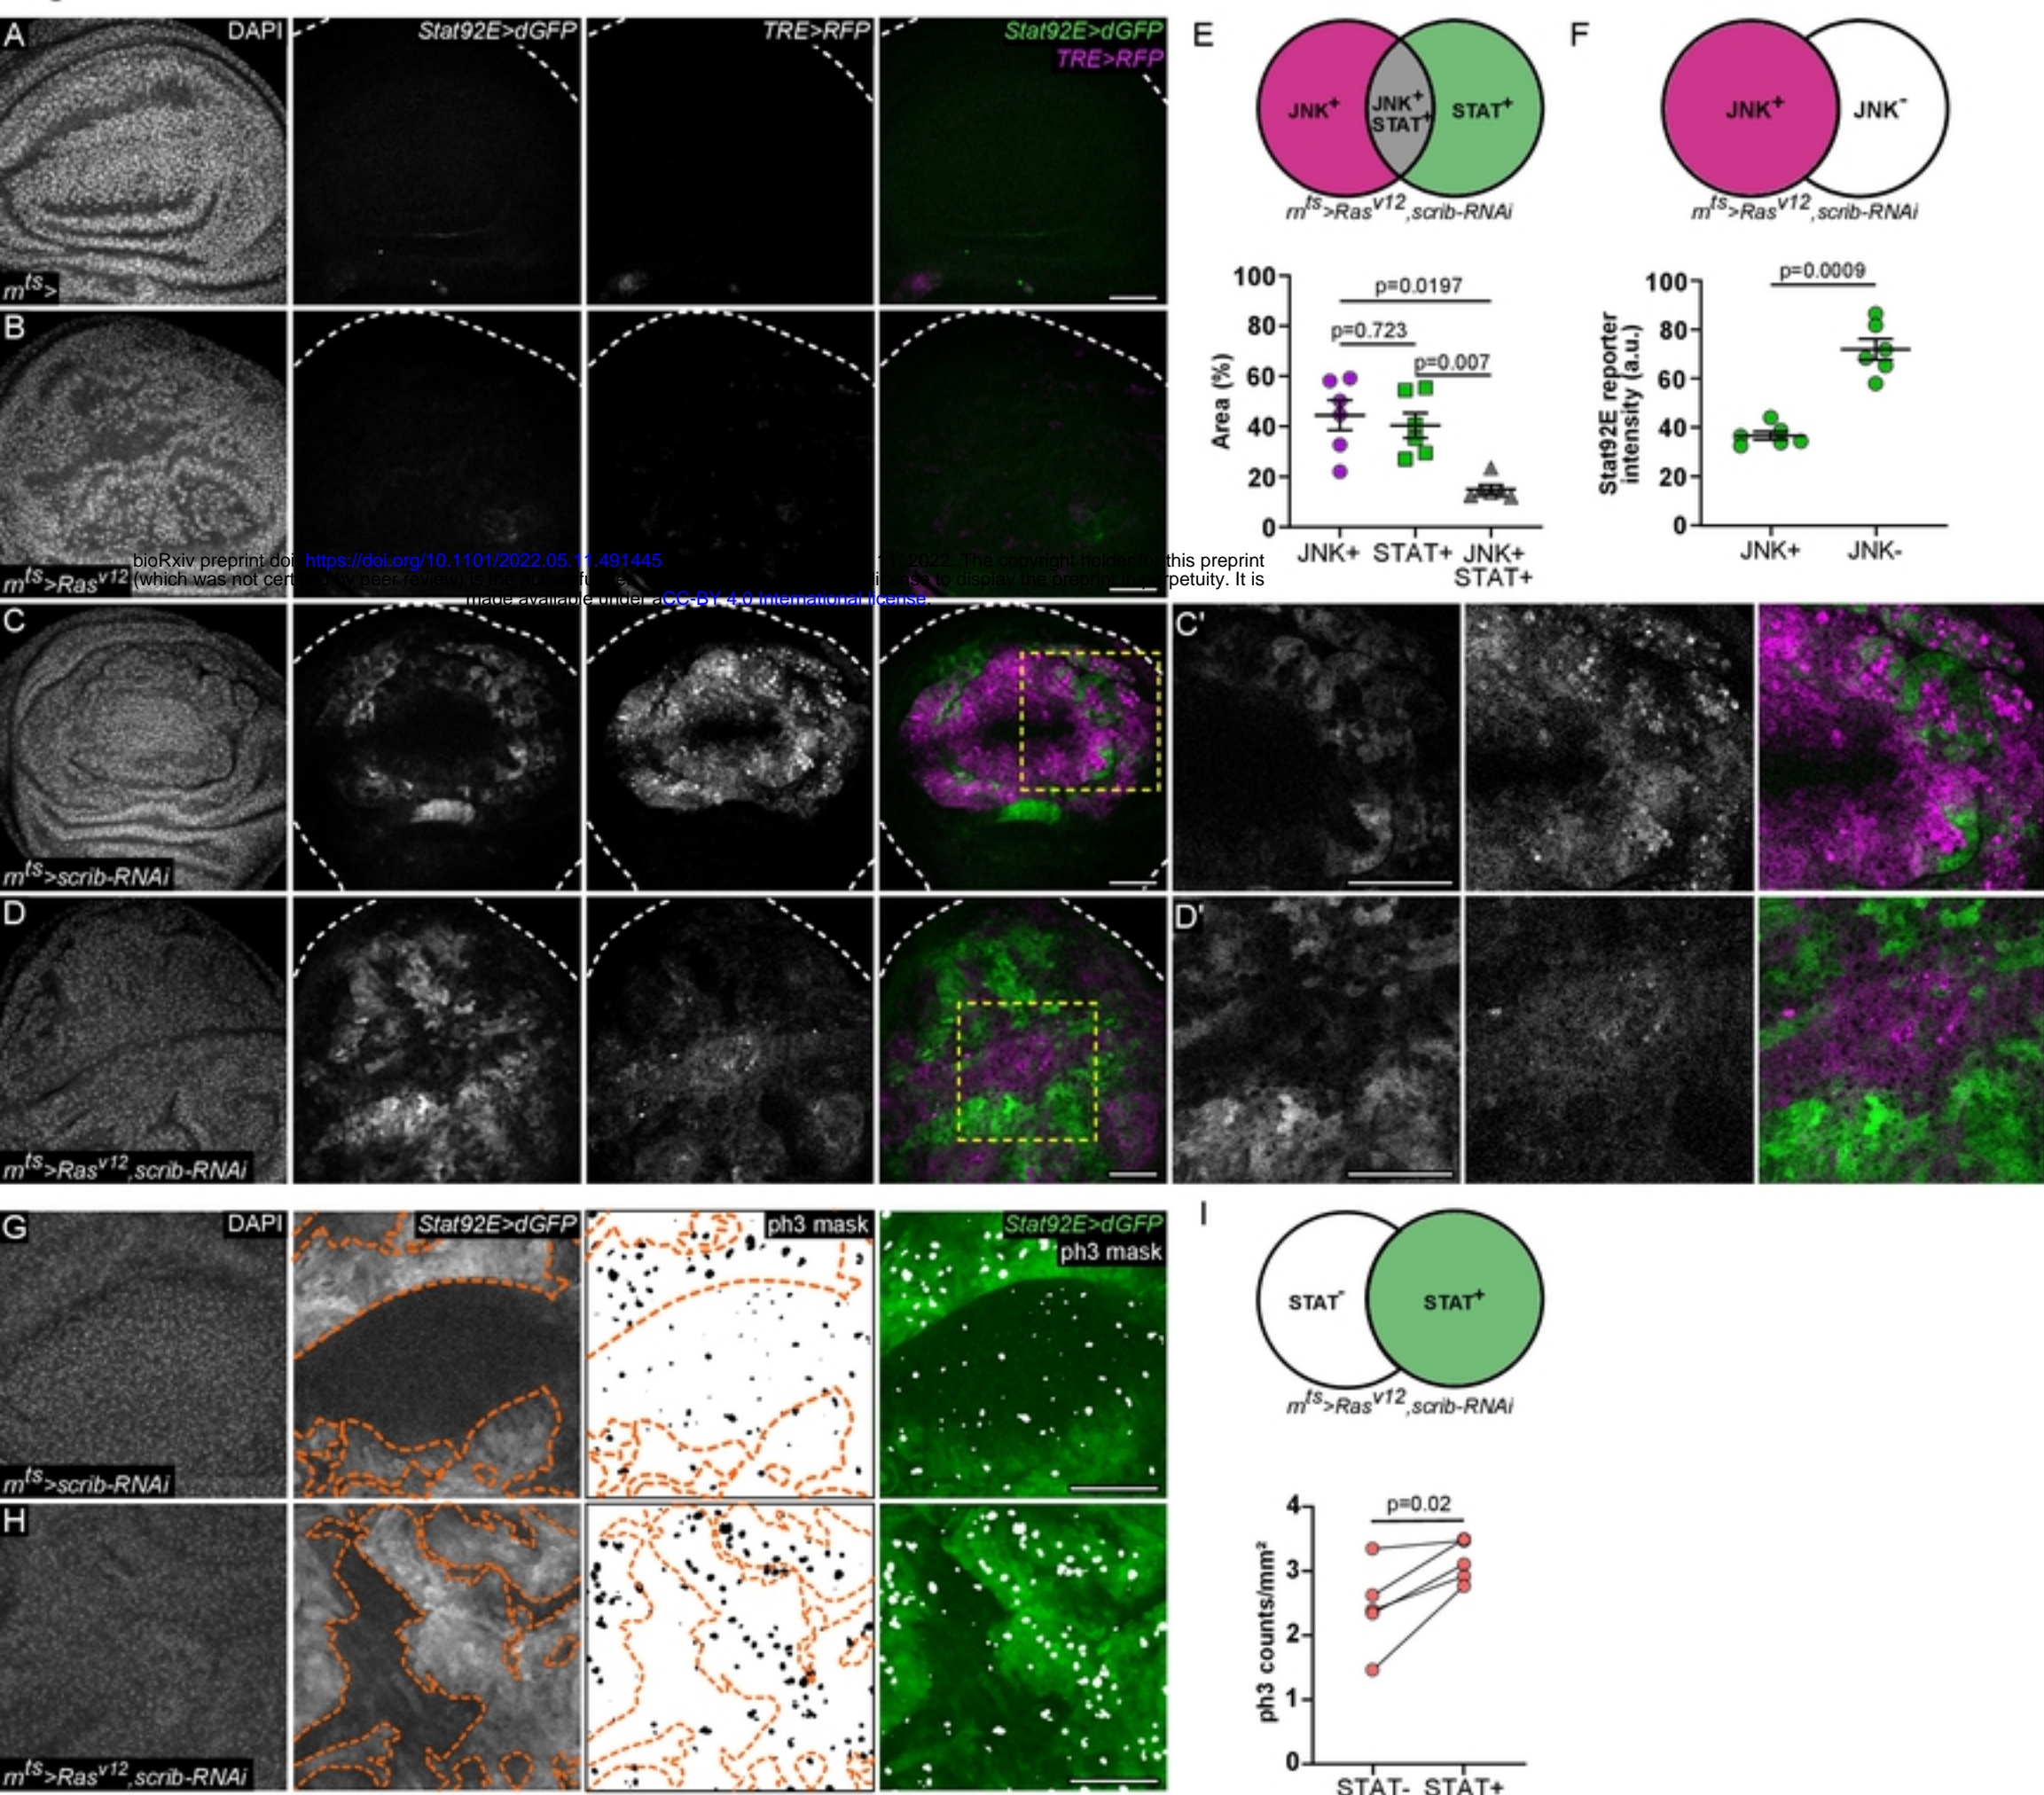

Figure 6



Figure 7

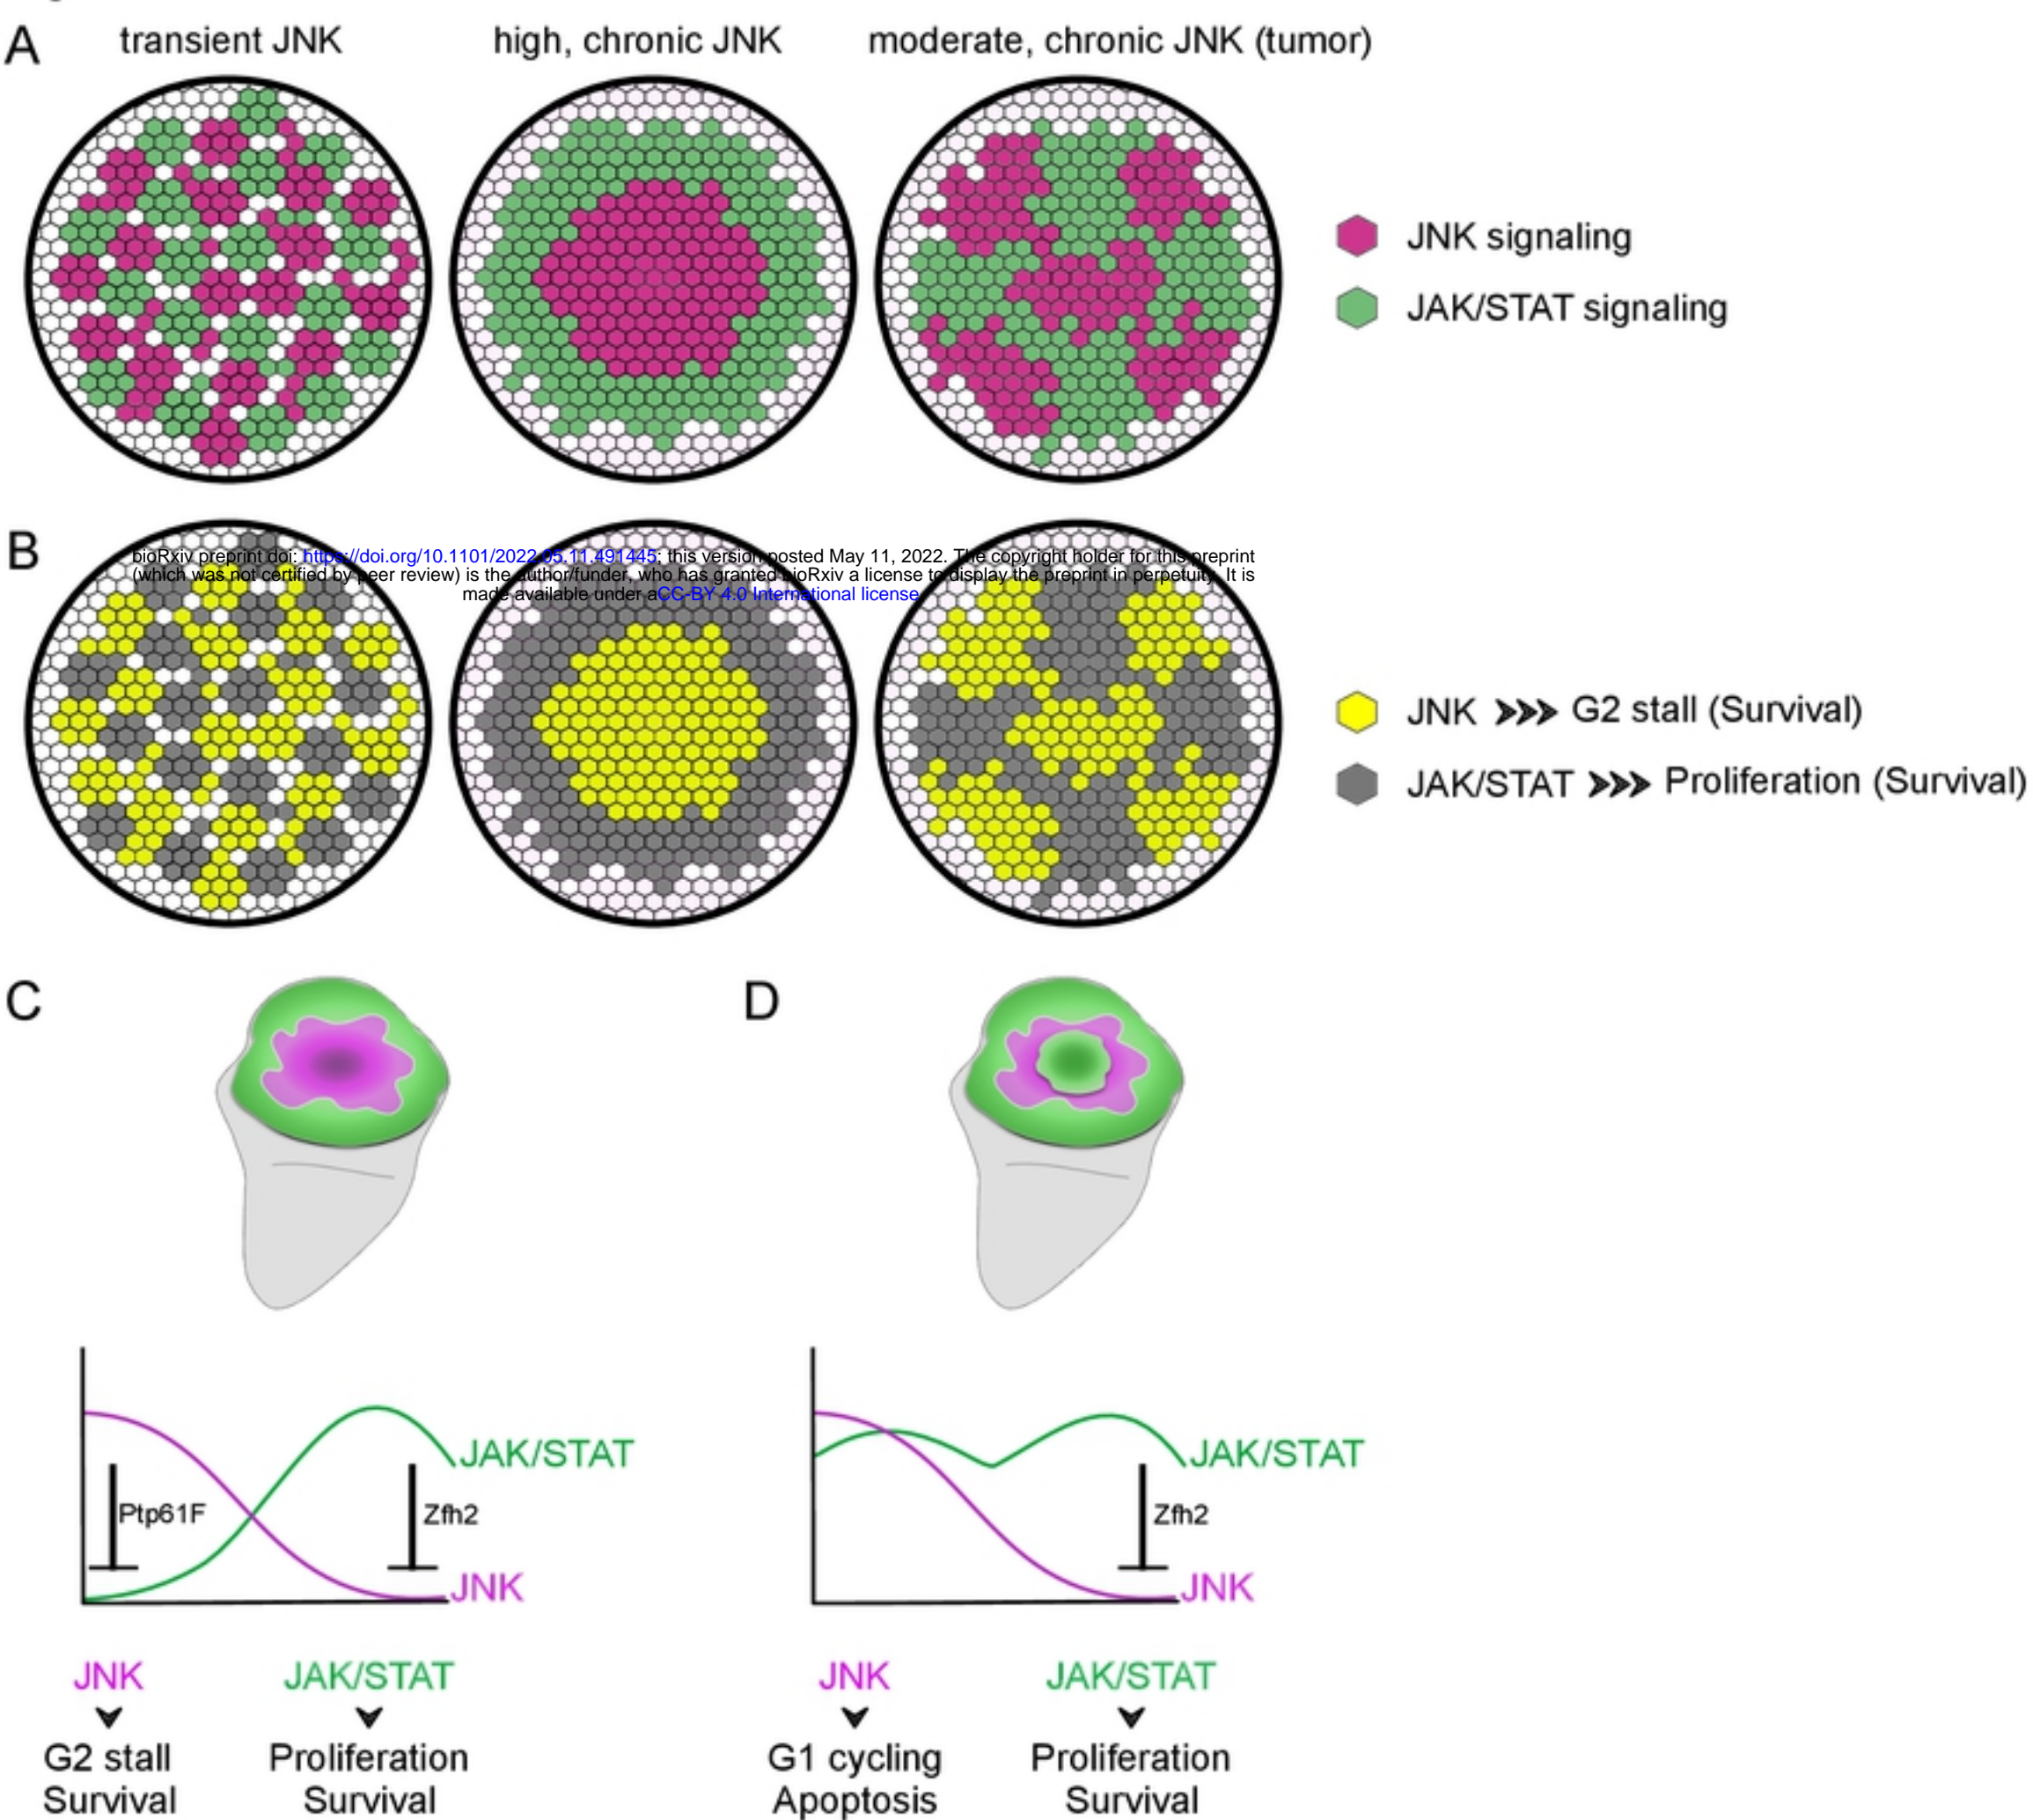

Figure 7
